# Supplementary material
Source: Research Square preprint supplement (doi:10.21203/rs.3.rs-9533108/v1)

Figure S1B

B

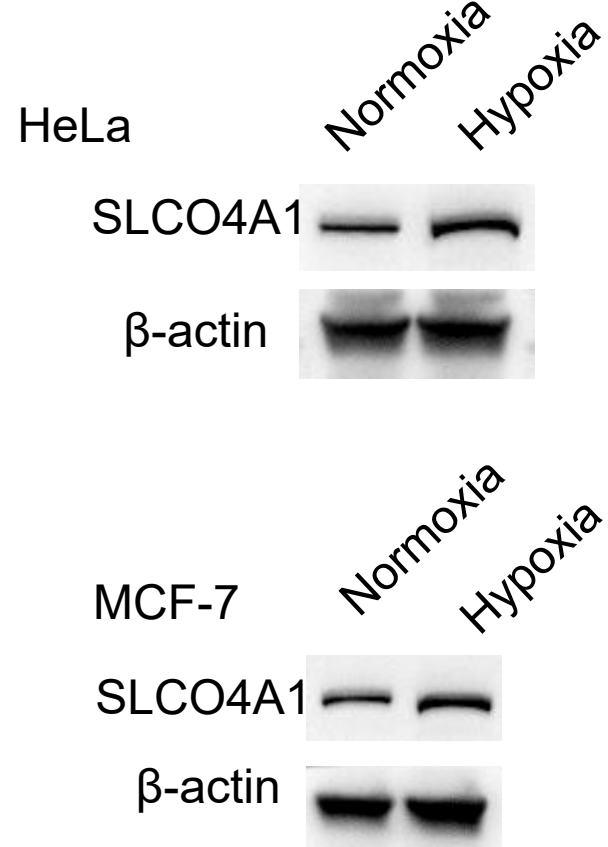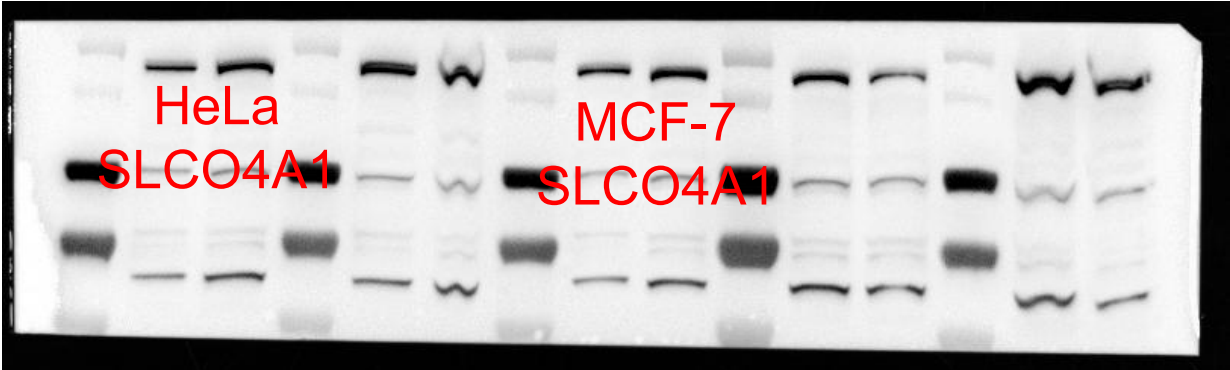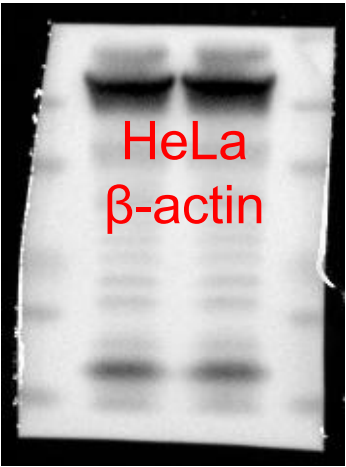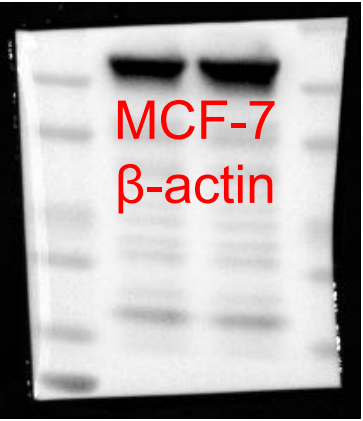

Figure S1C

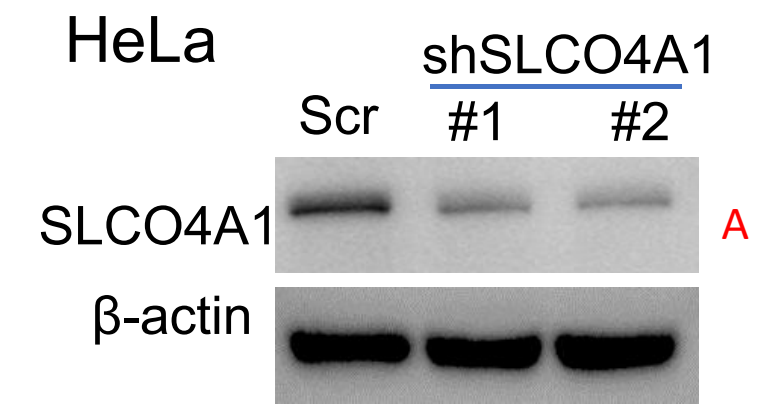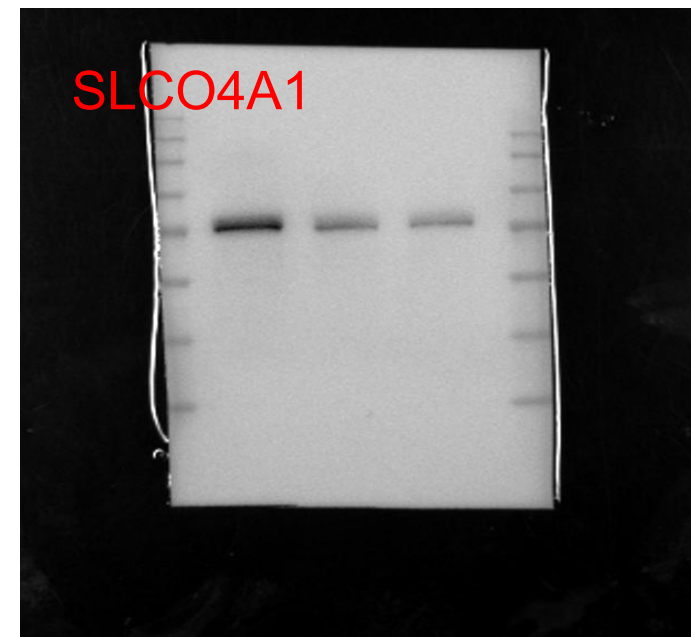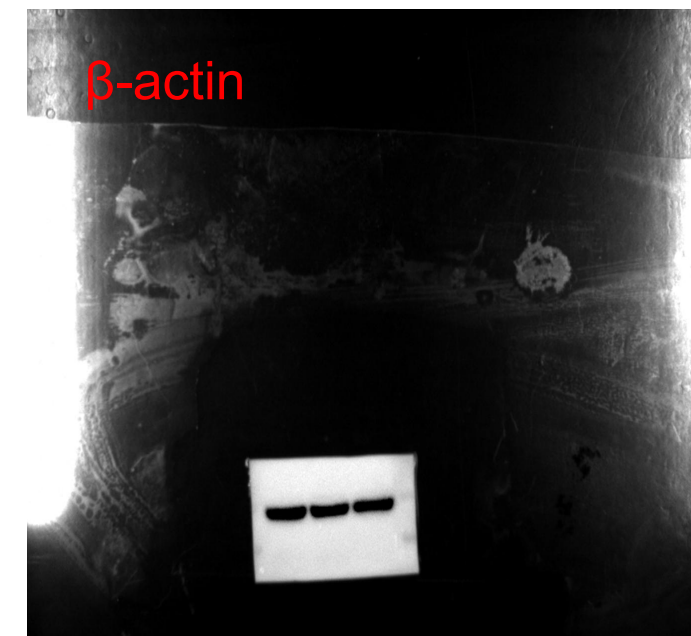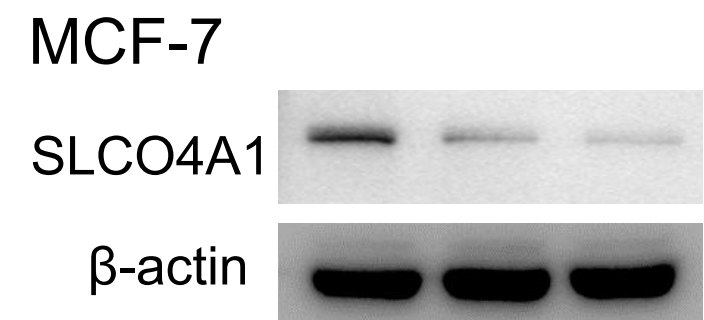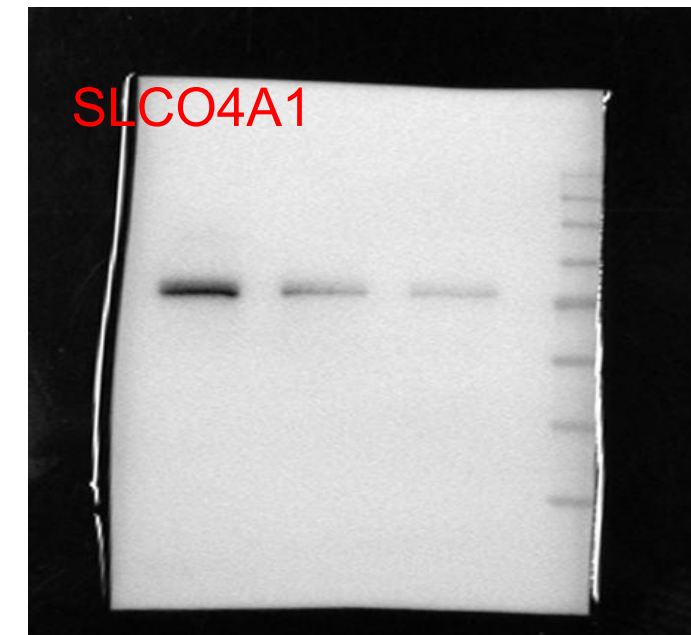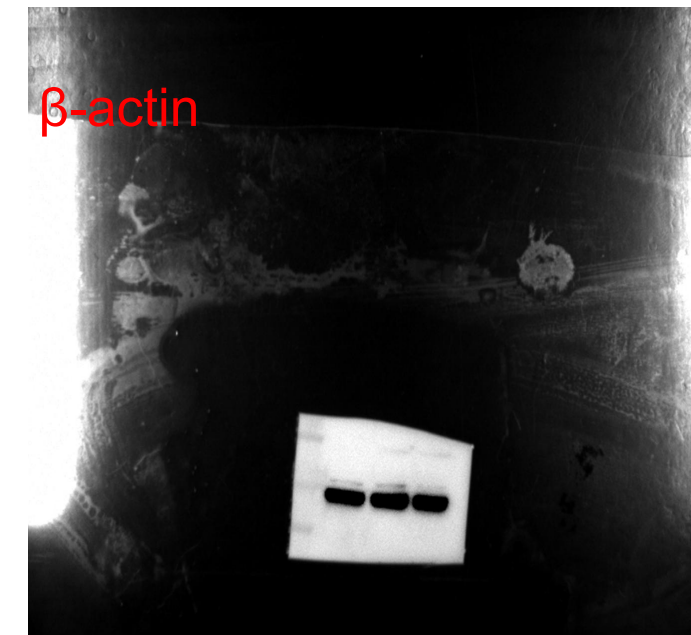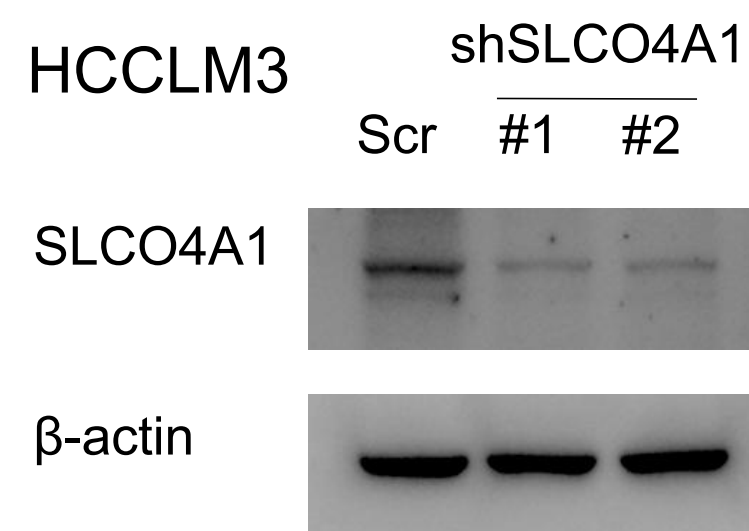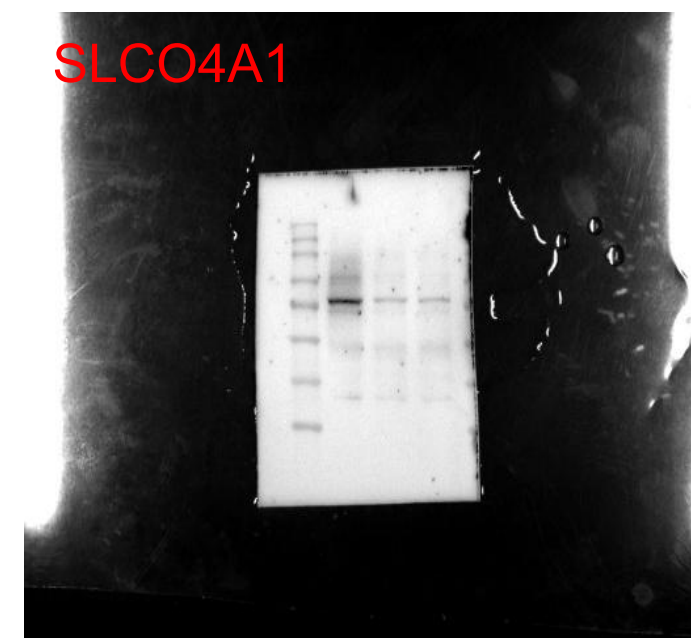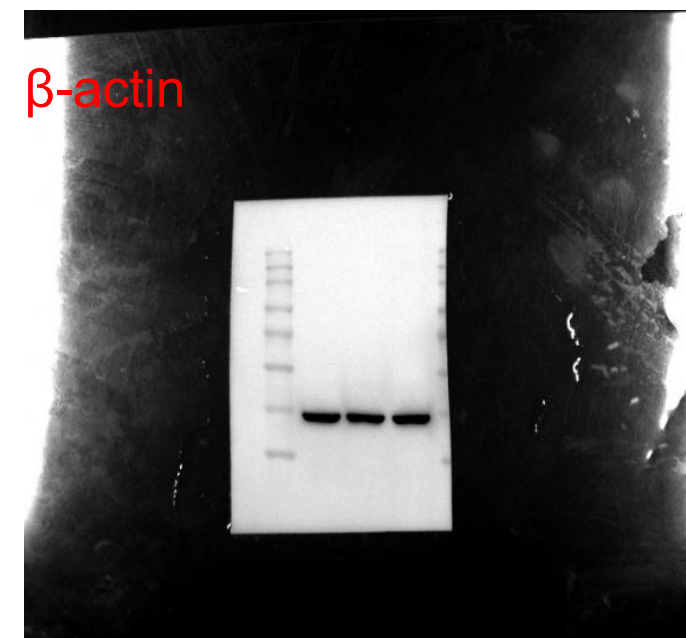

Figure S1F

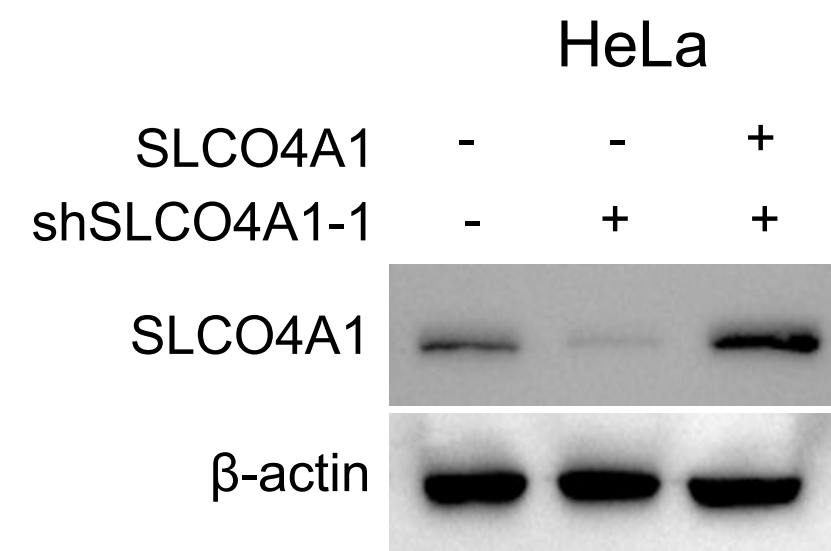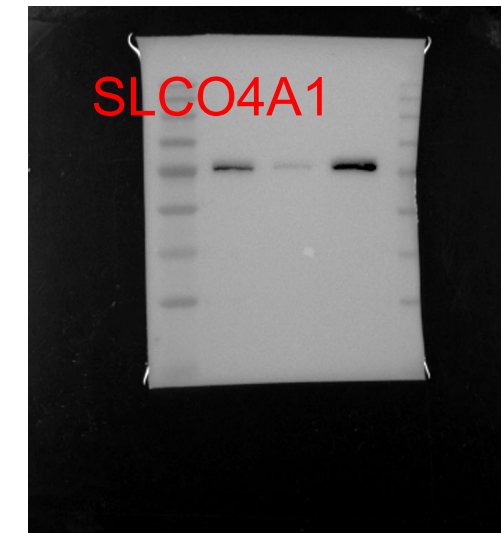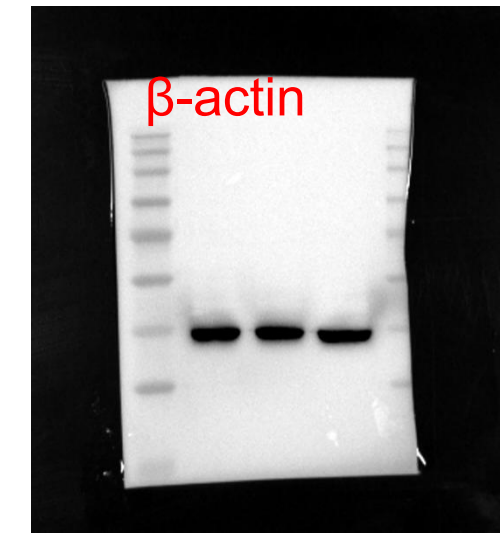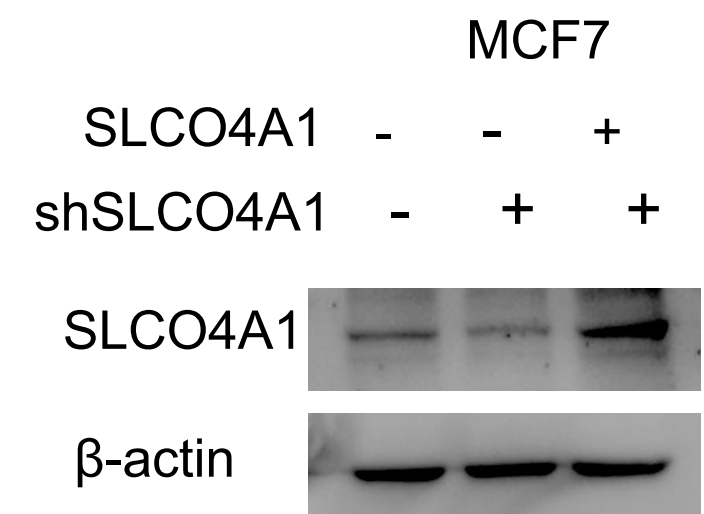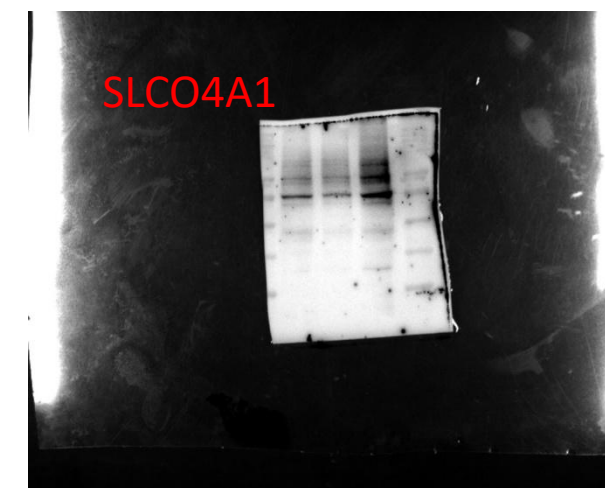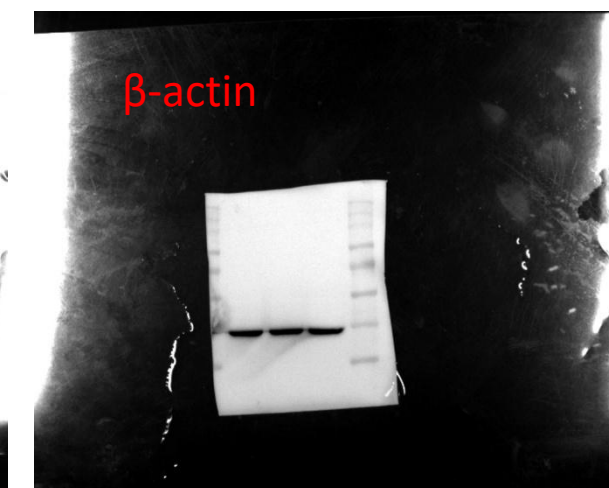

Figure 2D

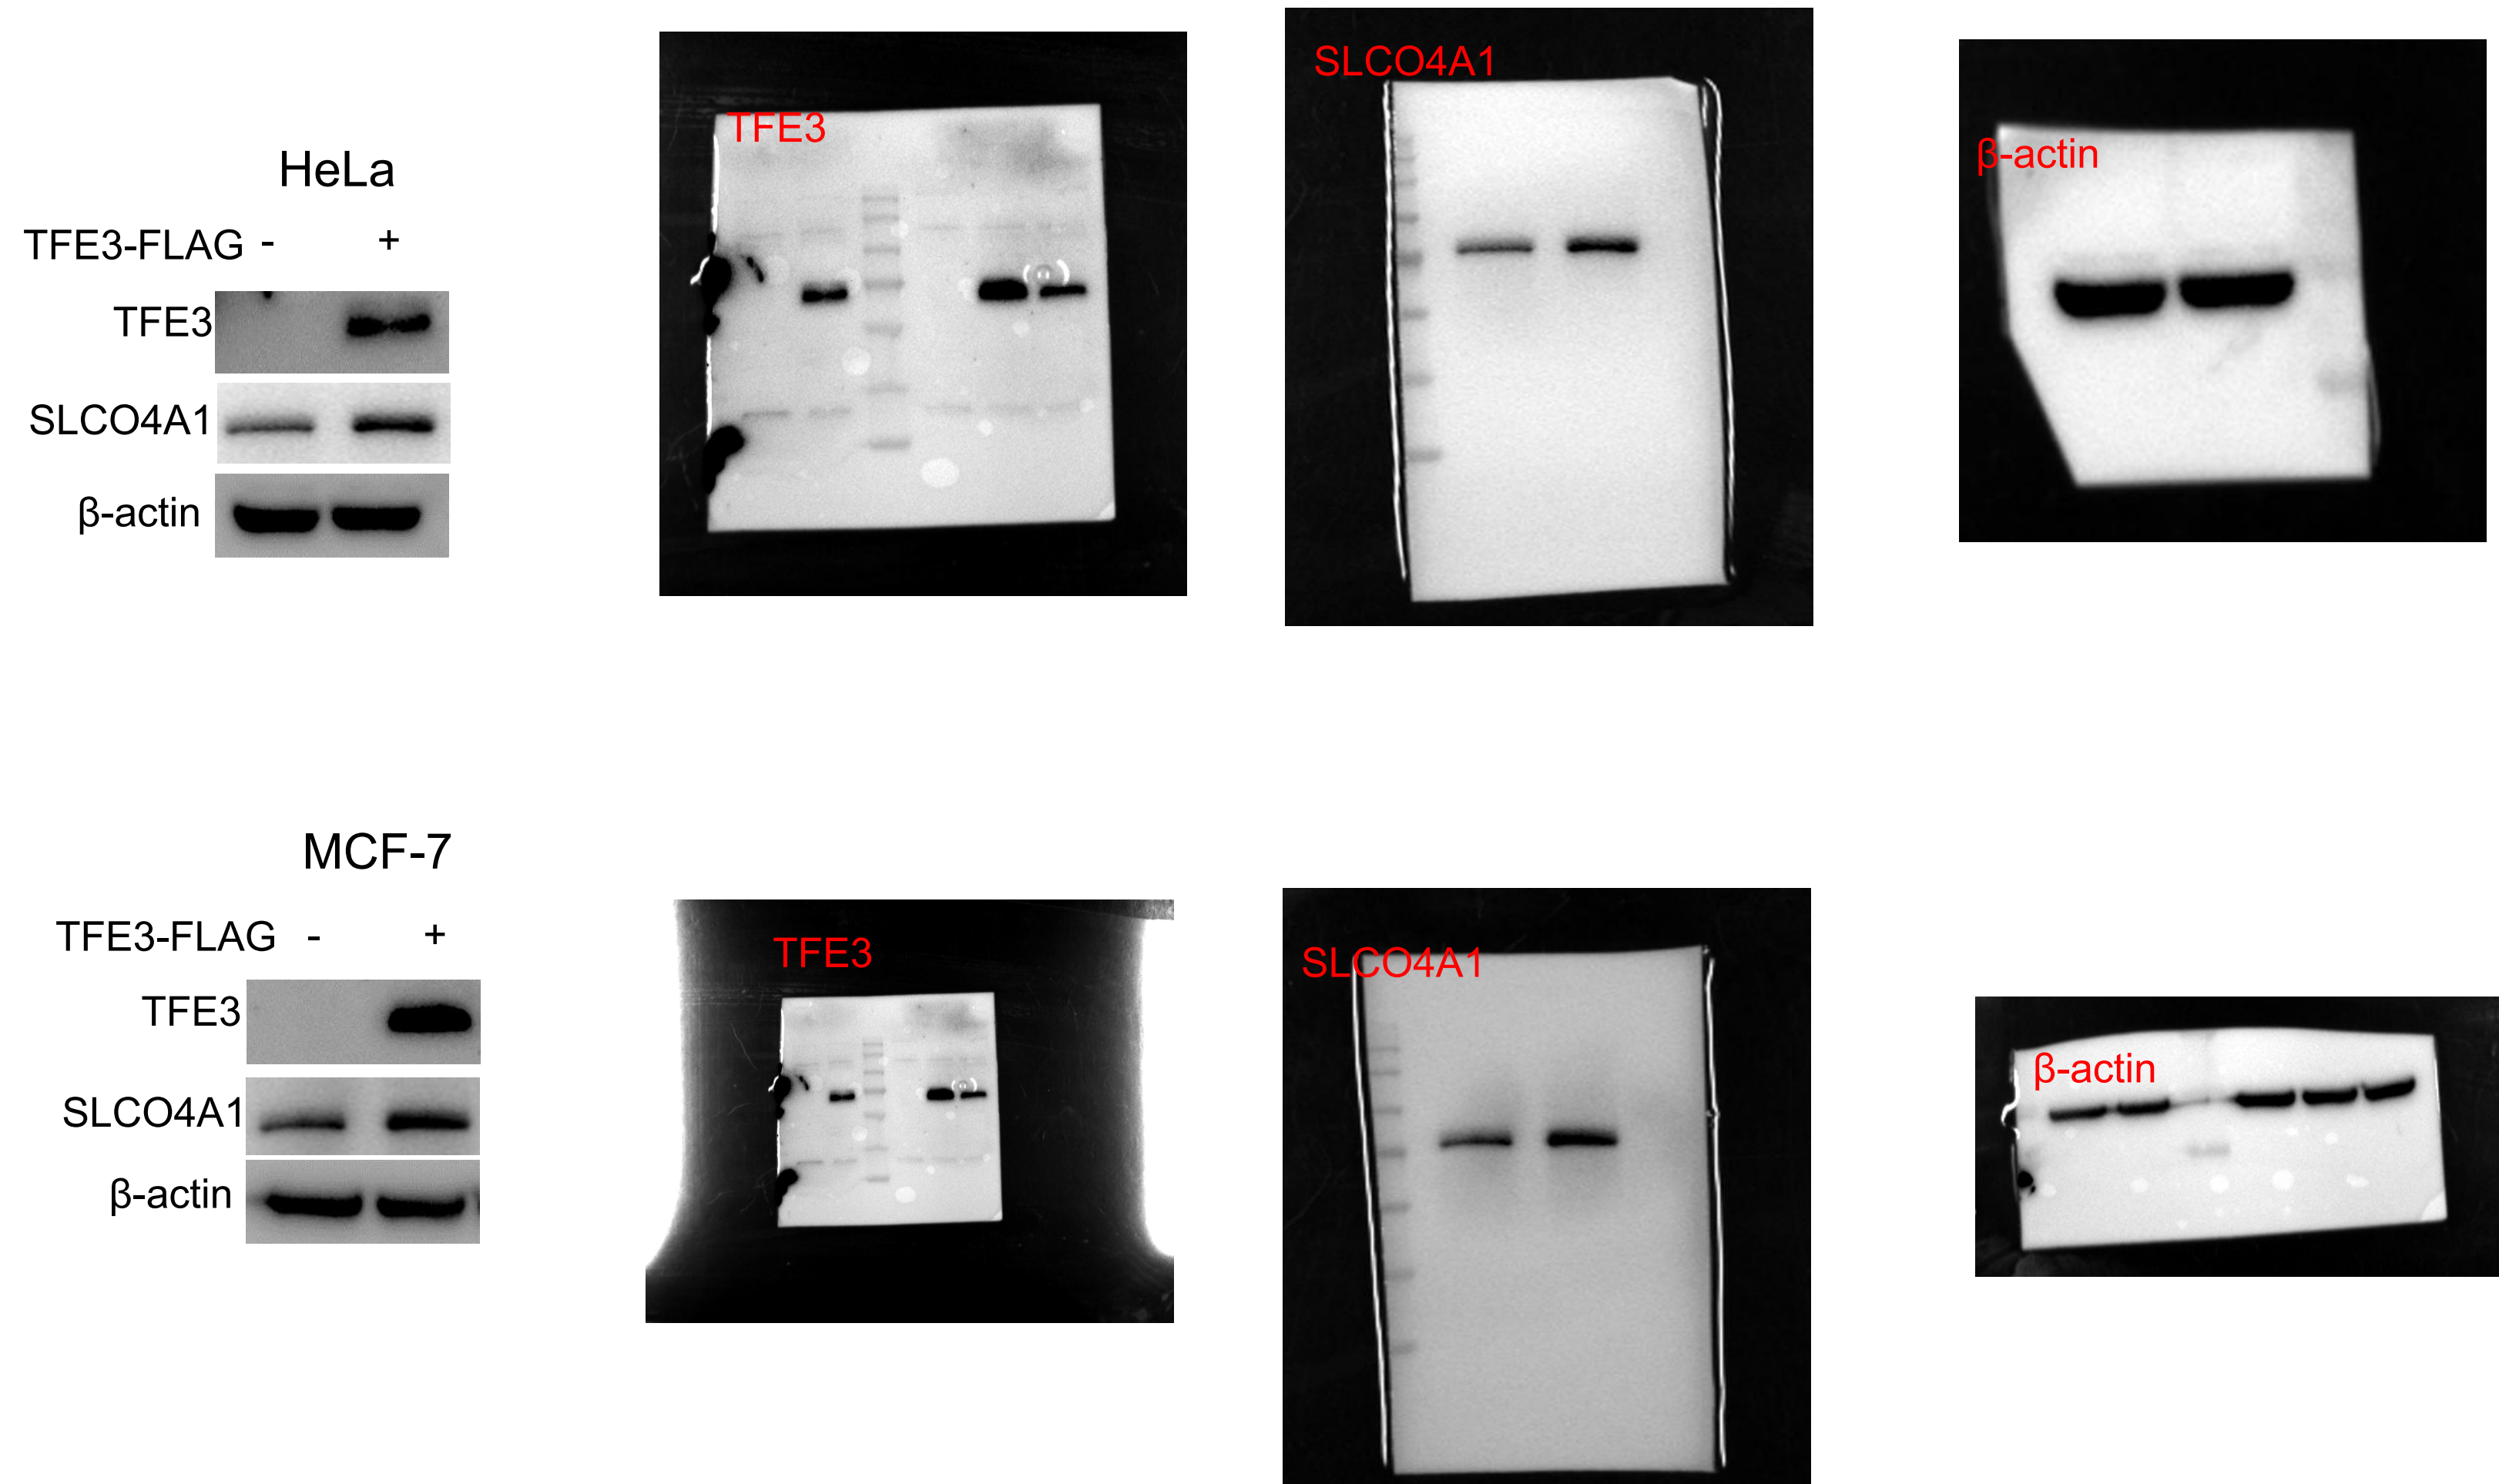

Figure S3A

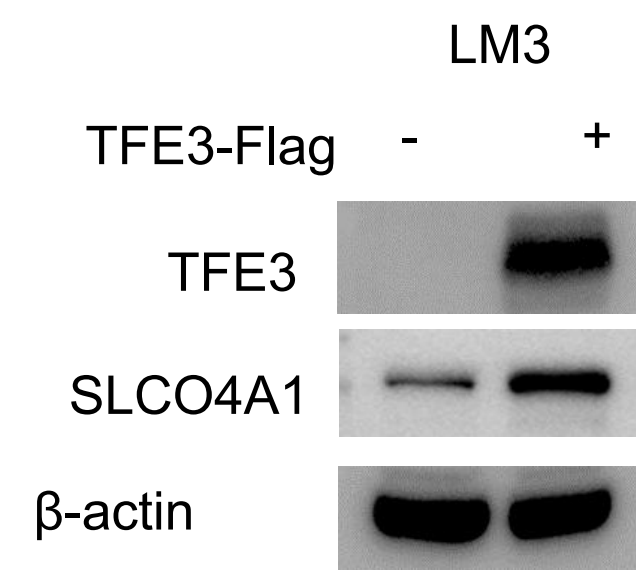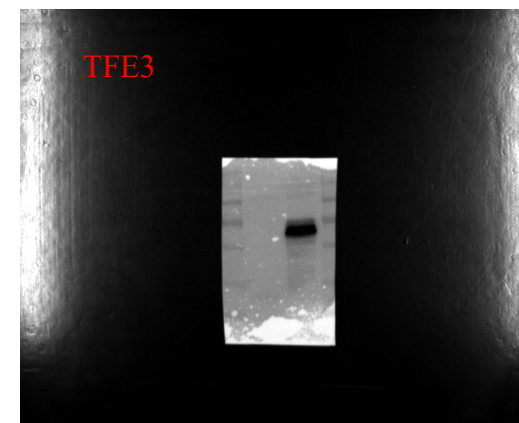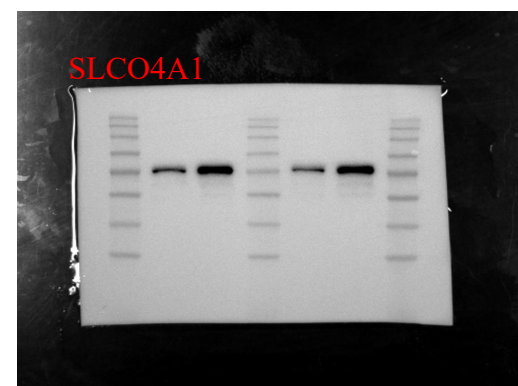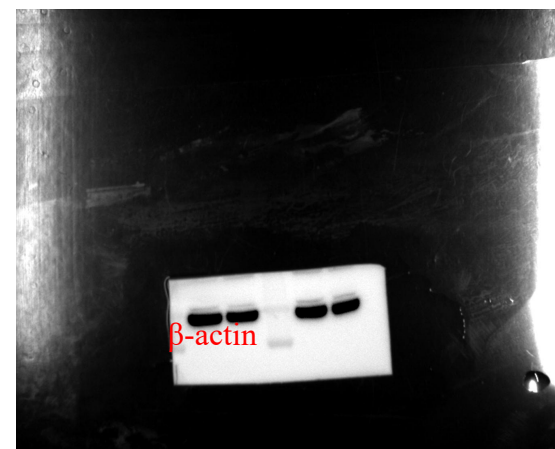

Figure S3F

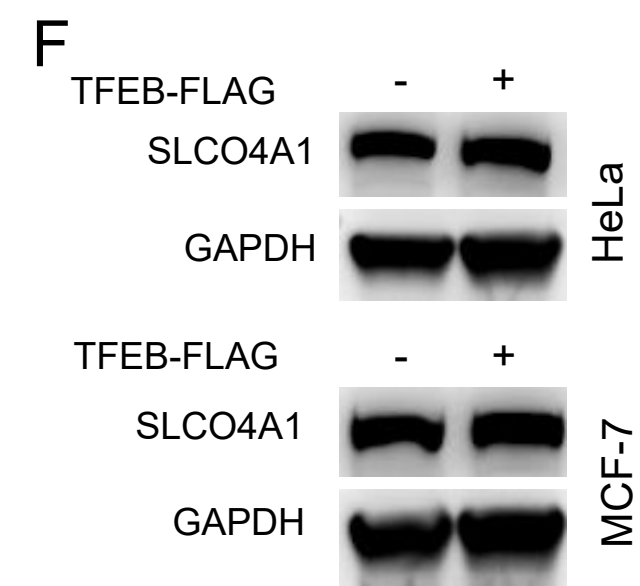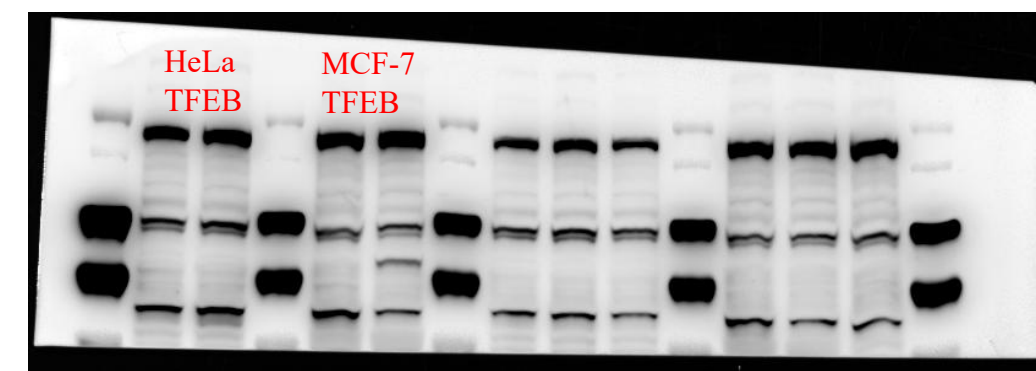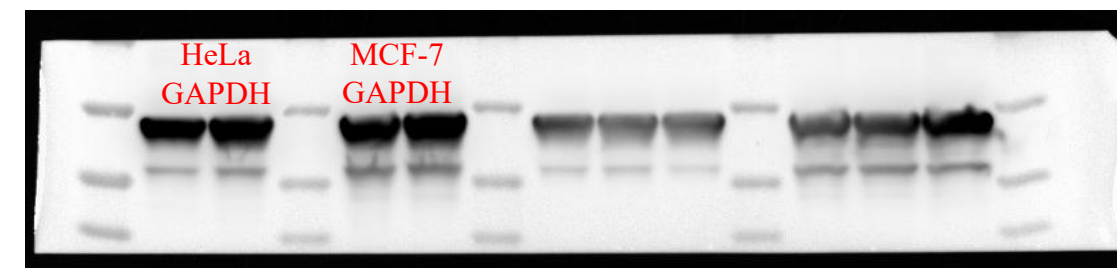

Figure 3A

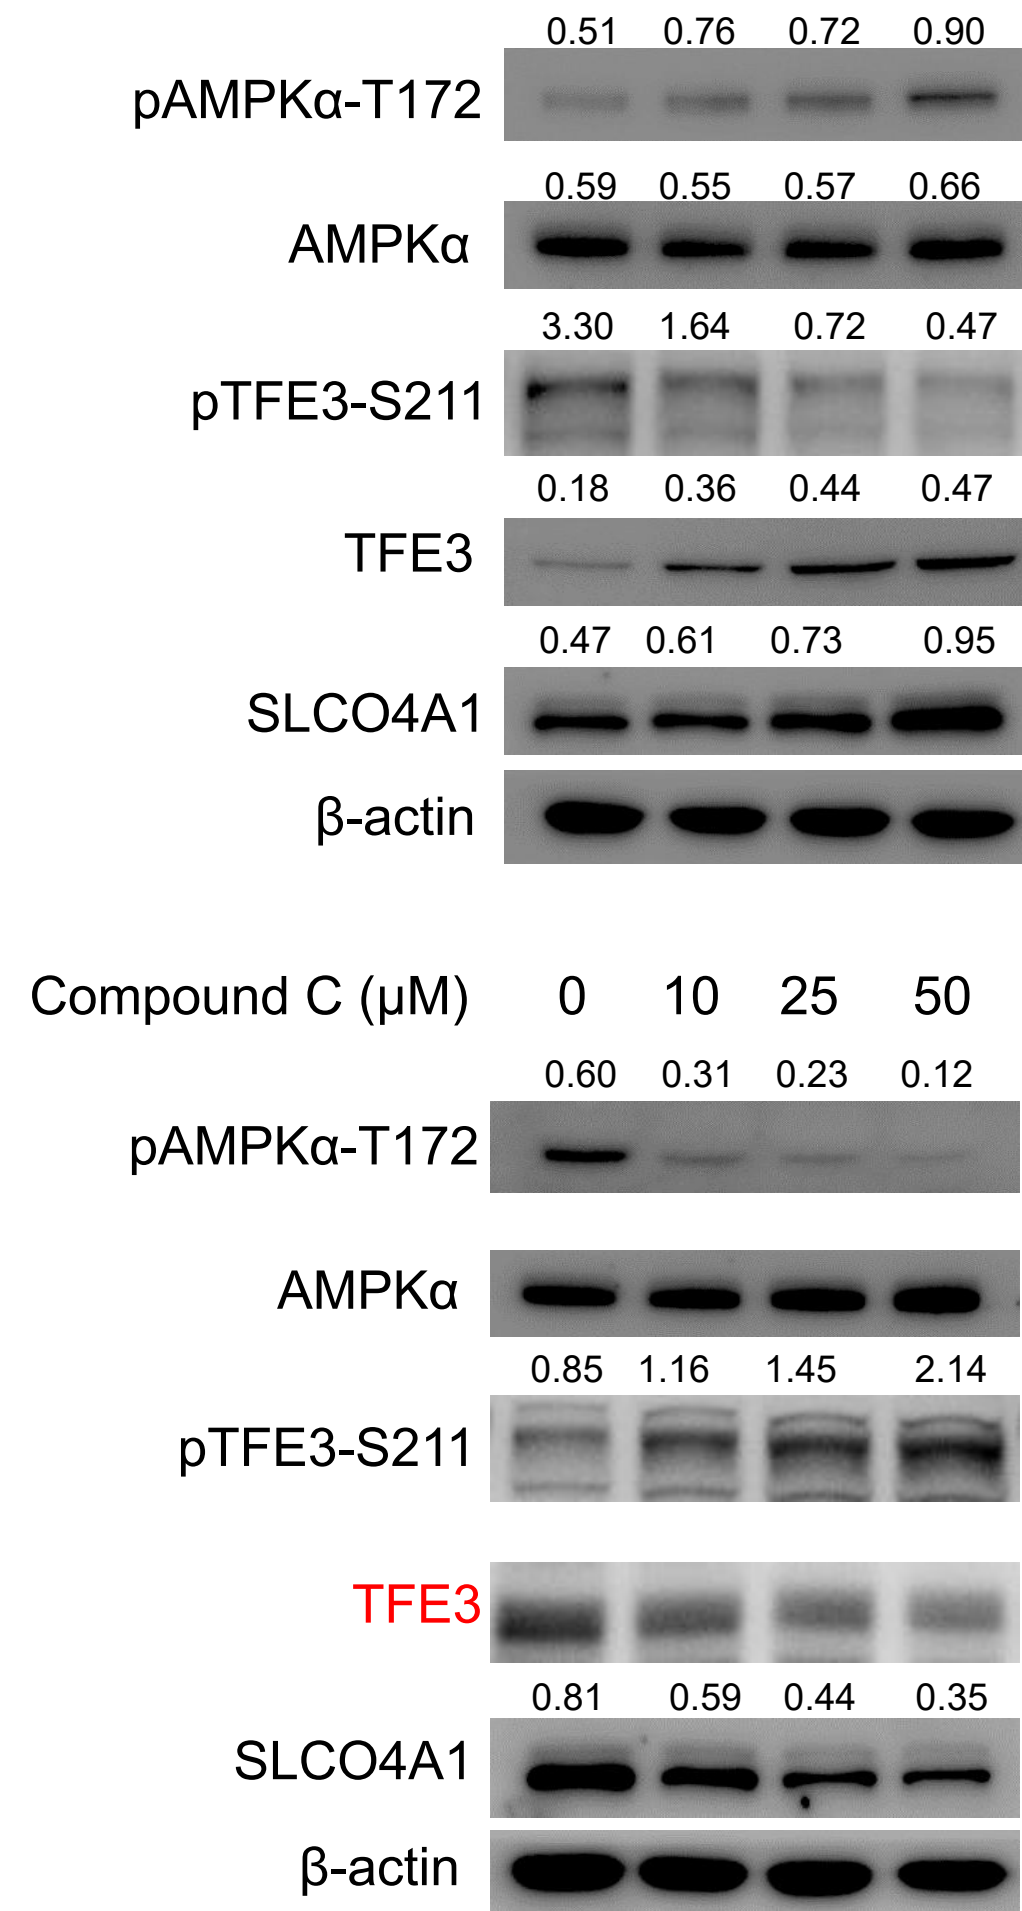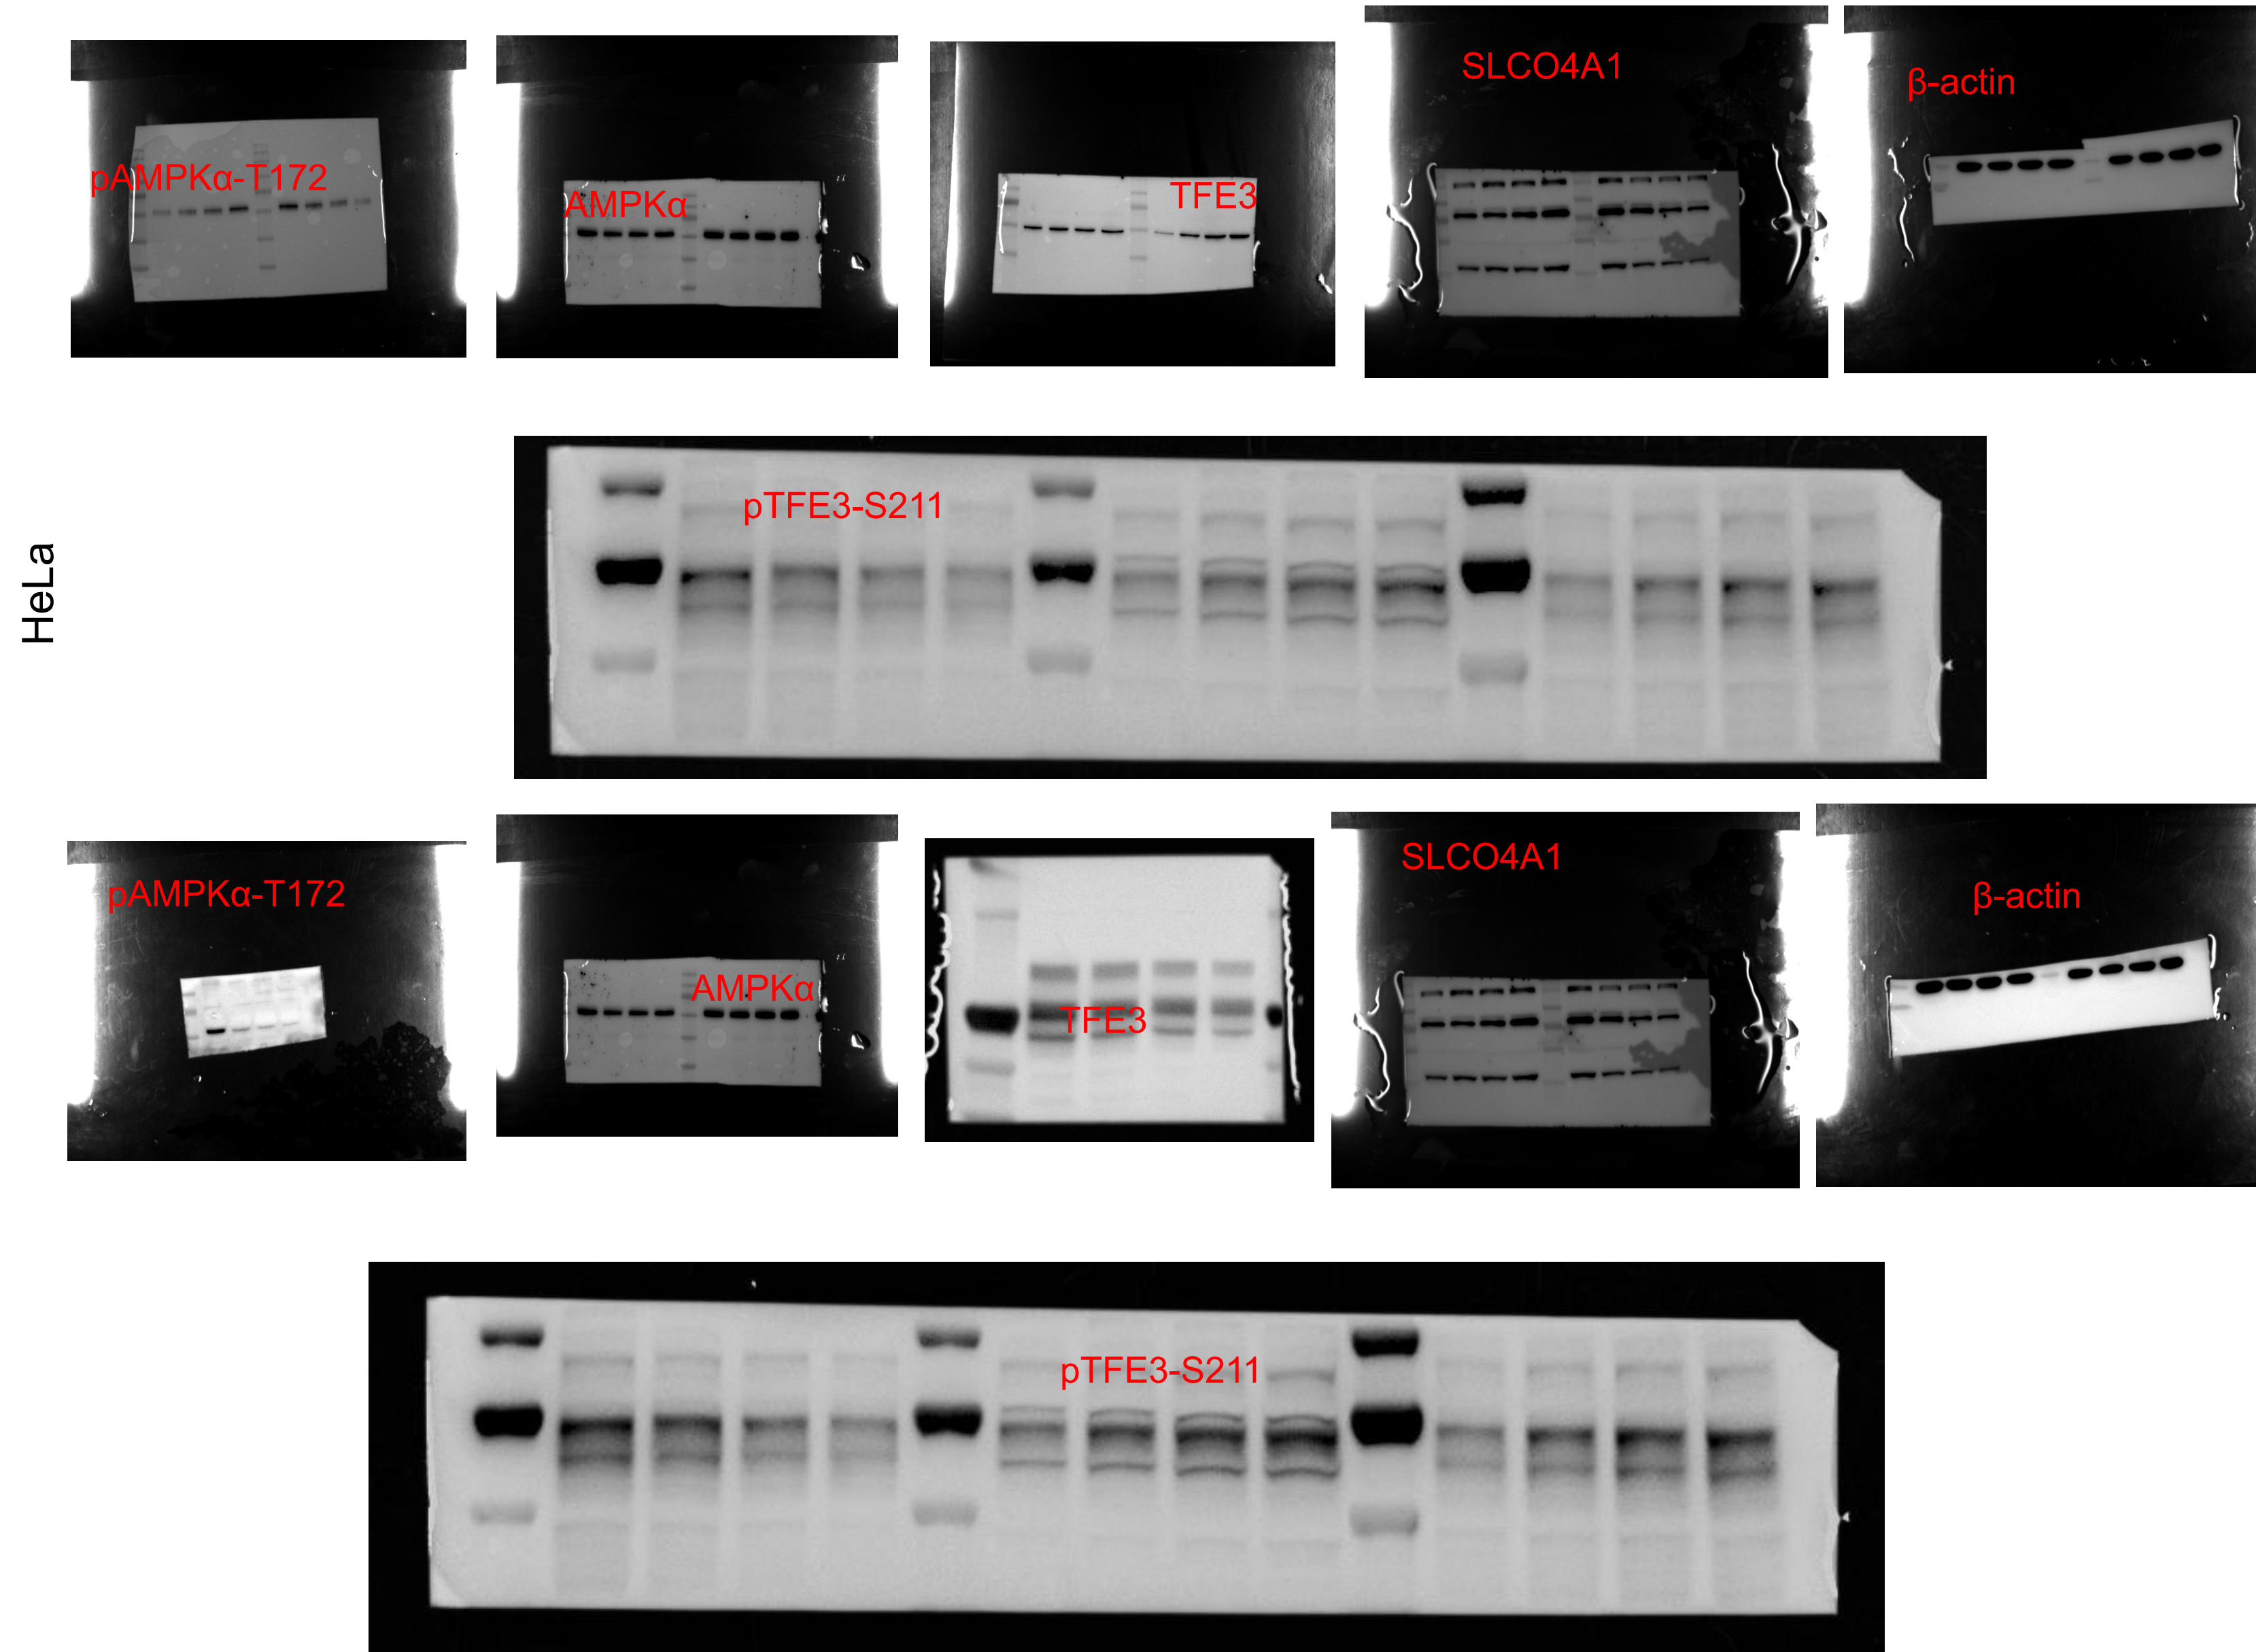

# Figure 3B

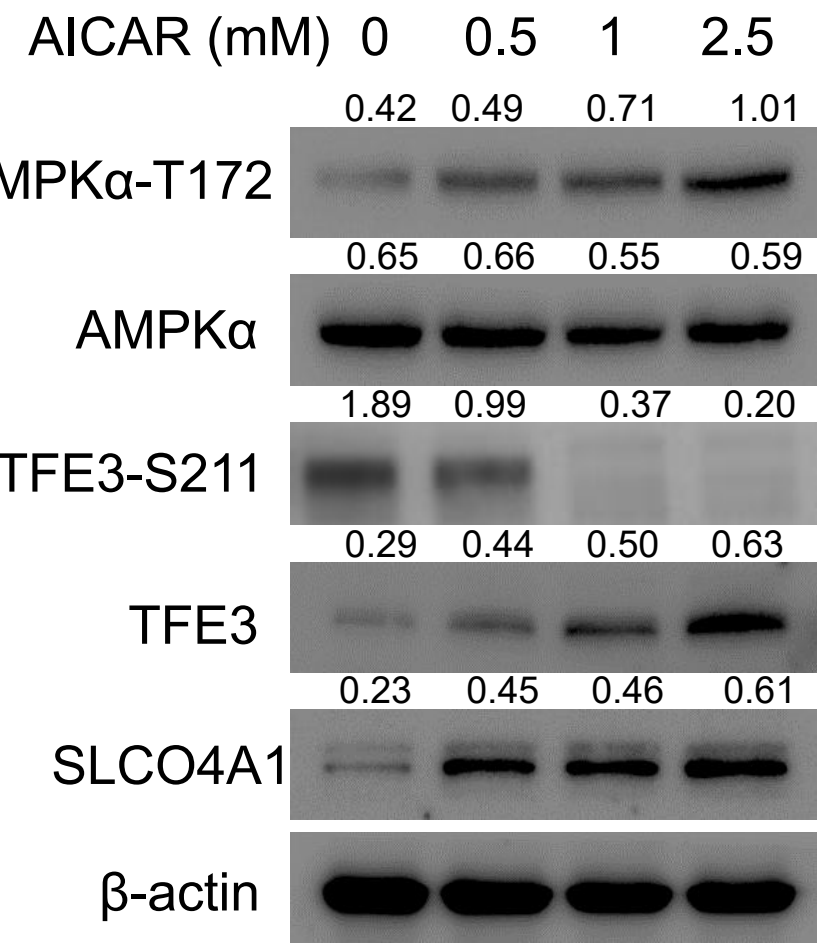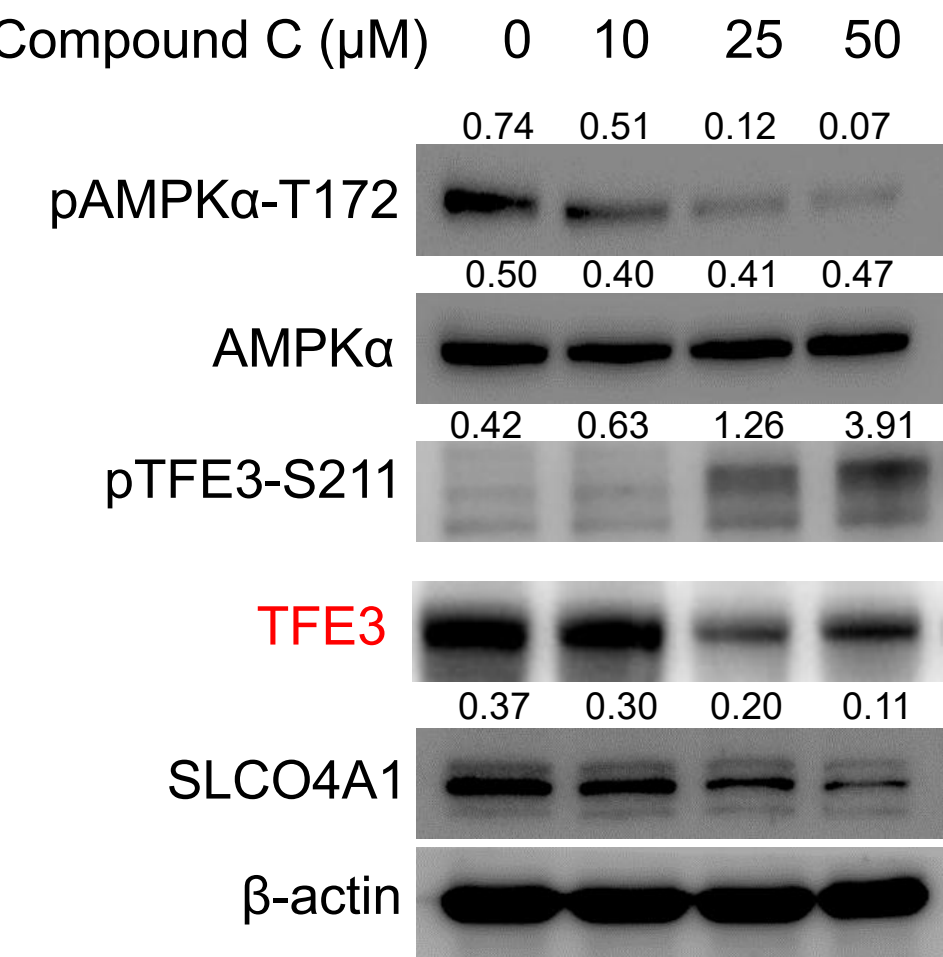

MCF-7

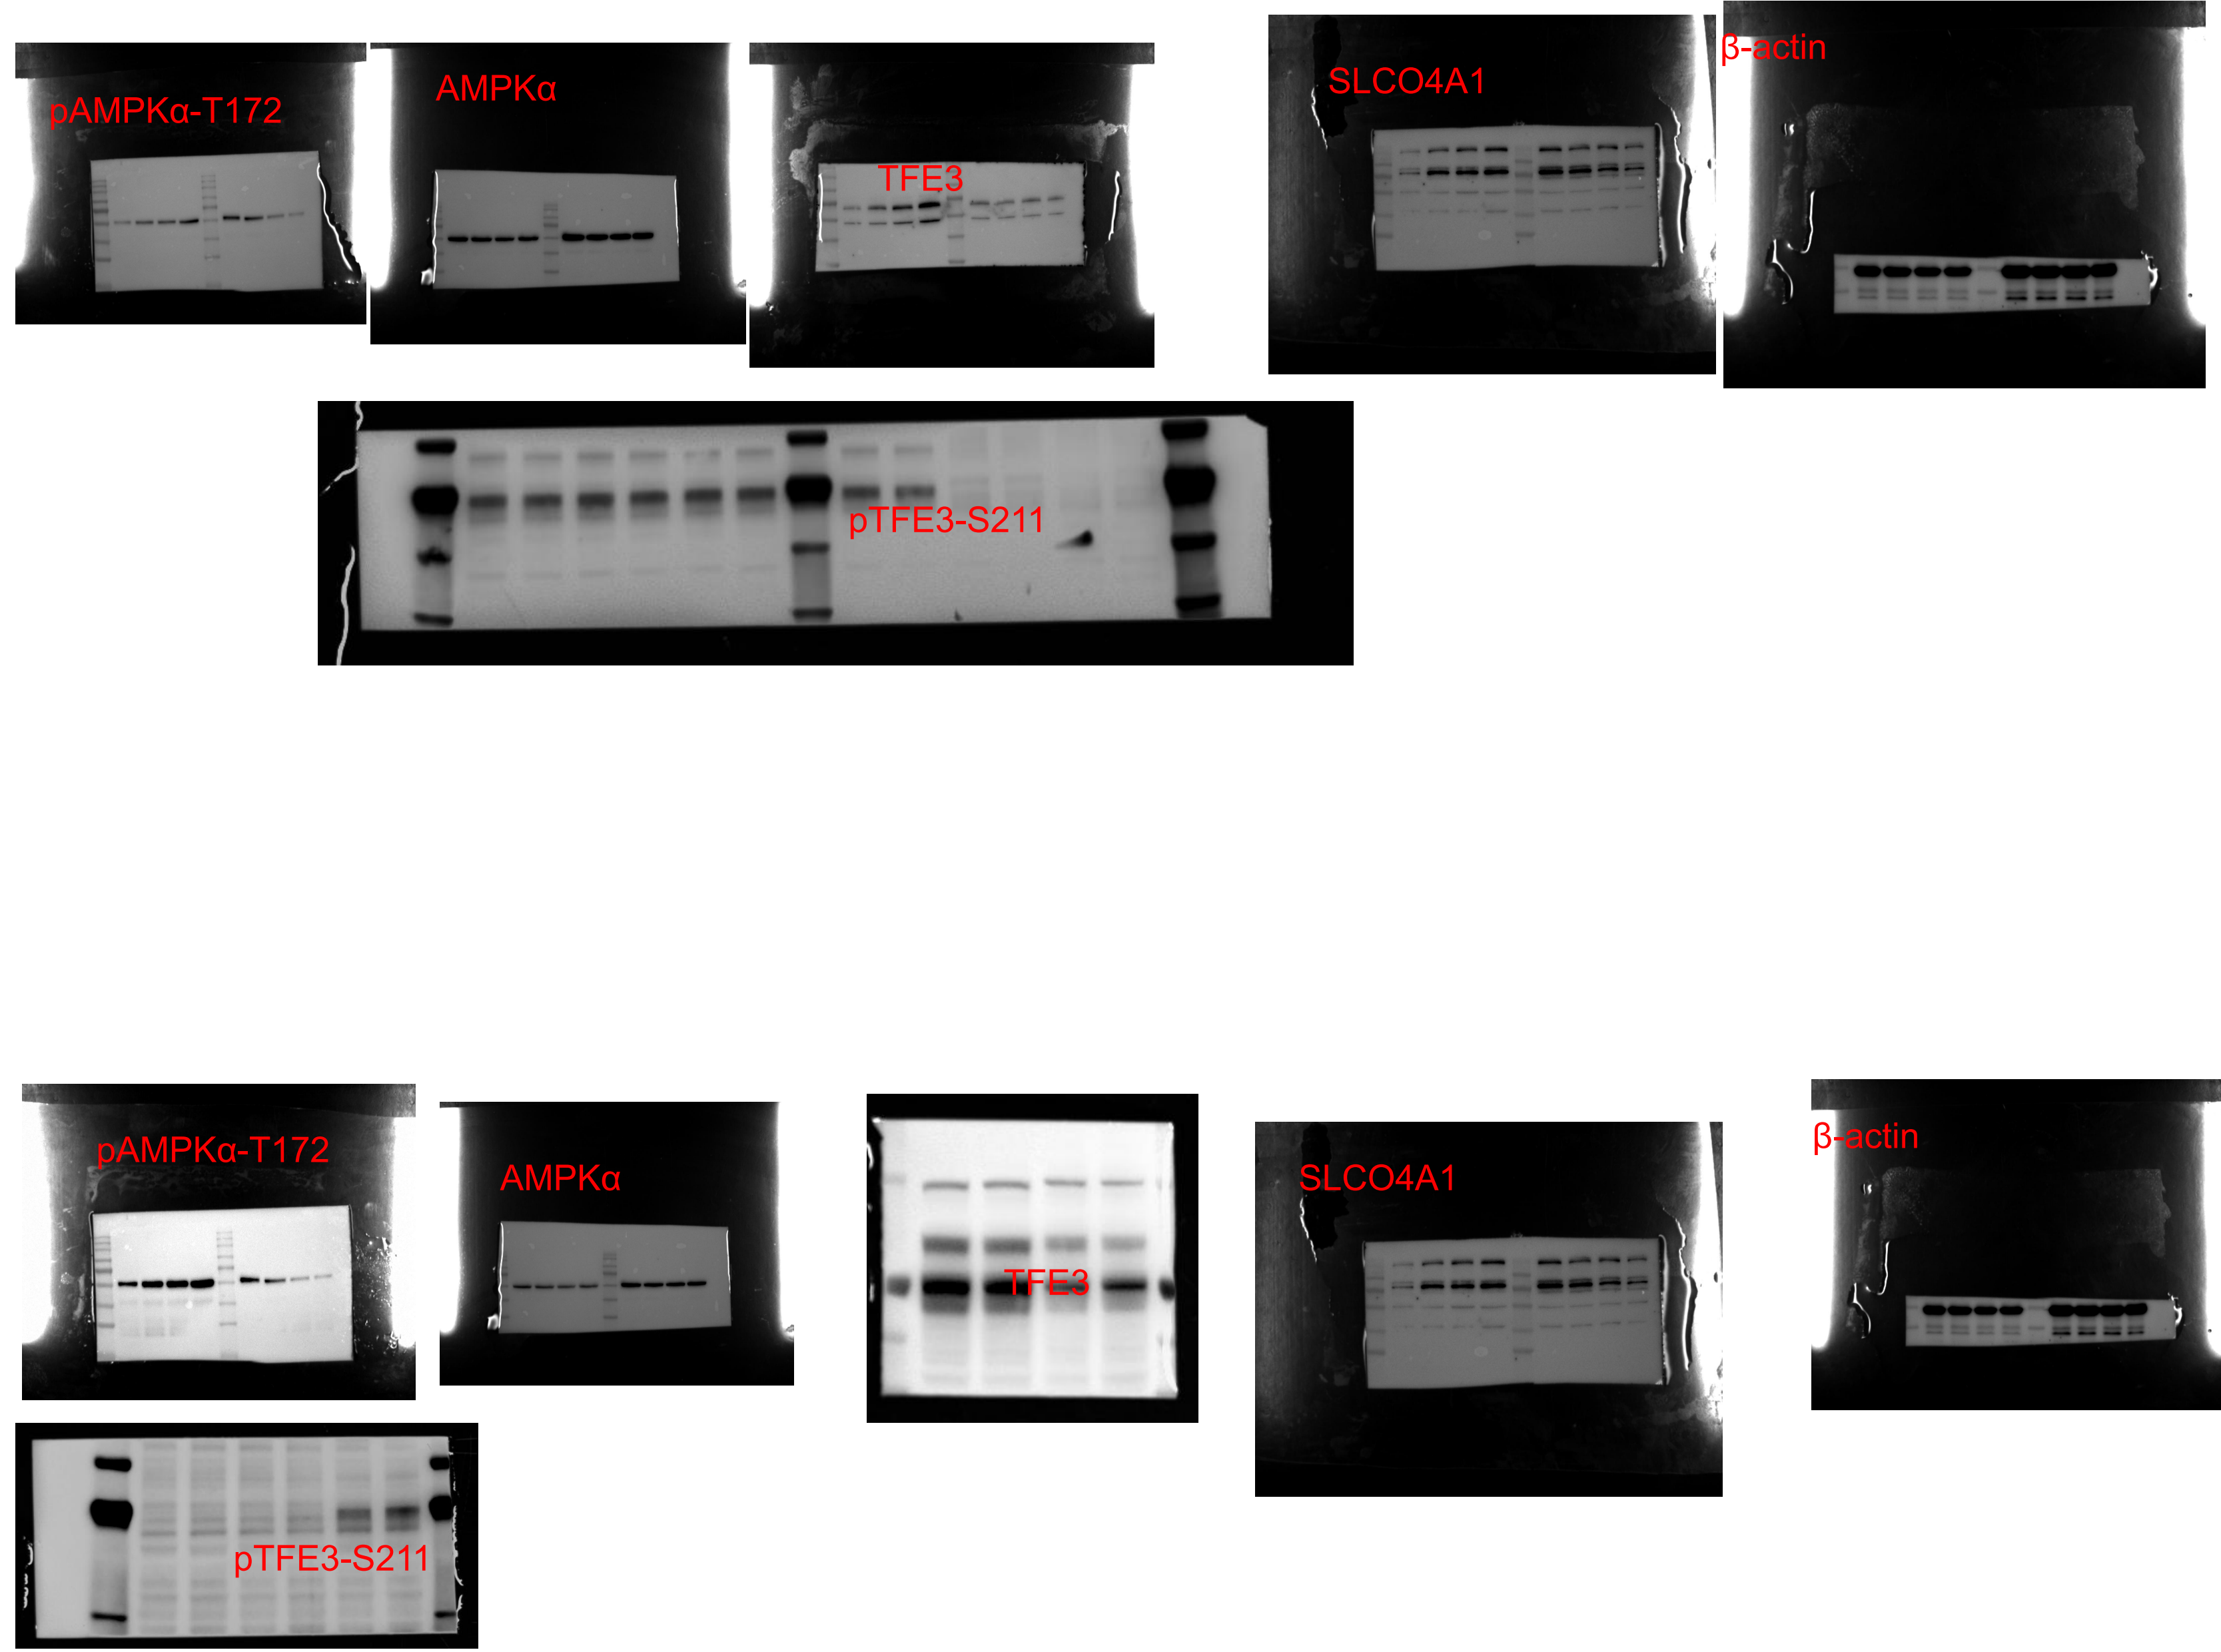

Figure 3E

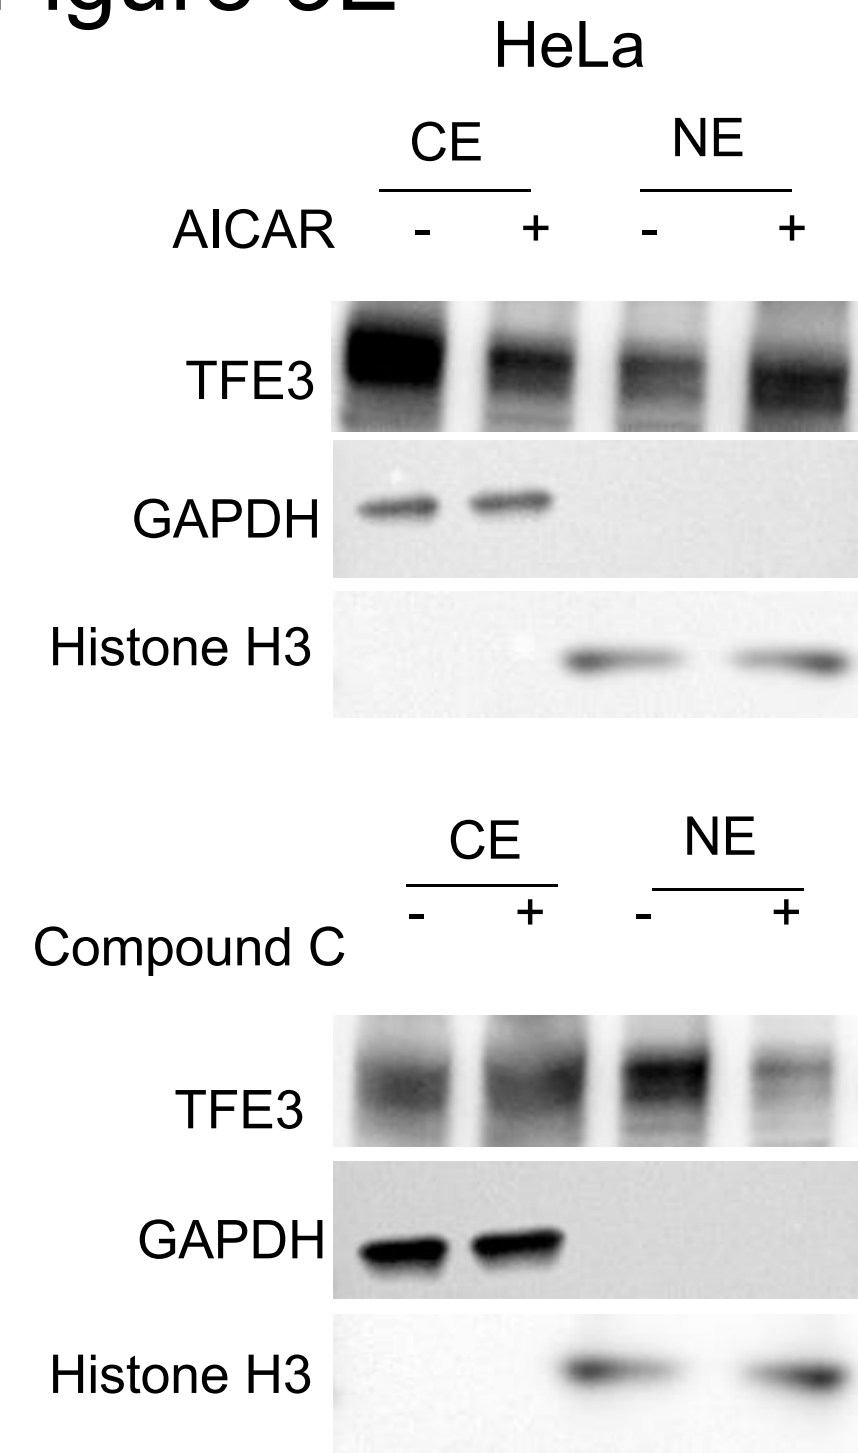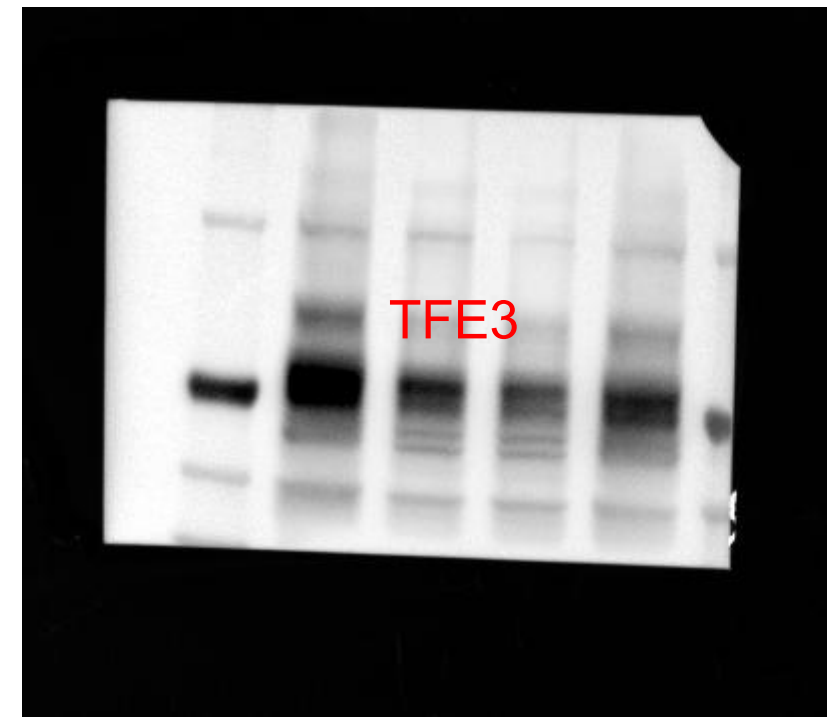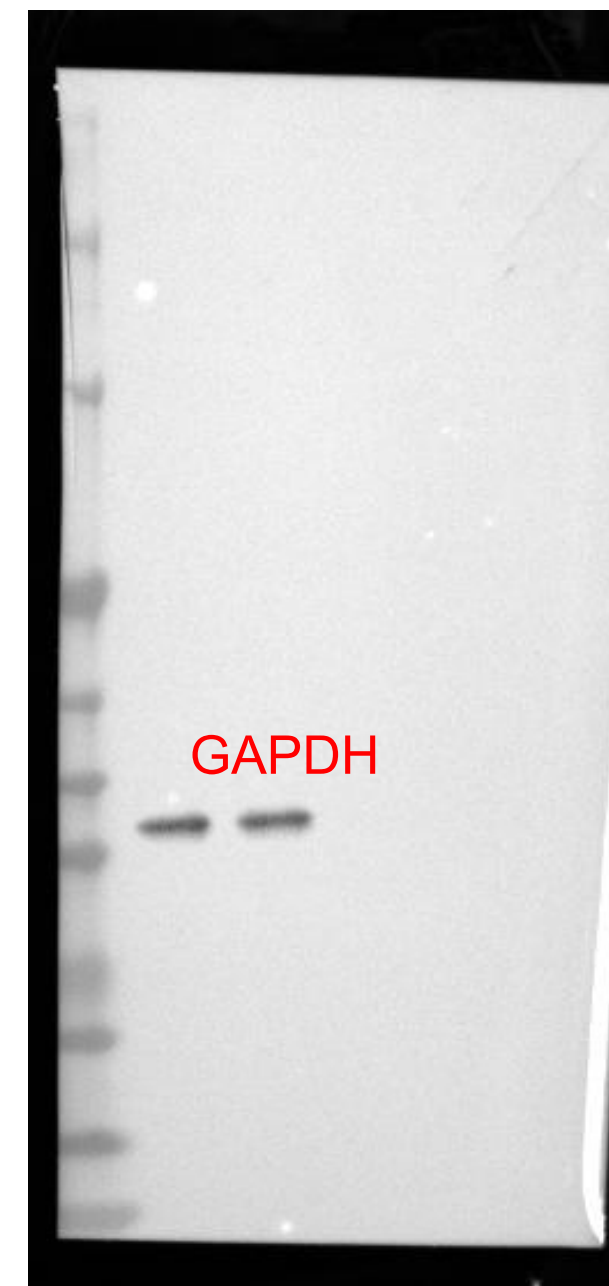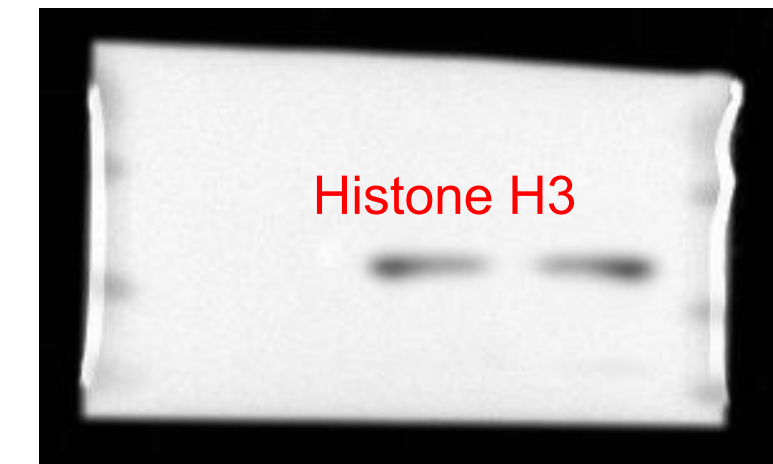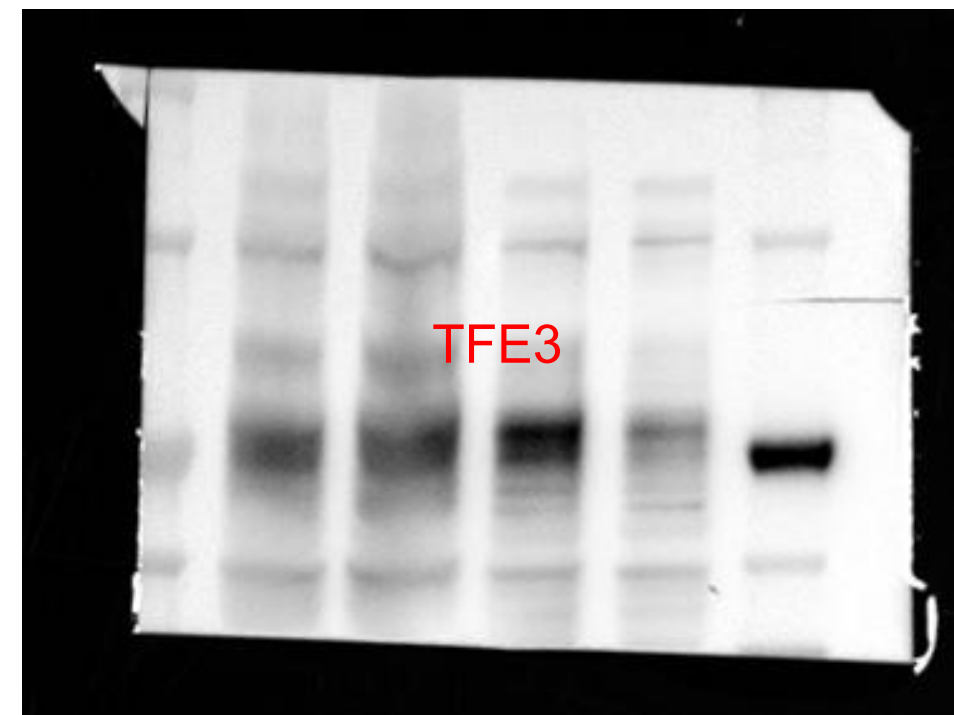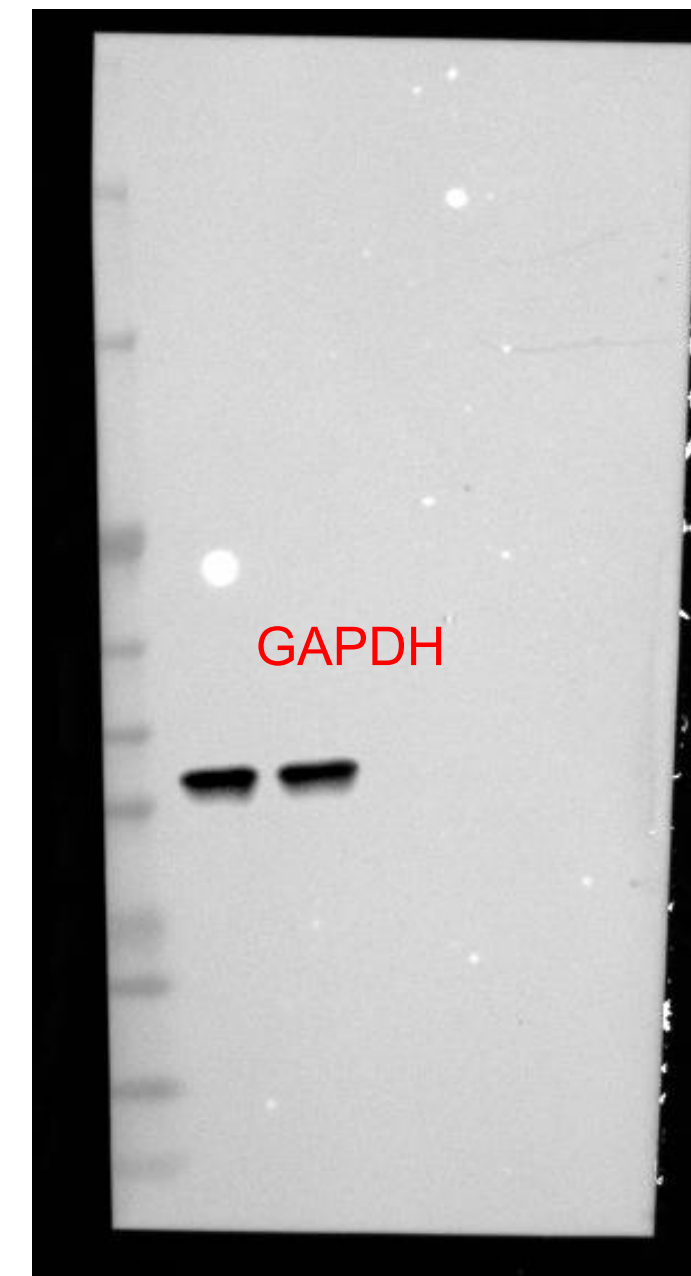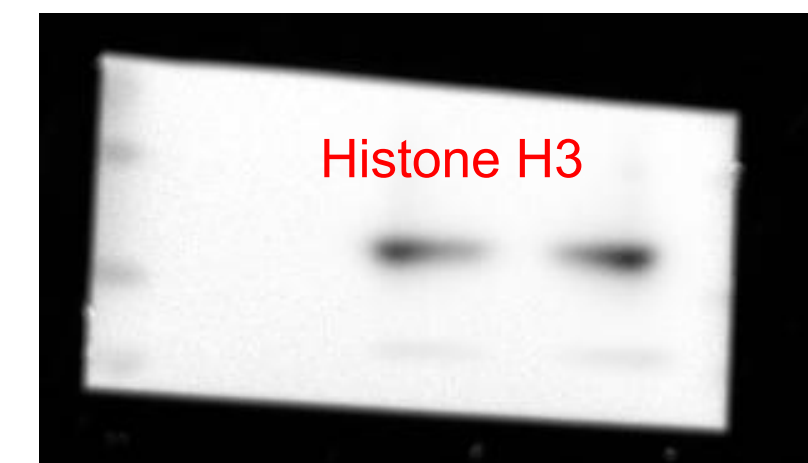

Figure 3F

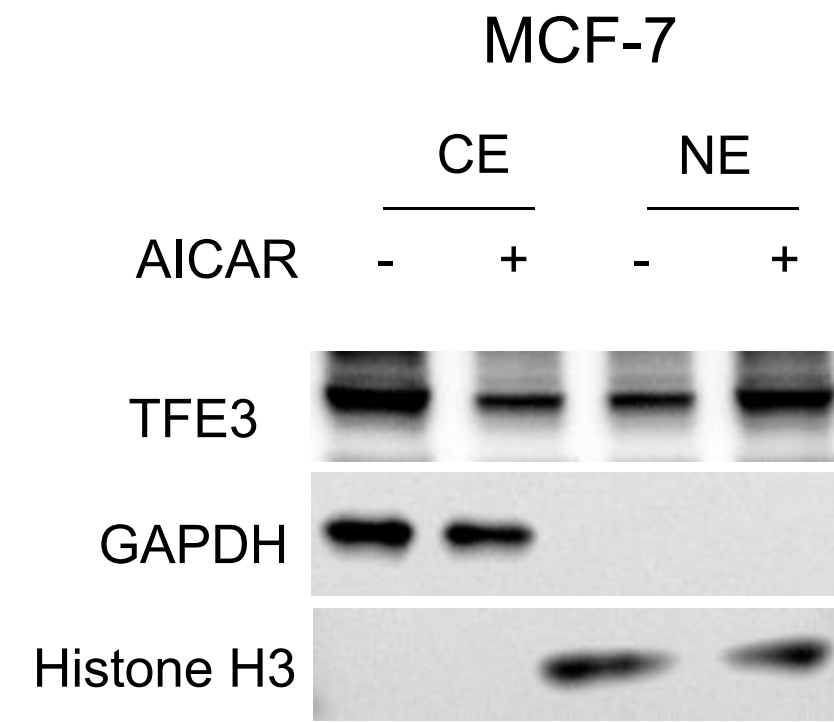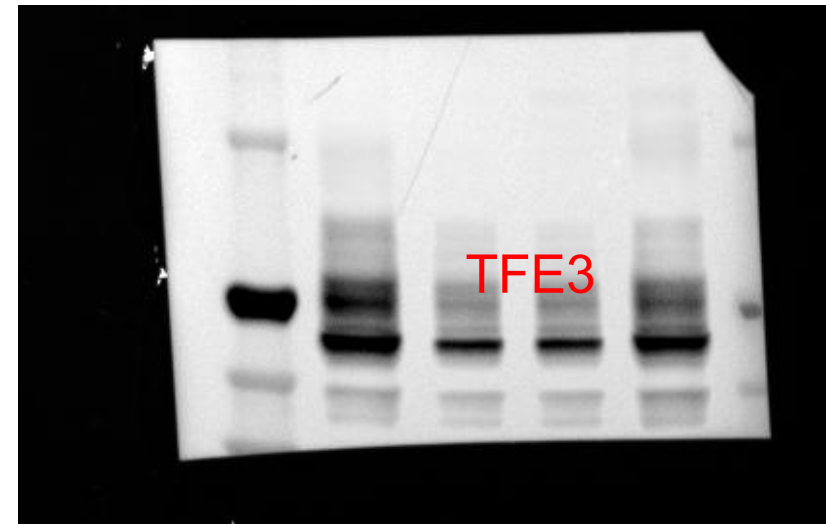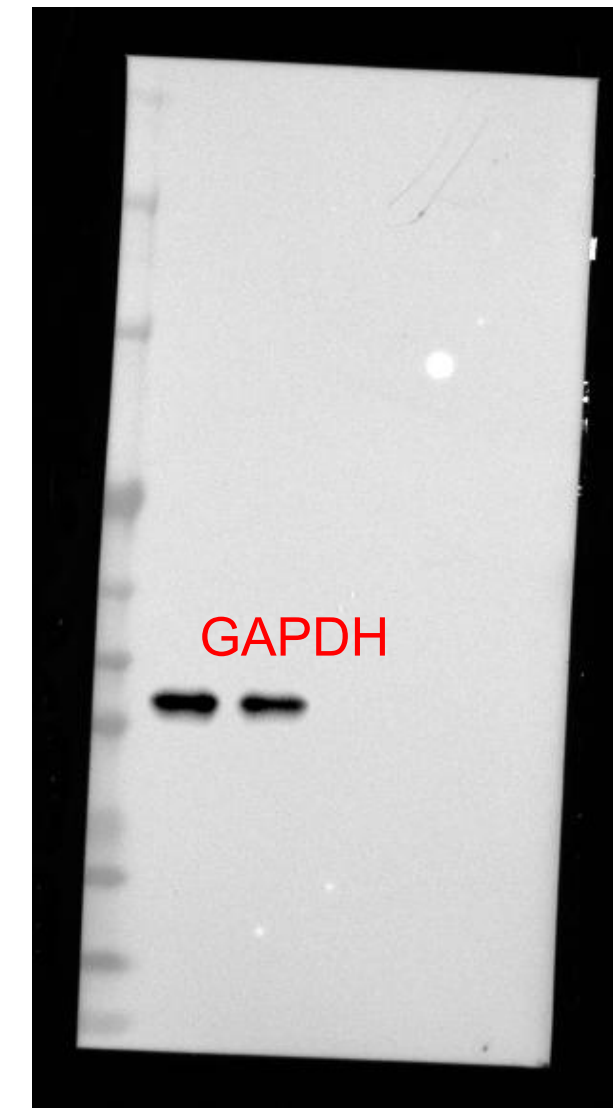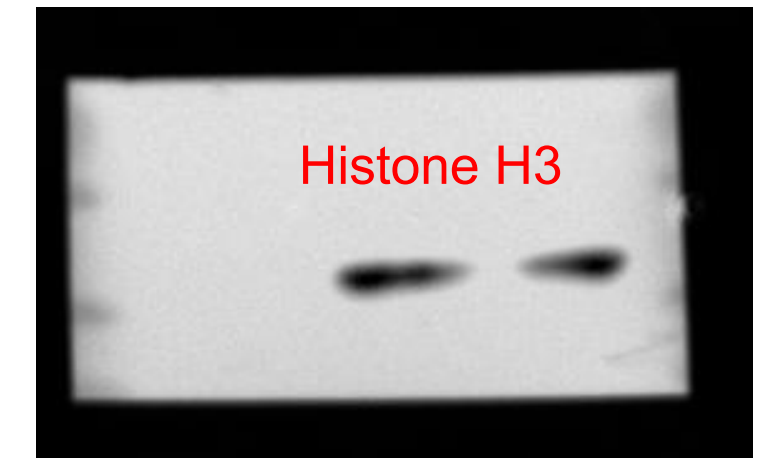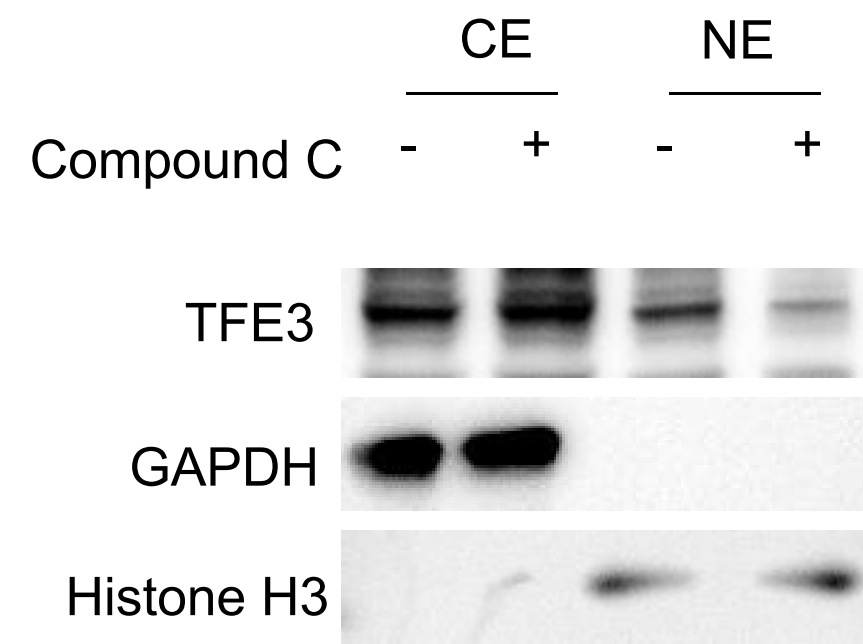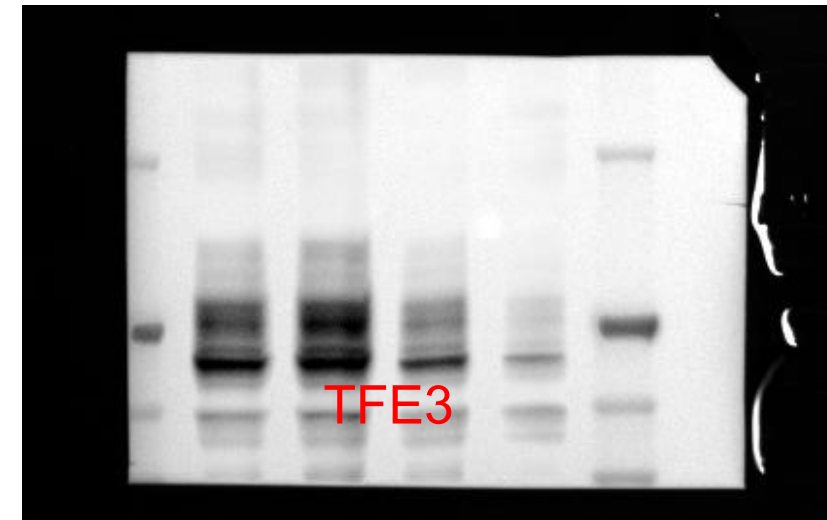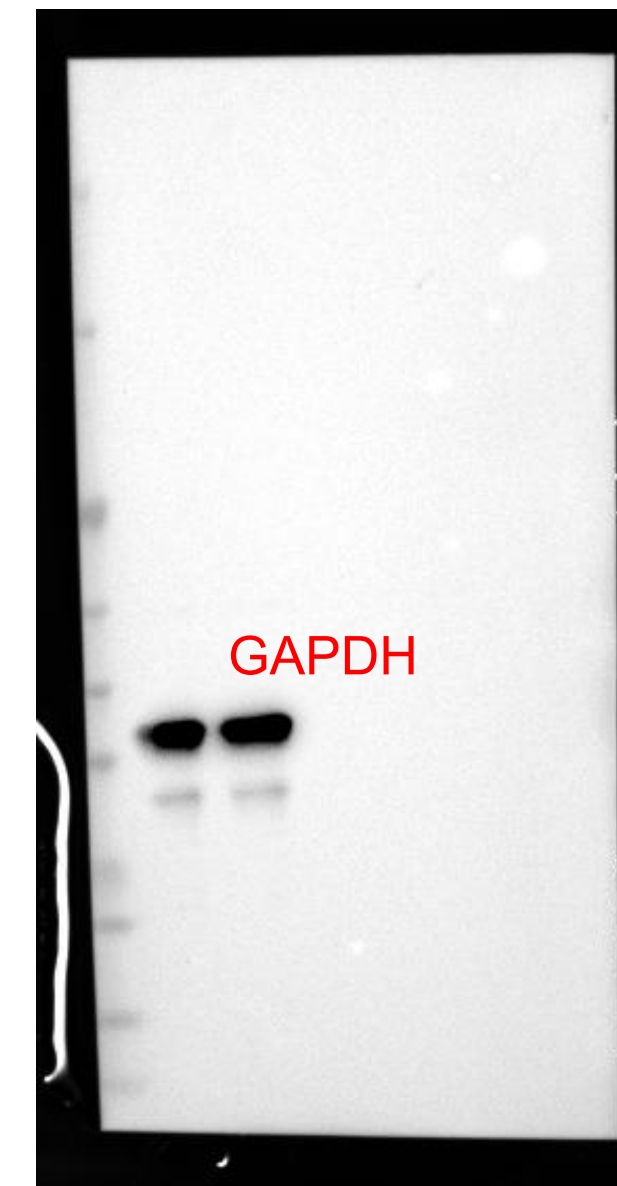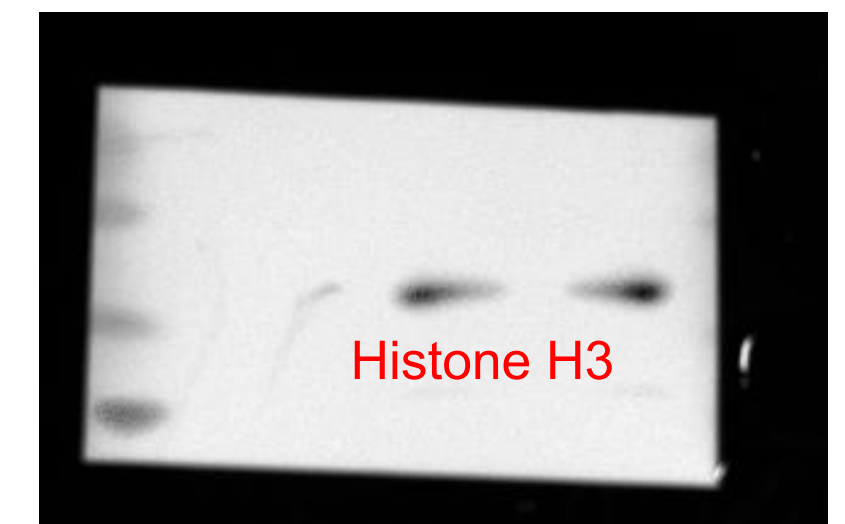

Figure S4C

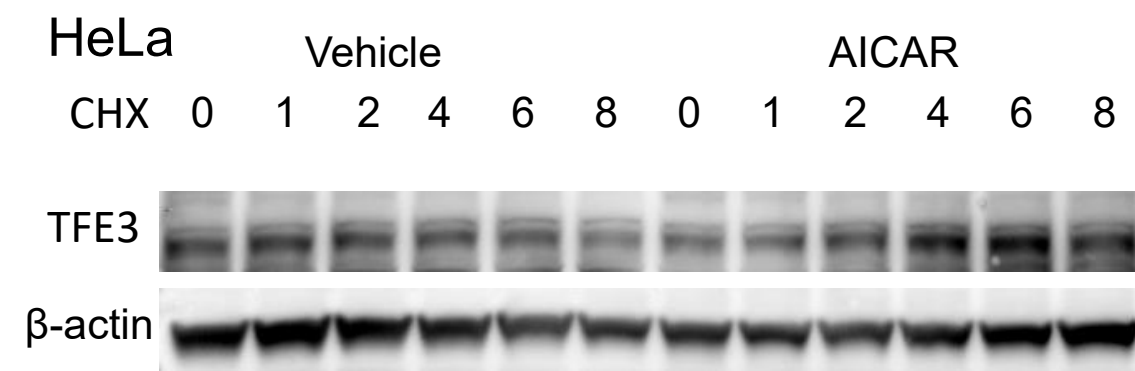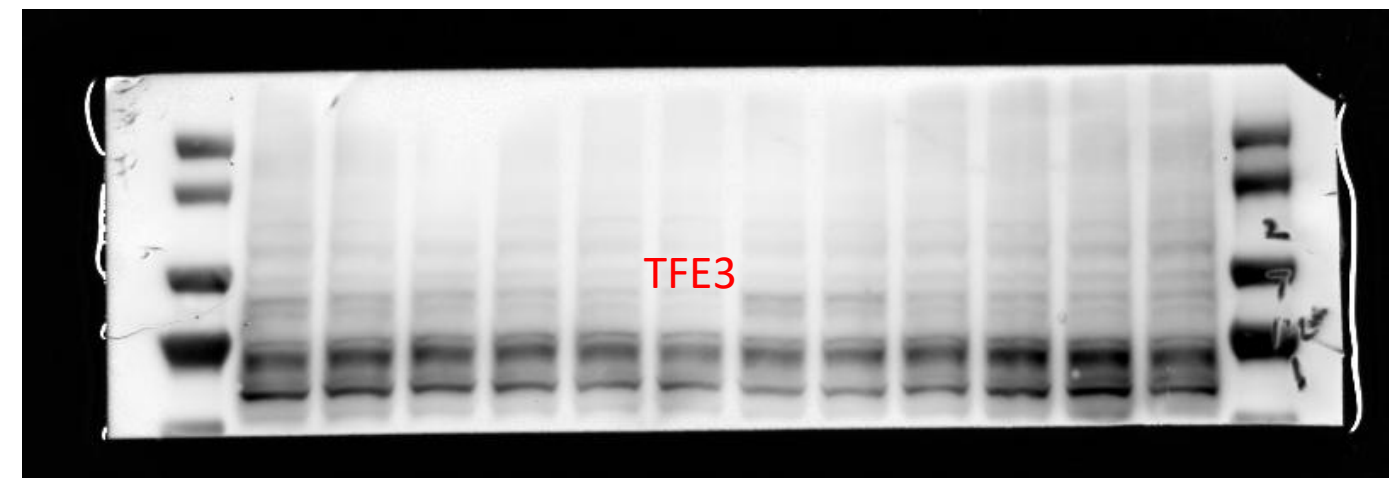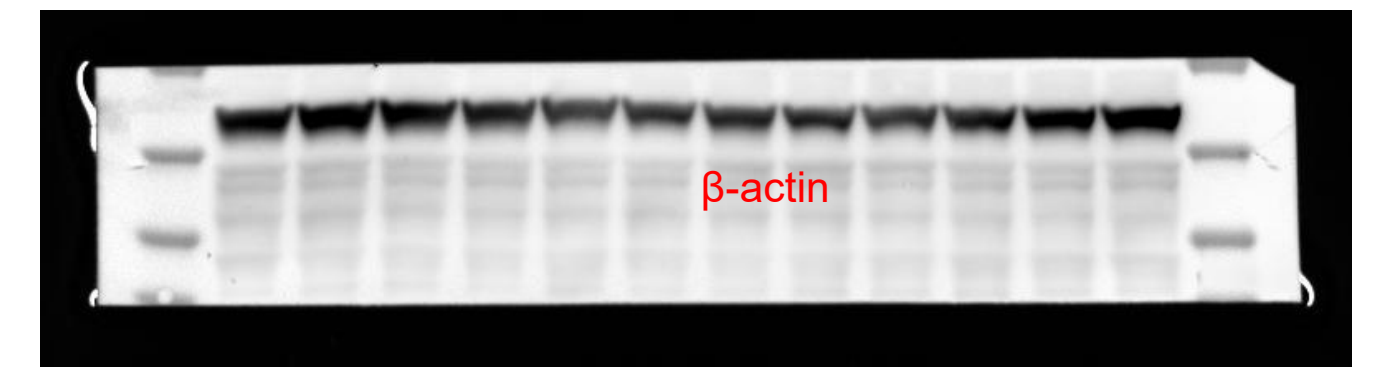

Figure S4D

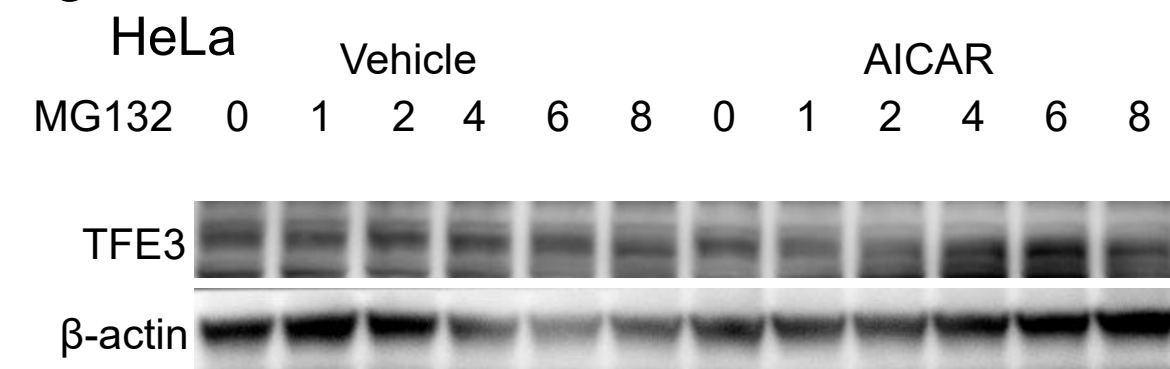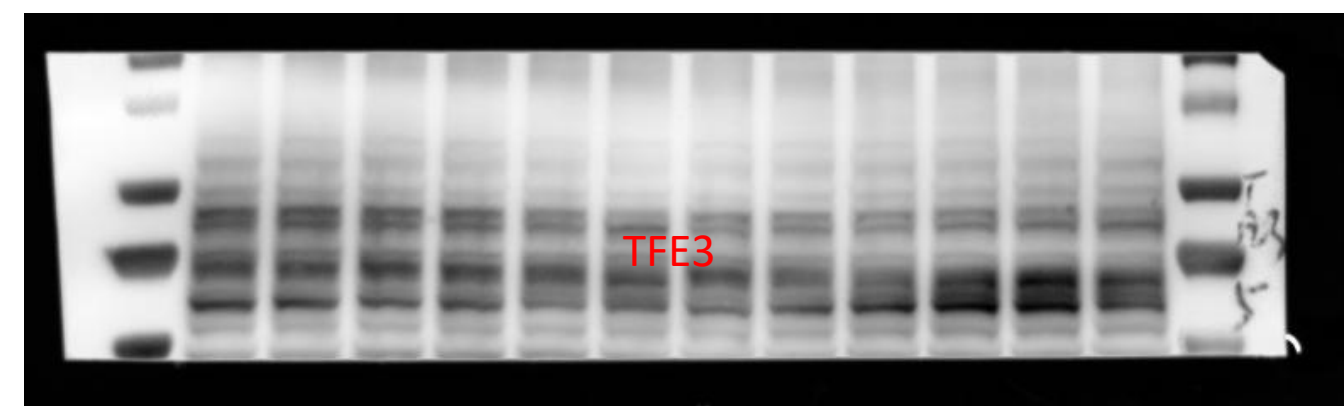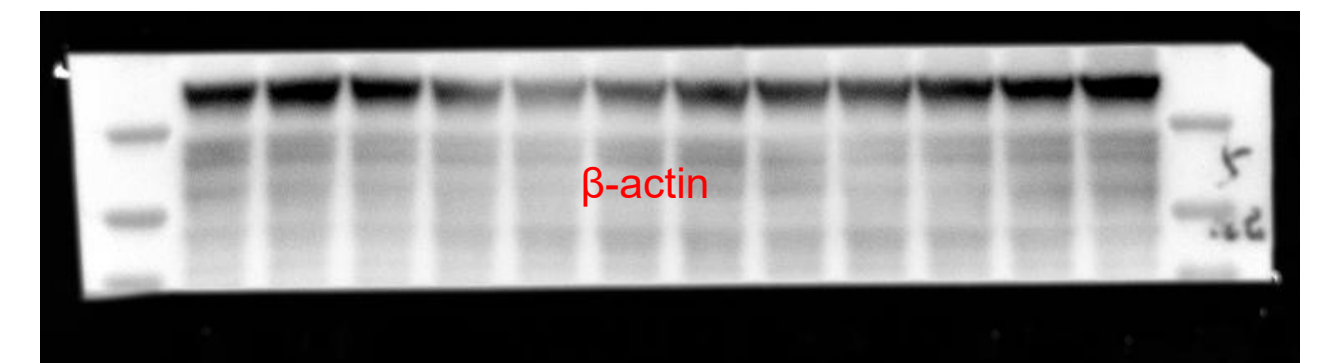

Figure S4H

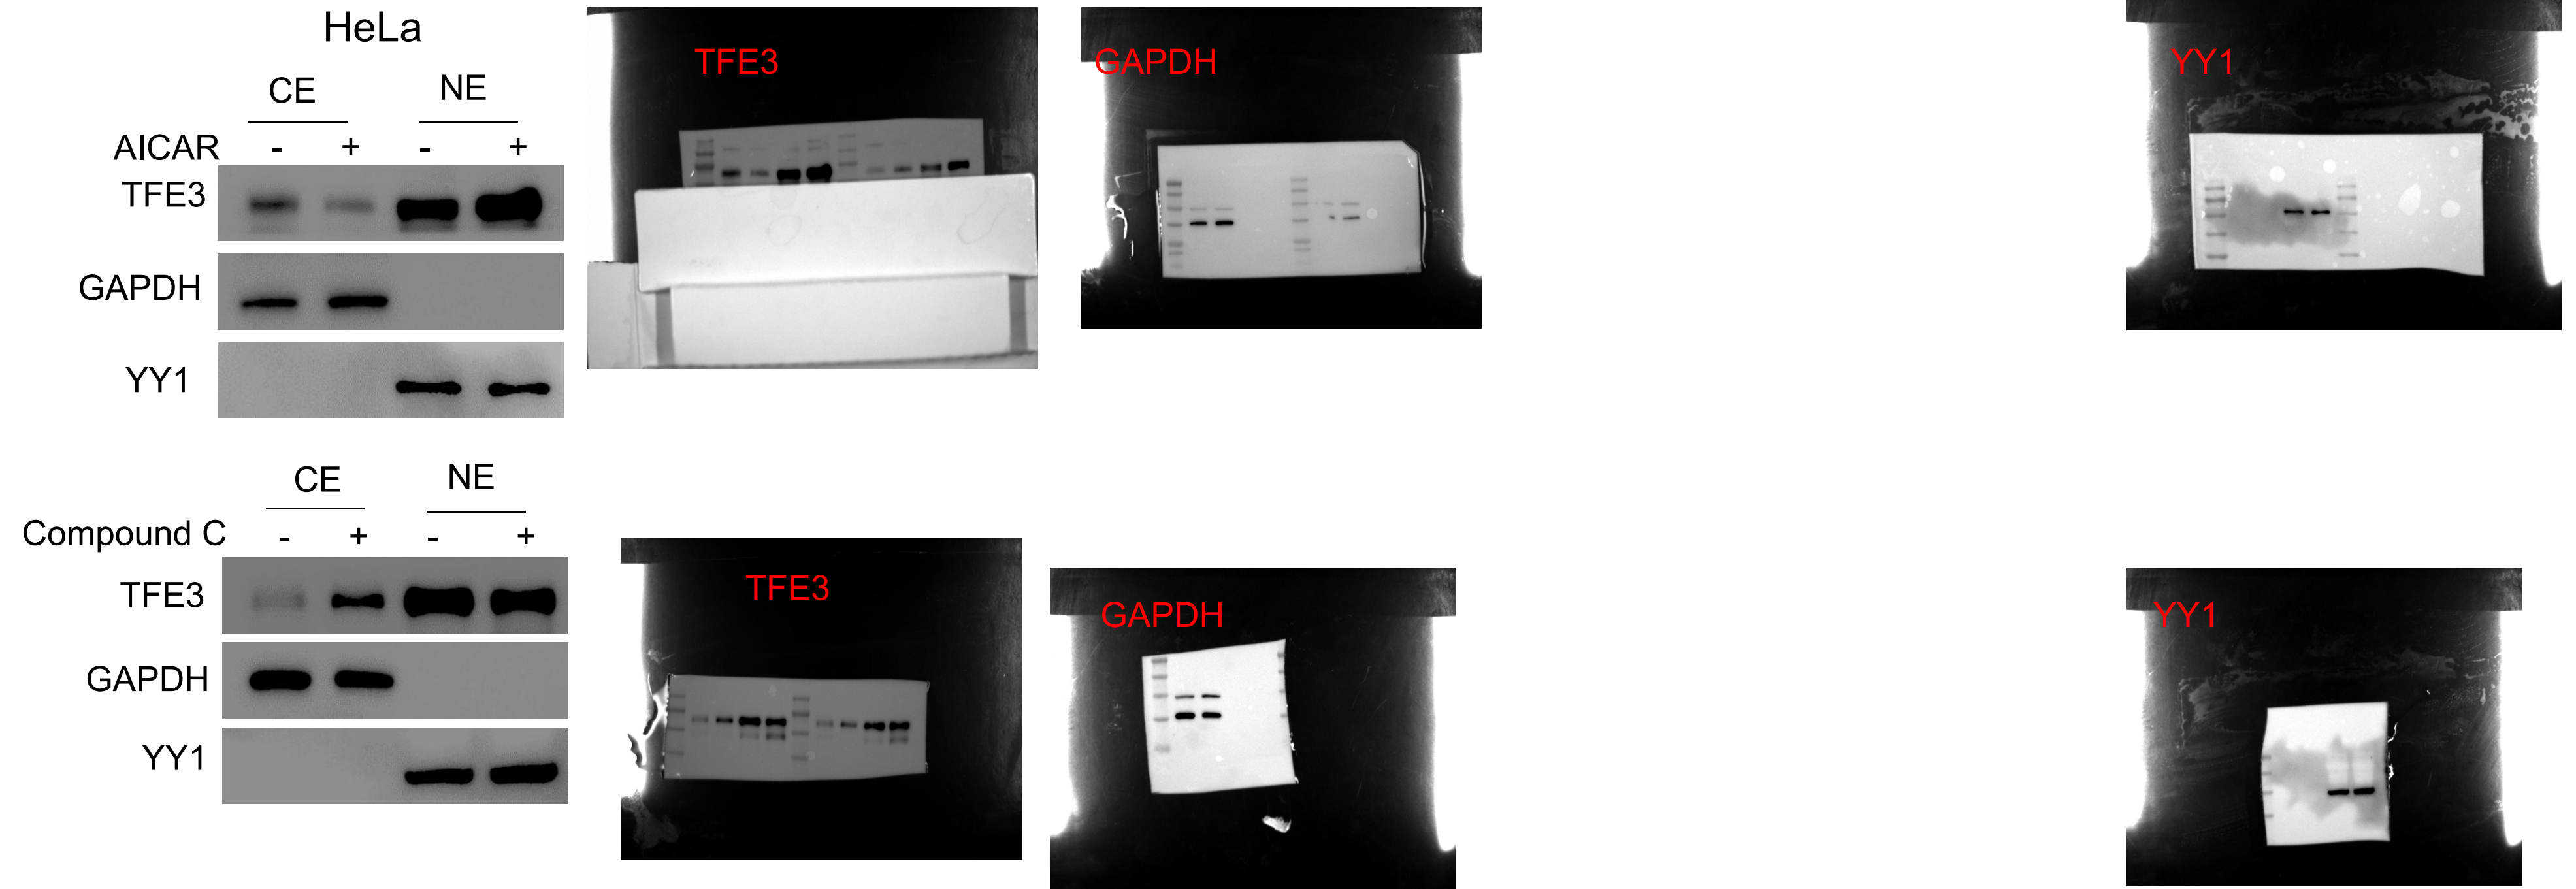

Figure S4I

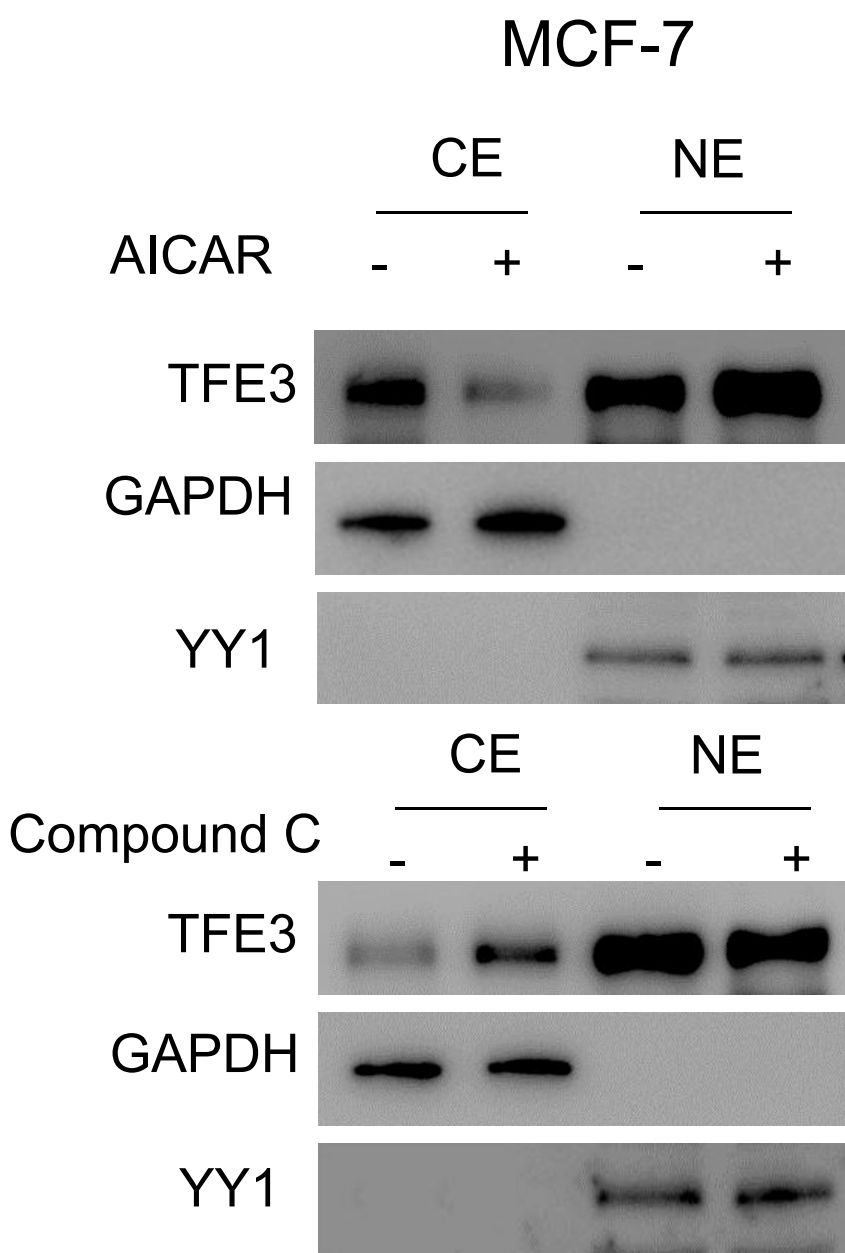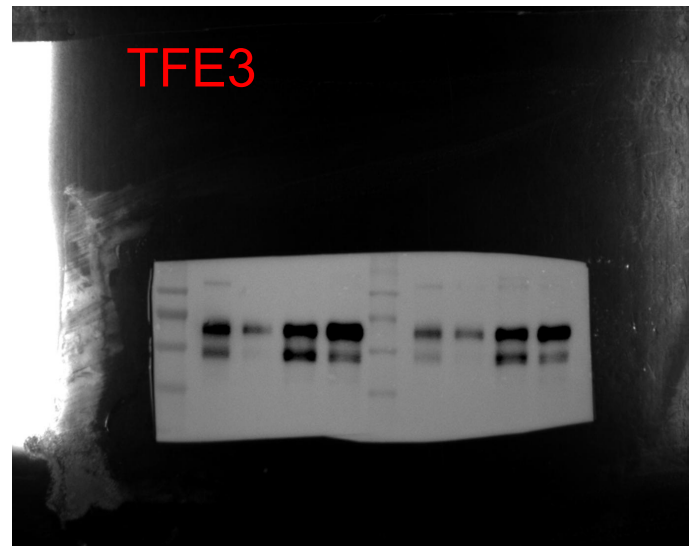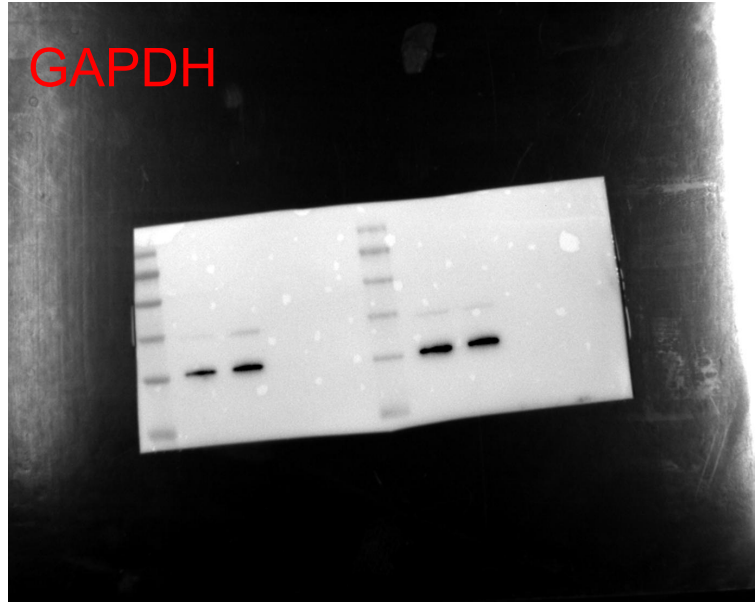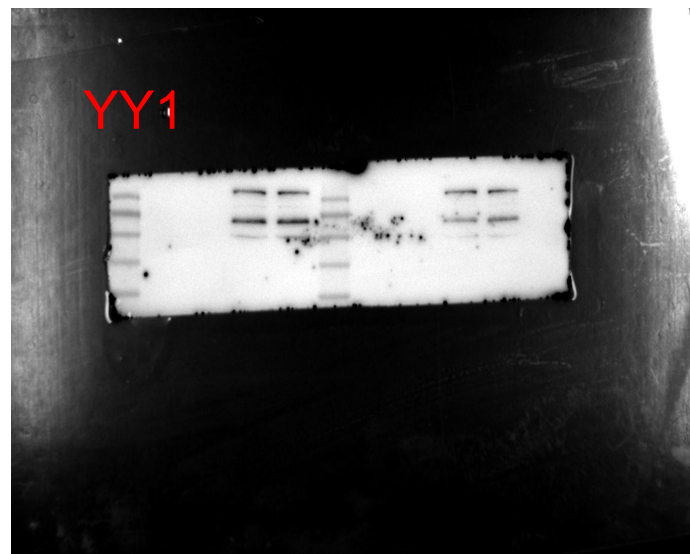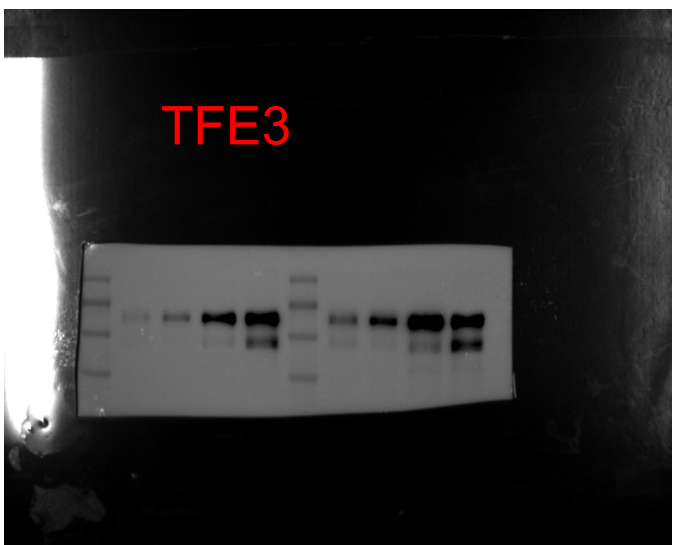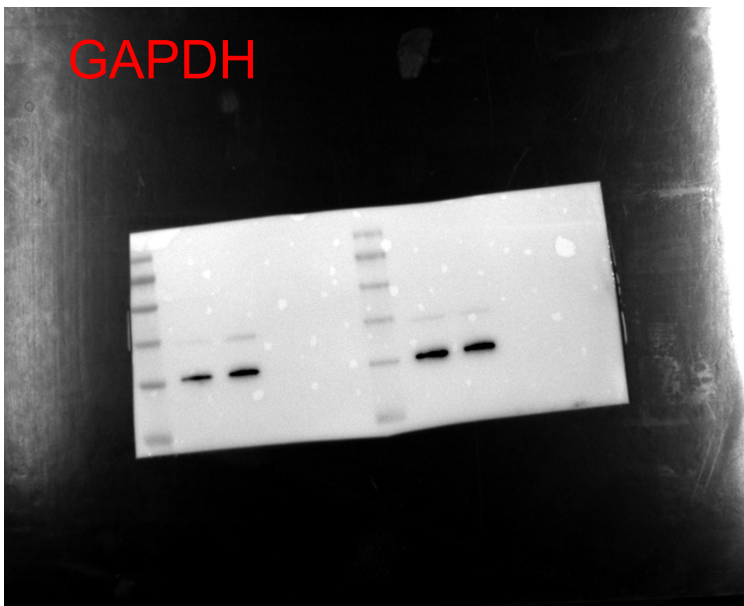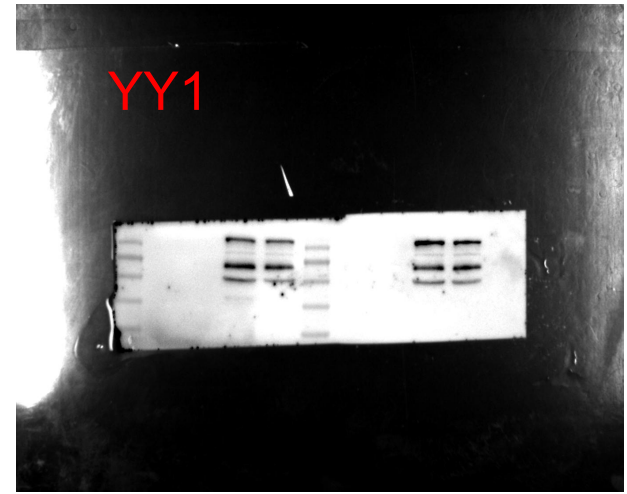

Figure S4J

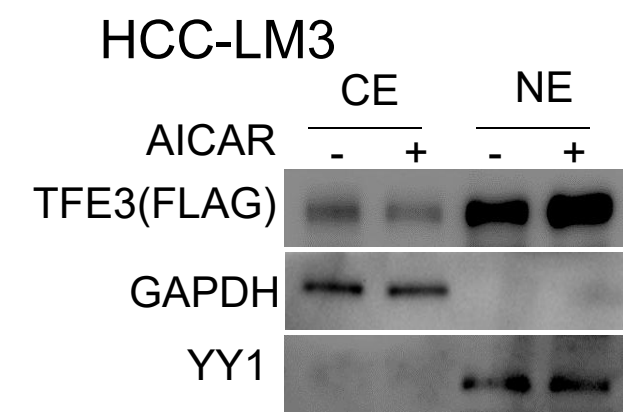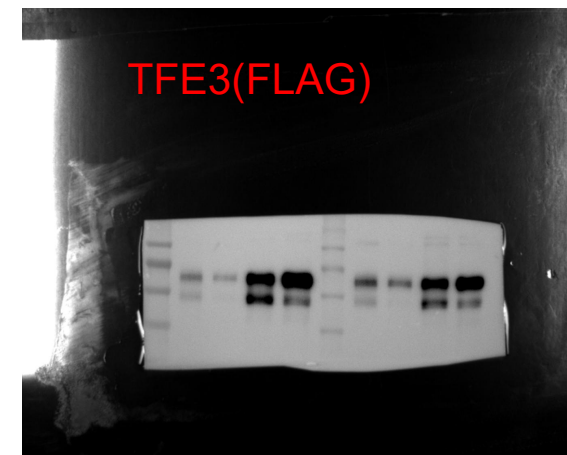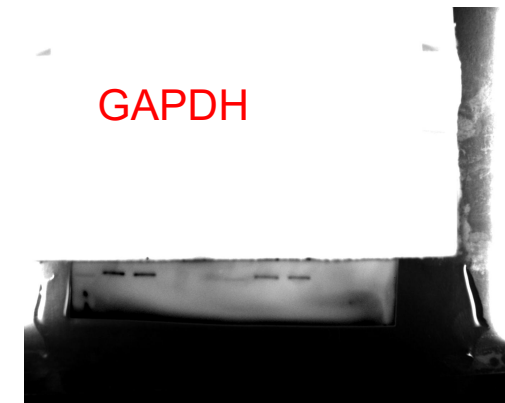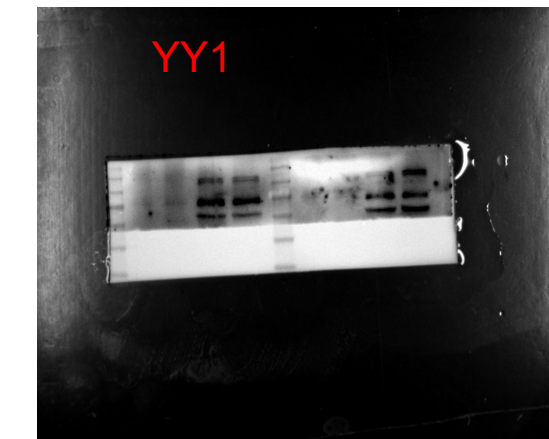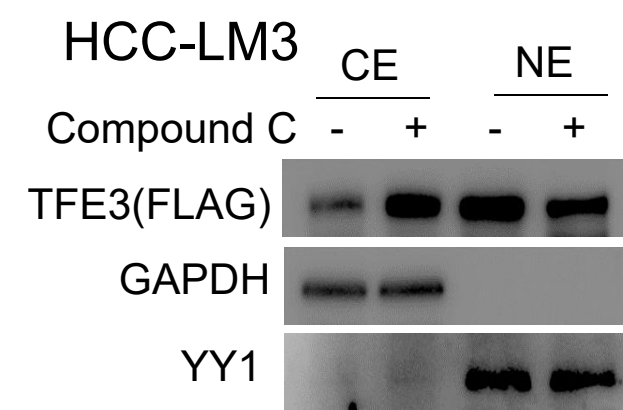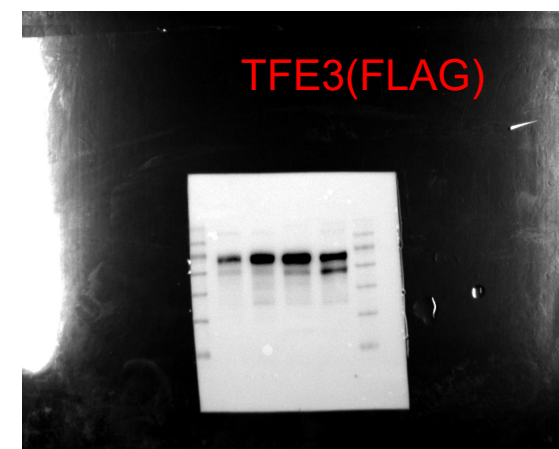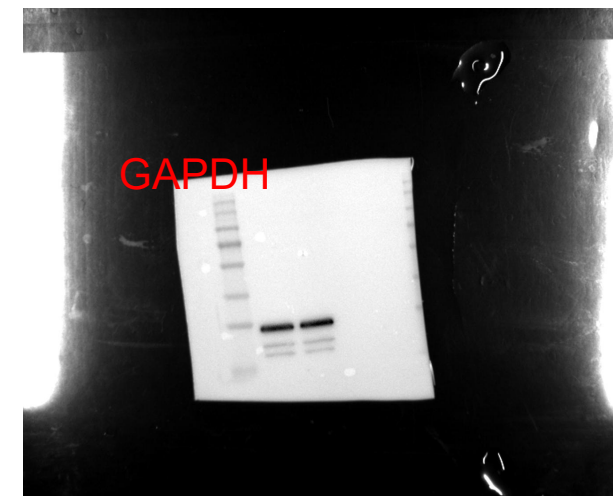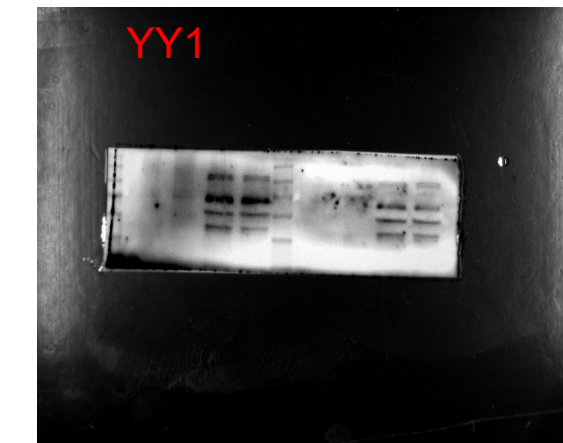

Figure S4L

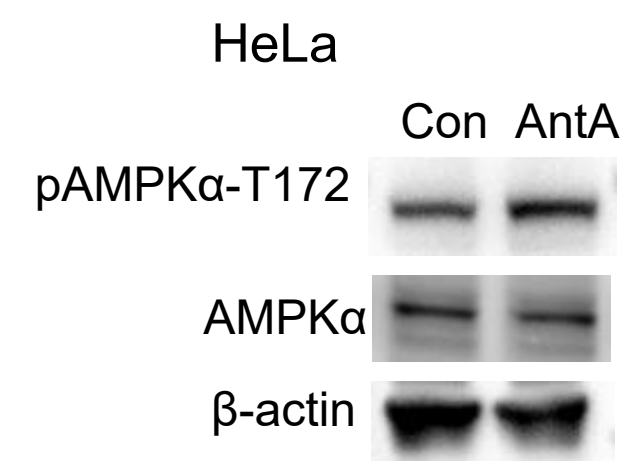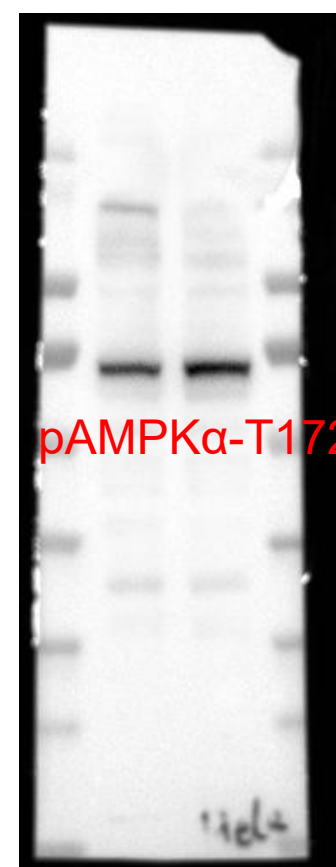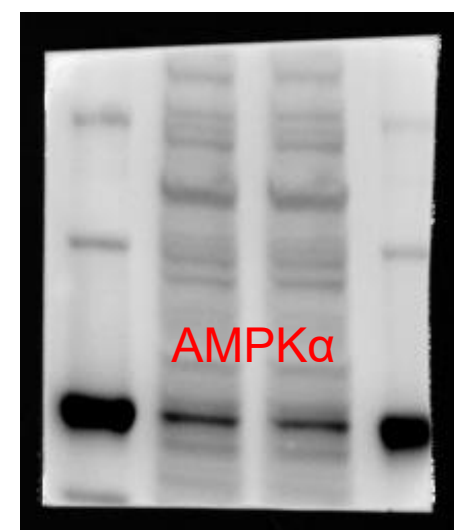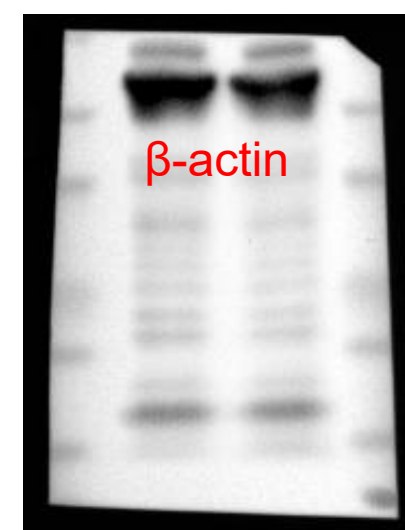

Figure S4N

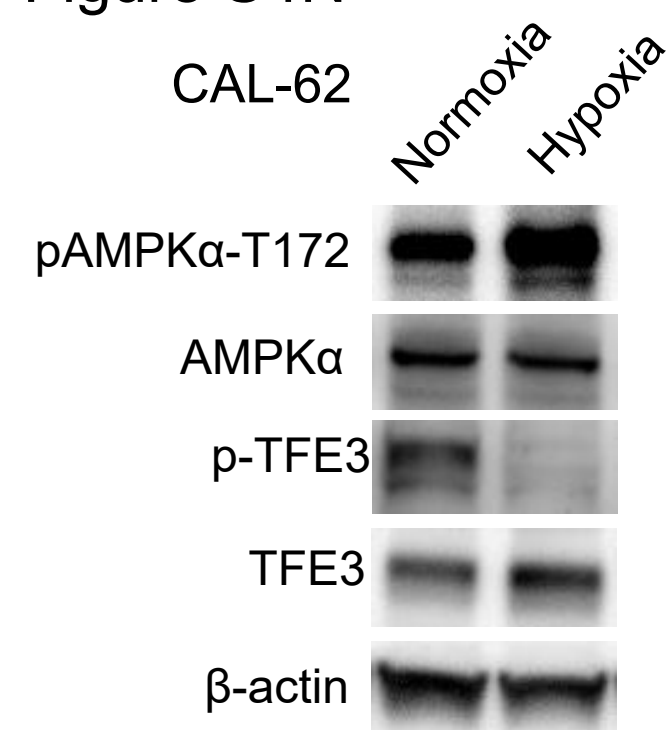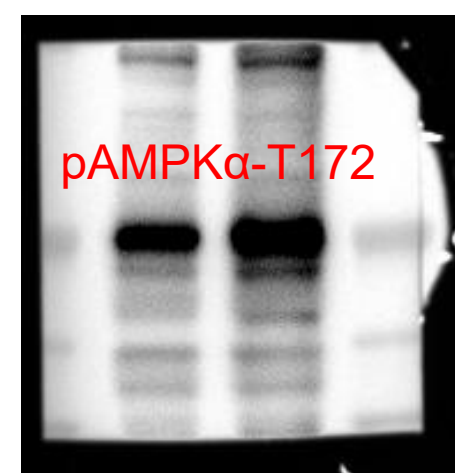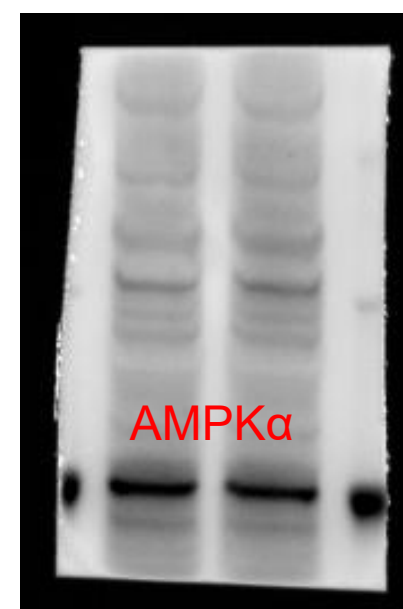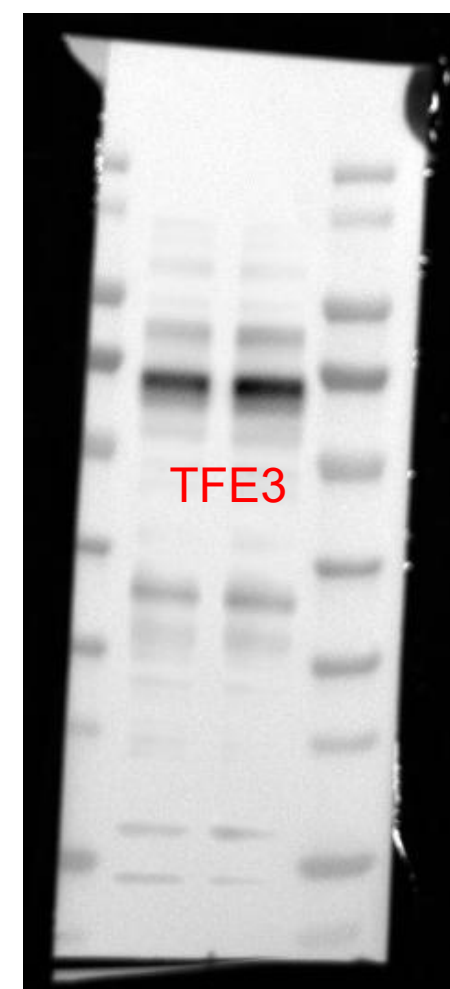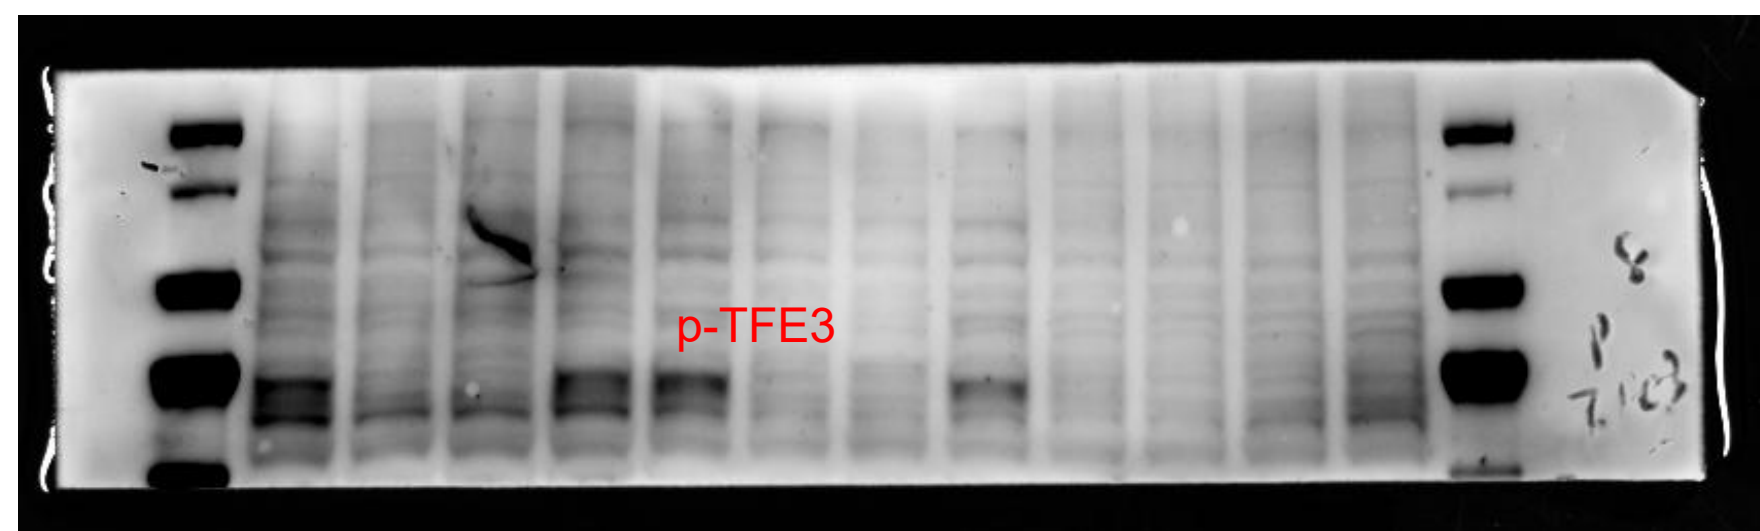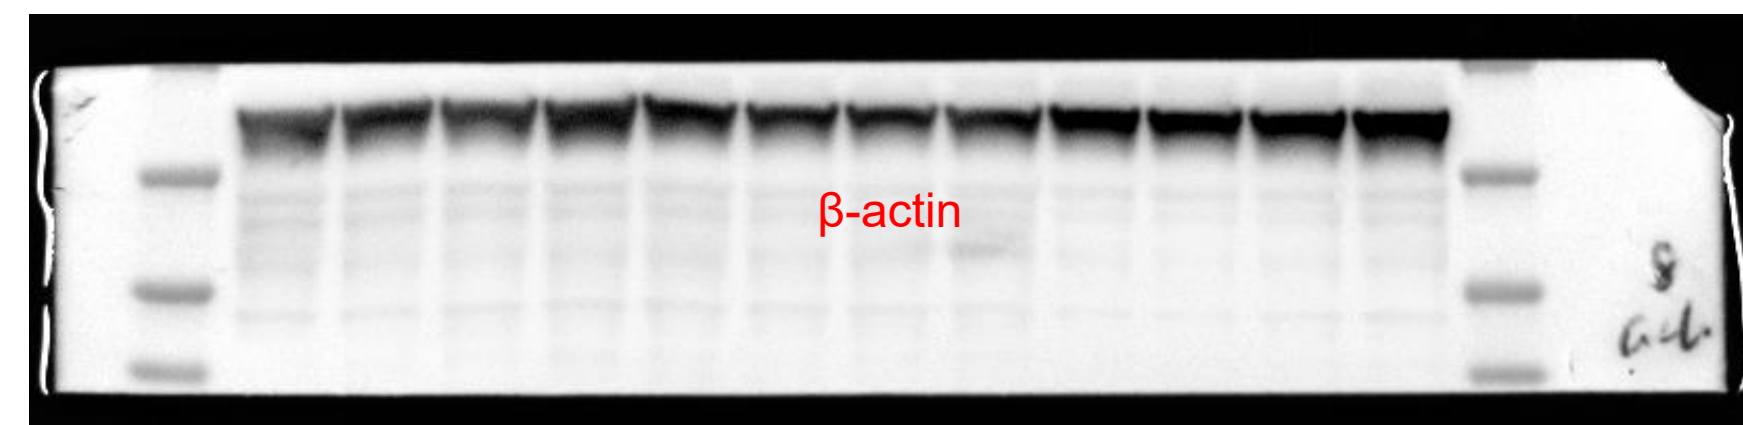

Figure 4A

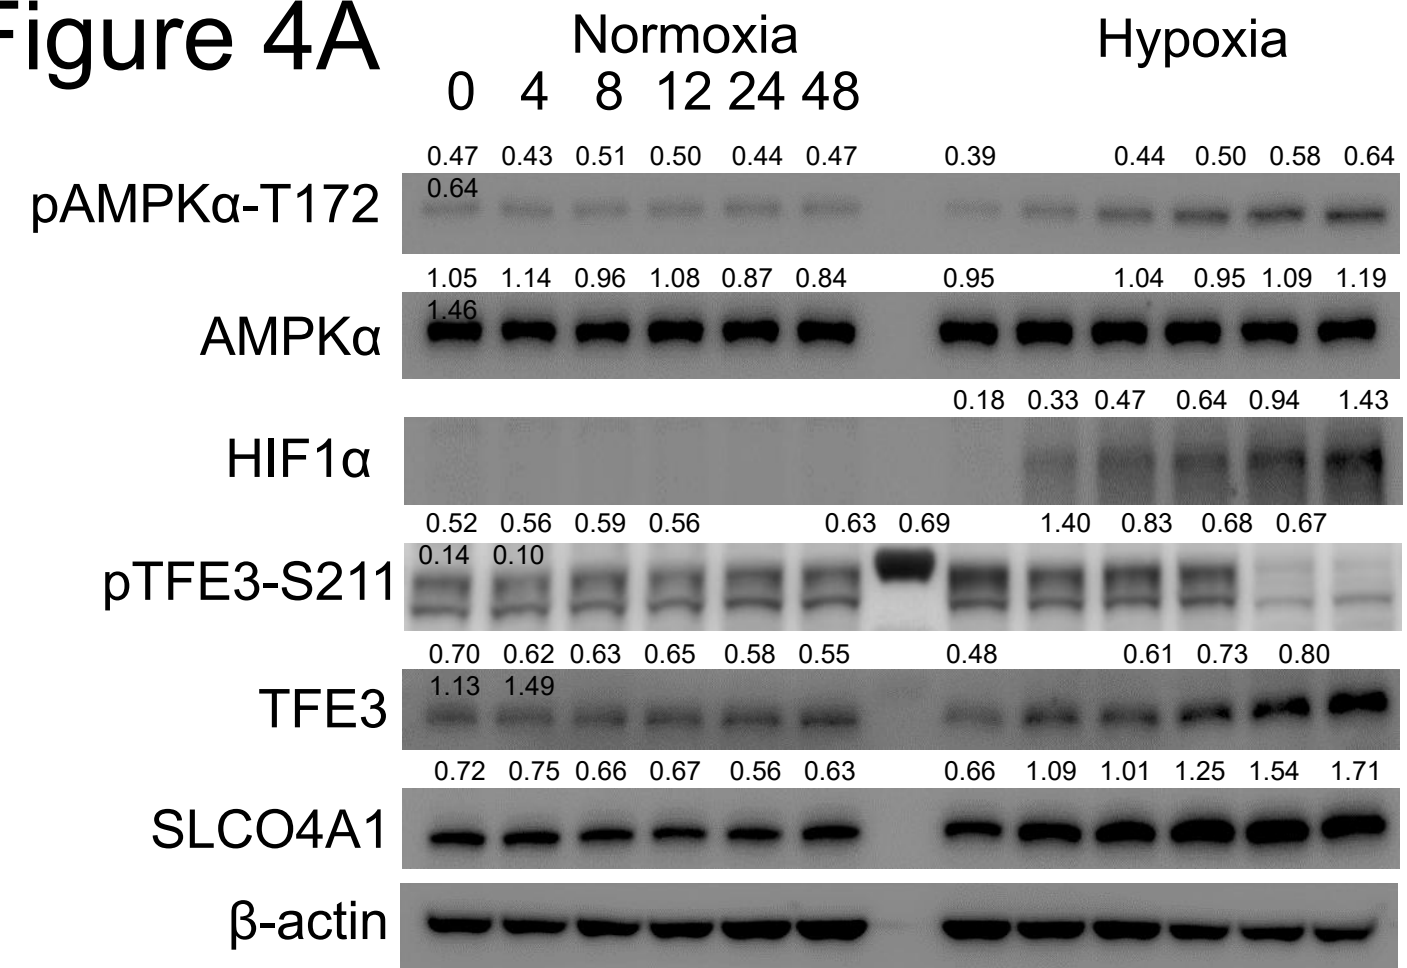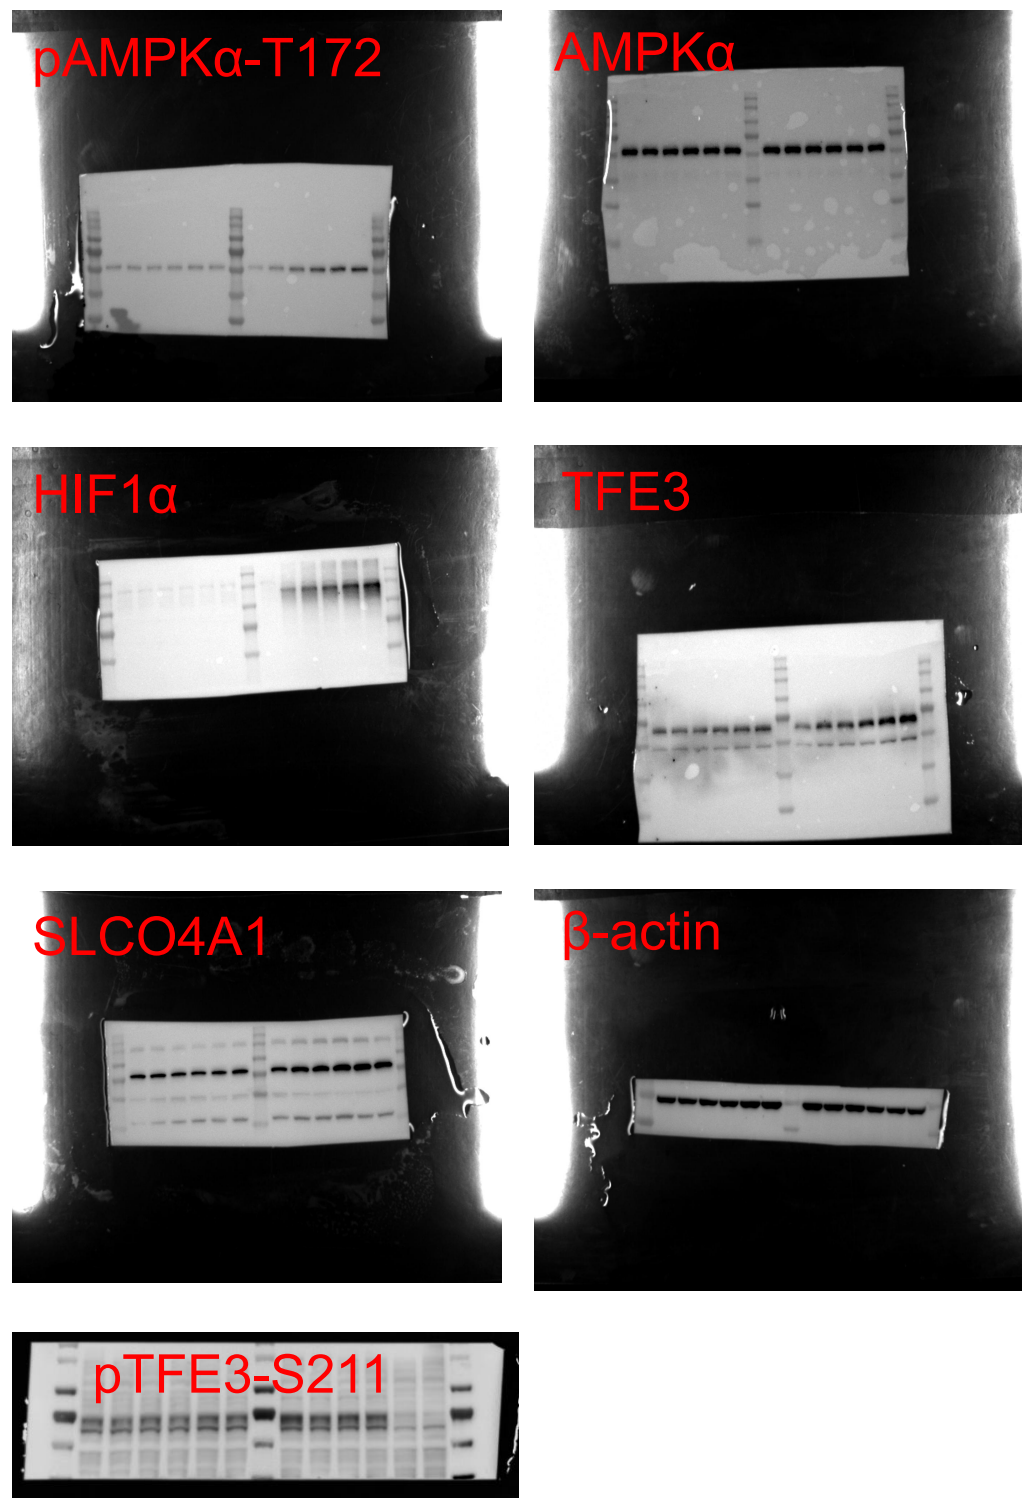

Figure 4B

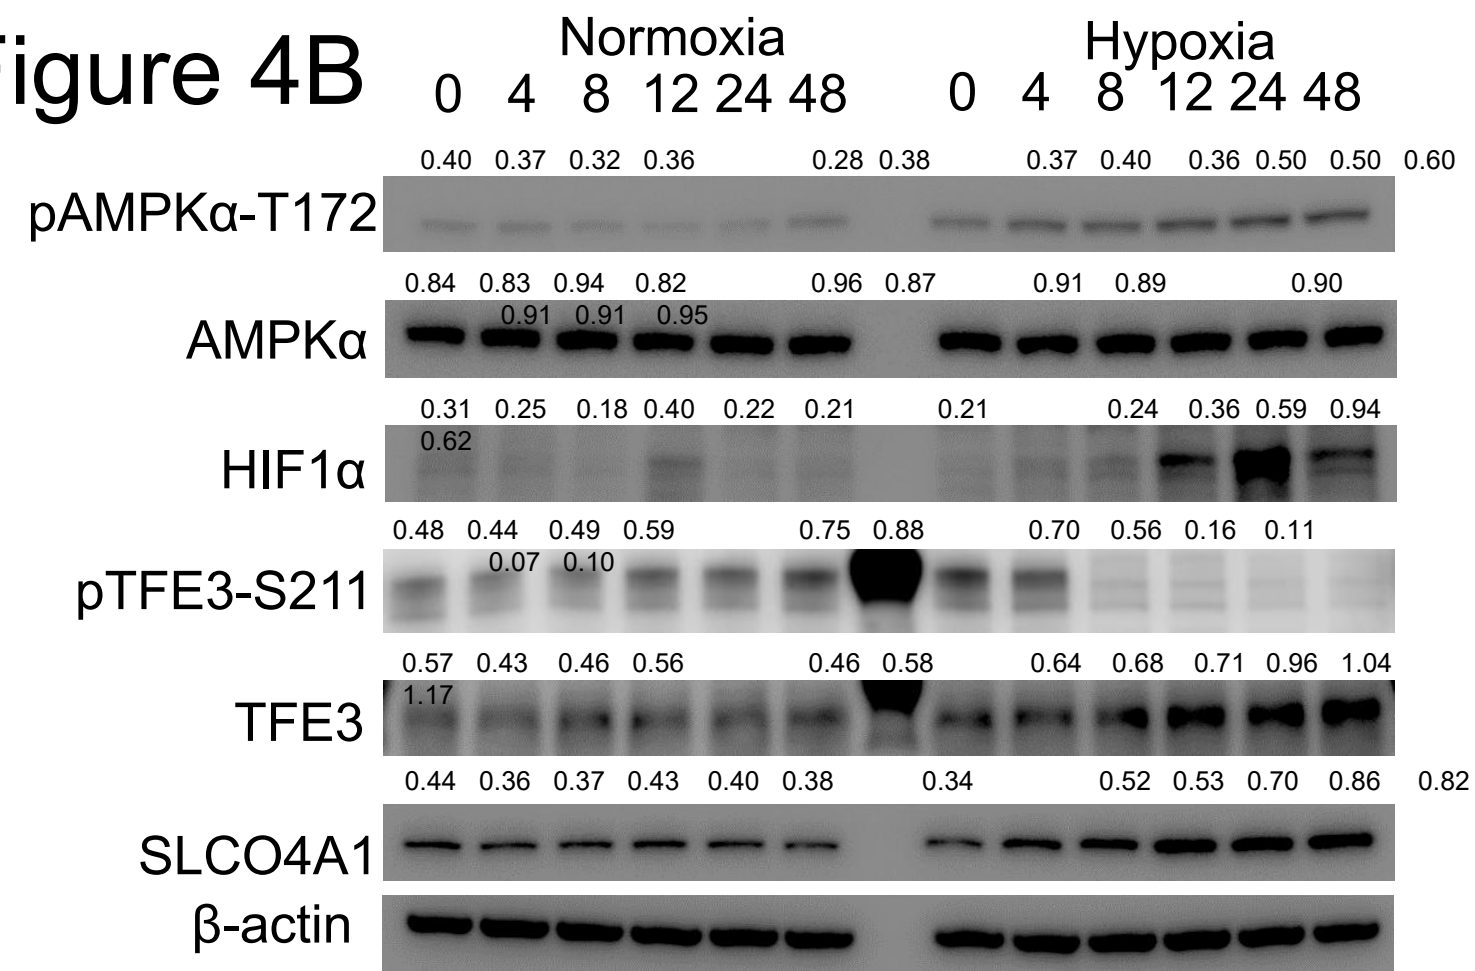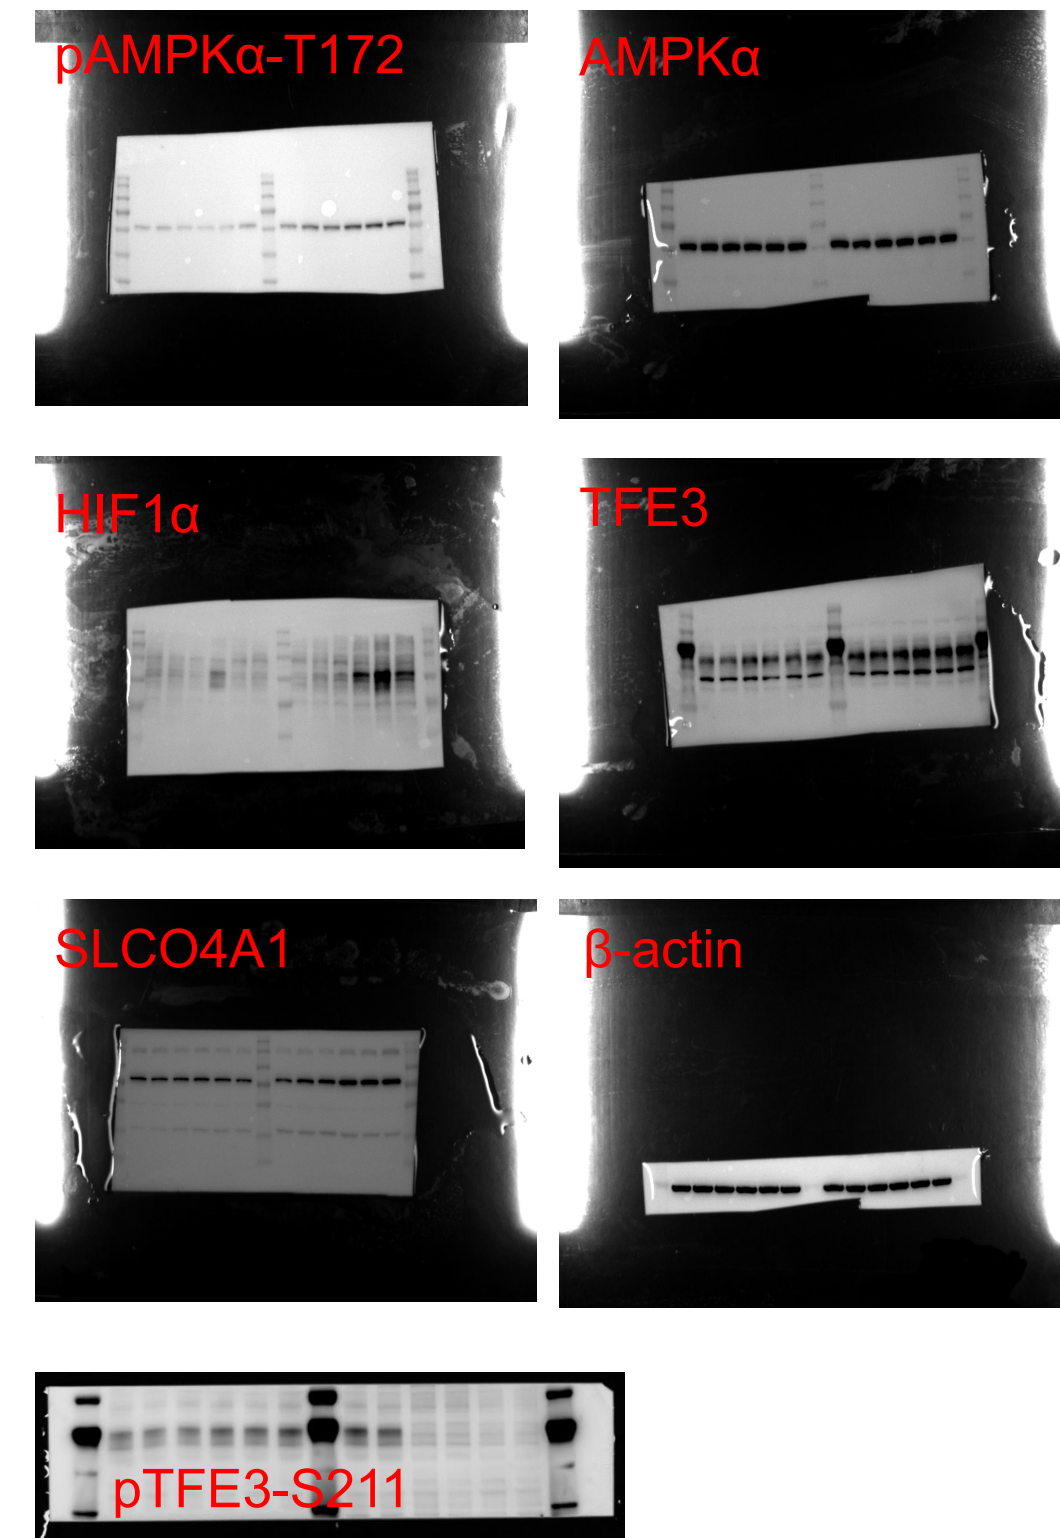

Figure 4C

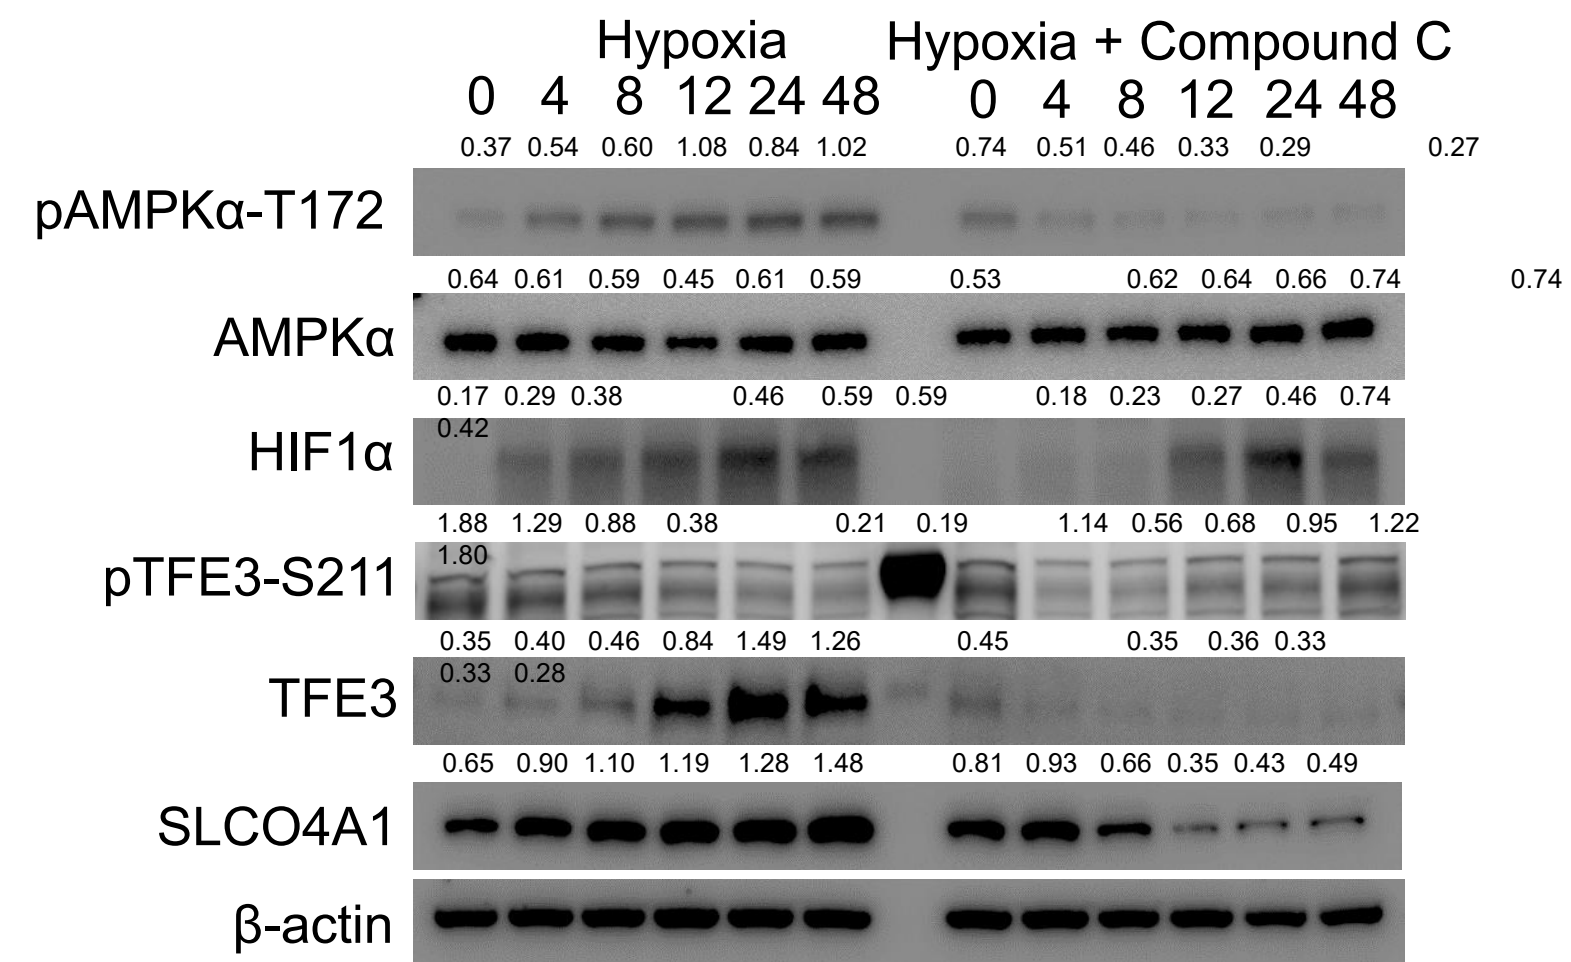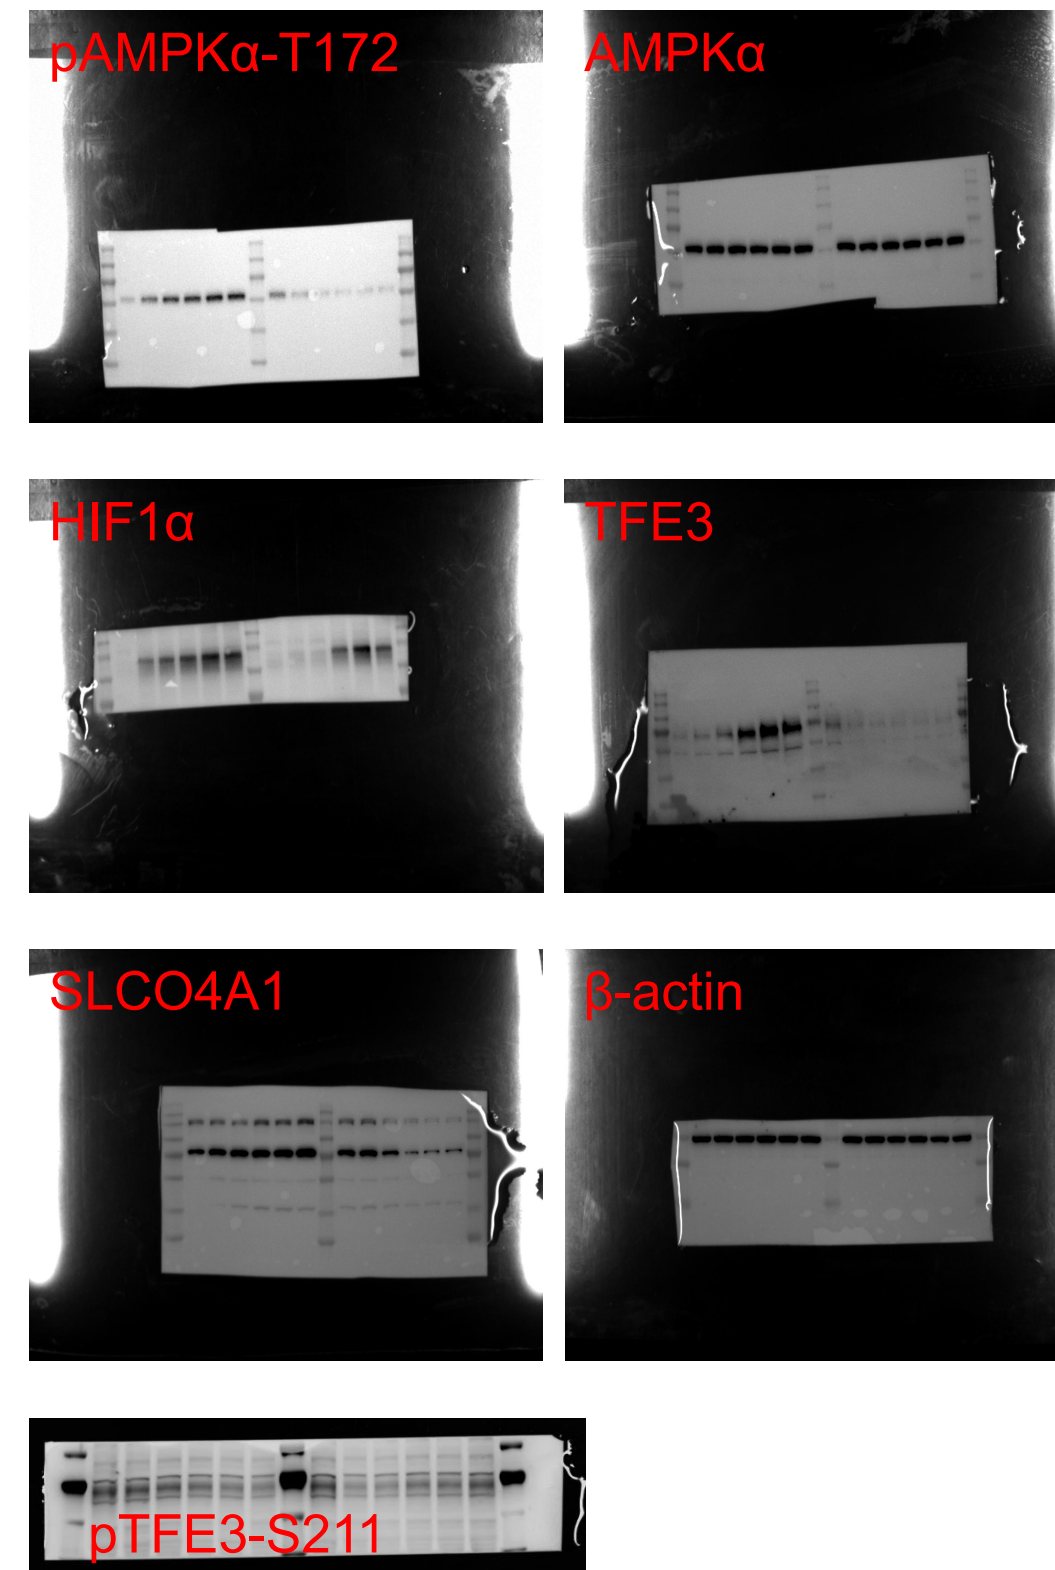

Figure 4D

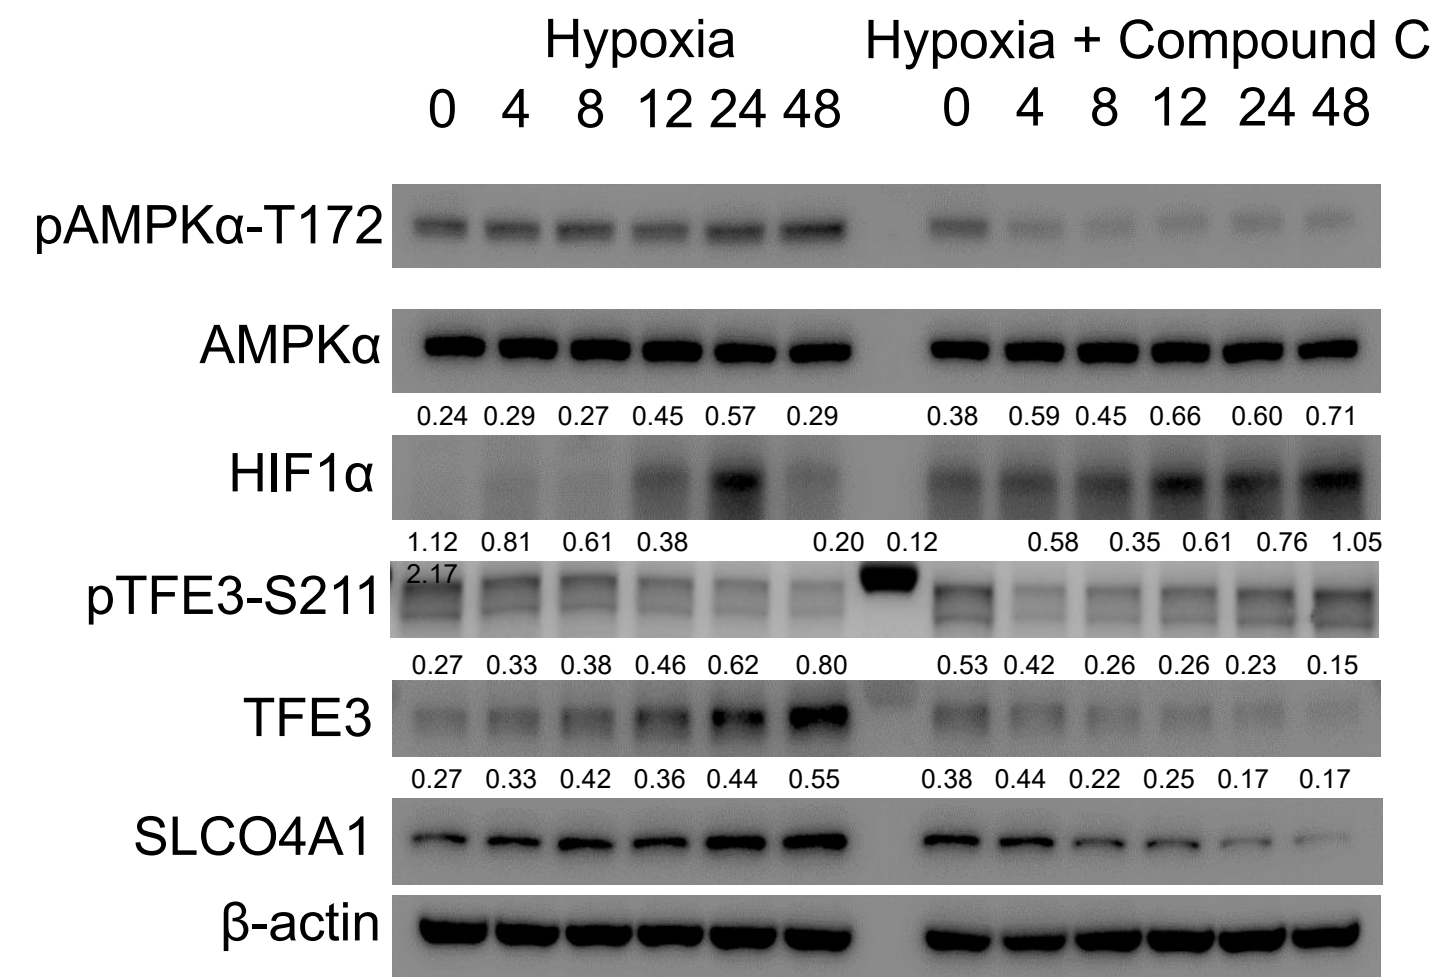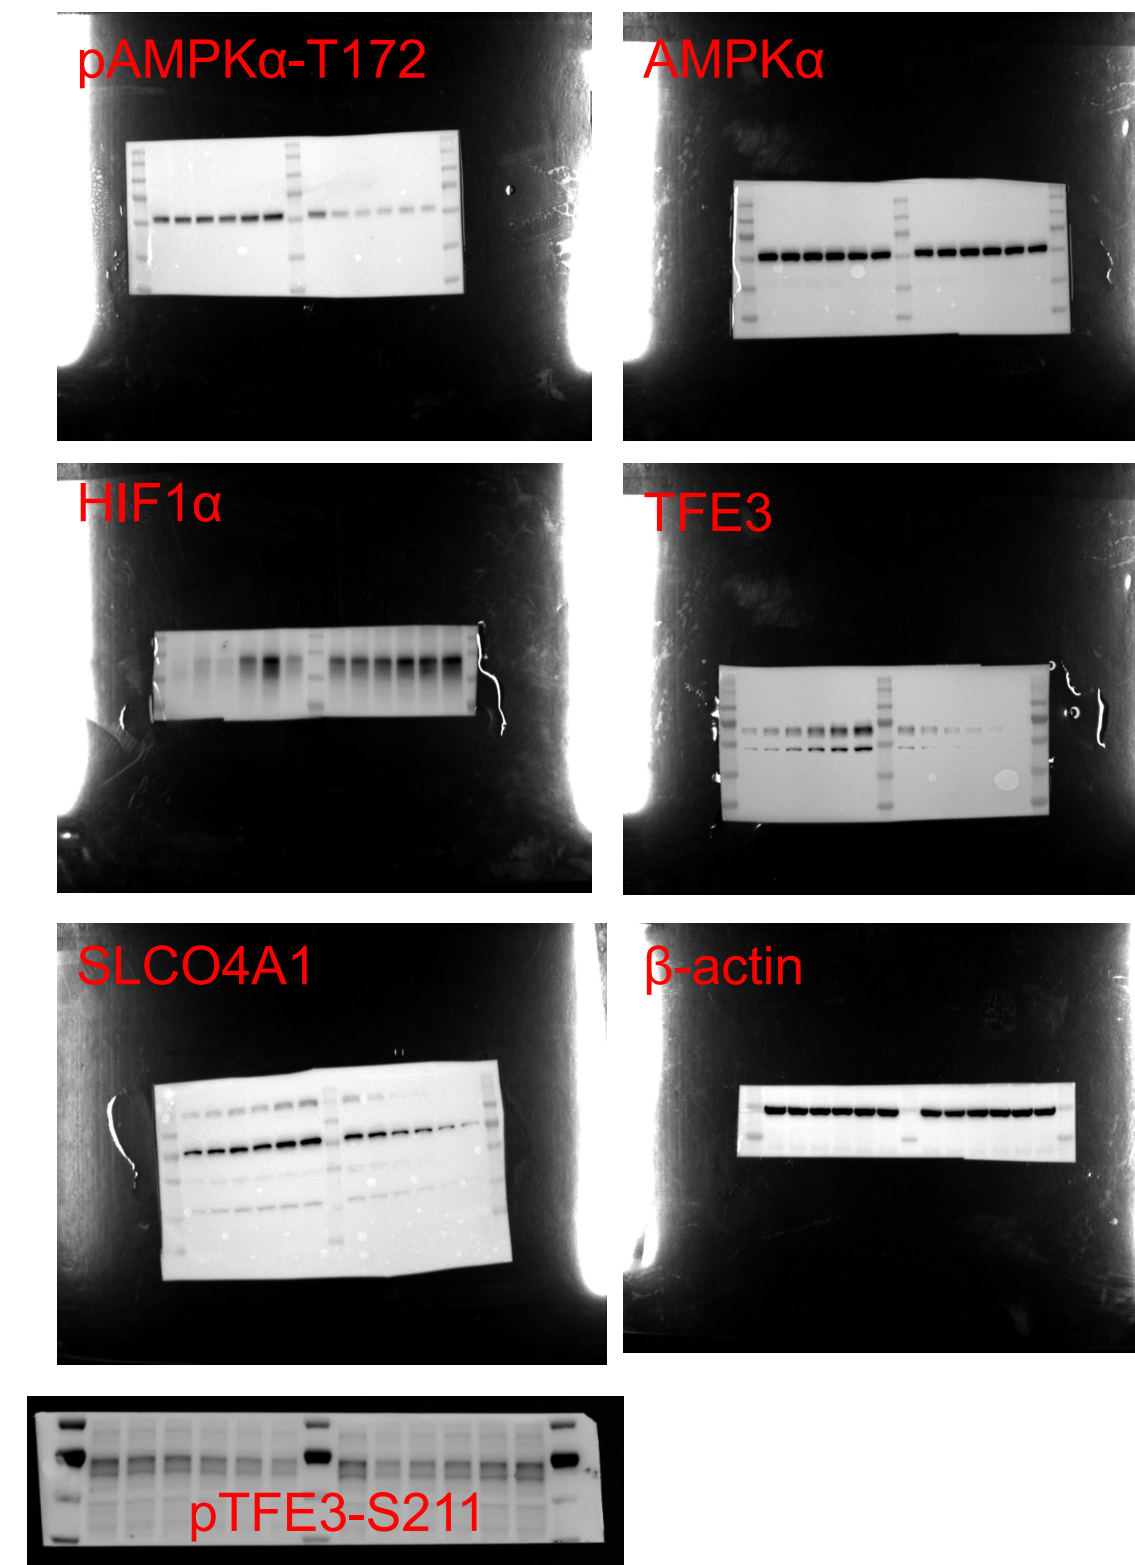

Figure 4G

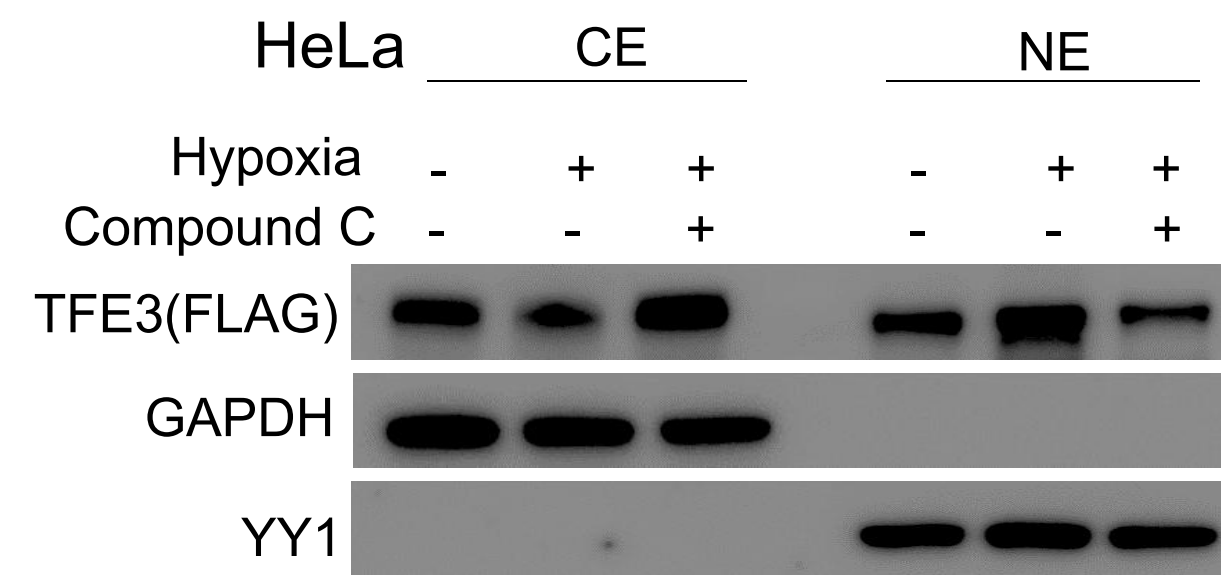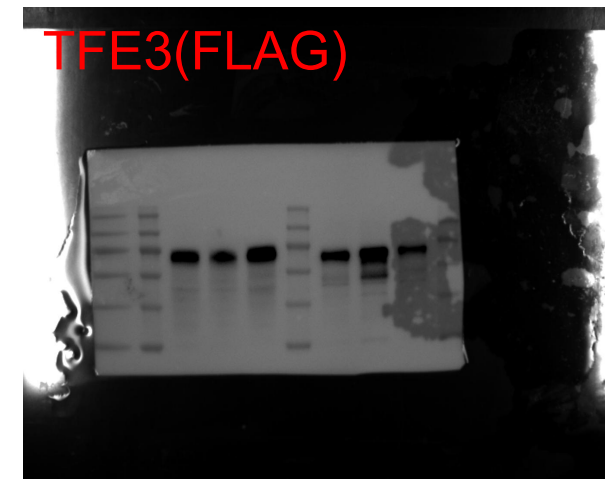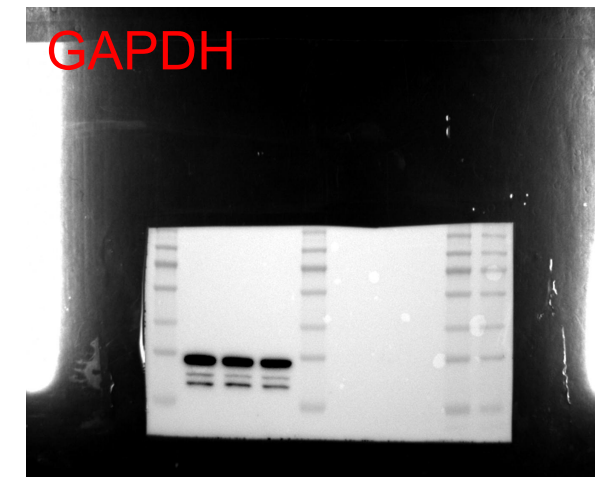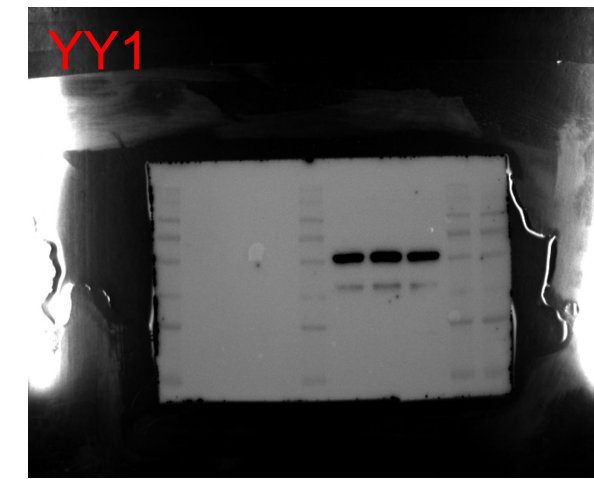

Figure 4H

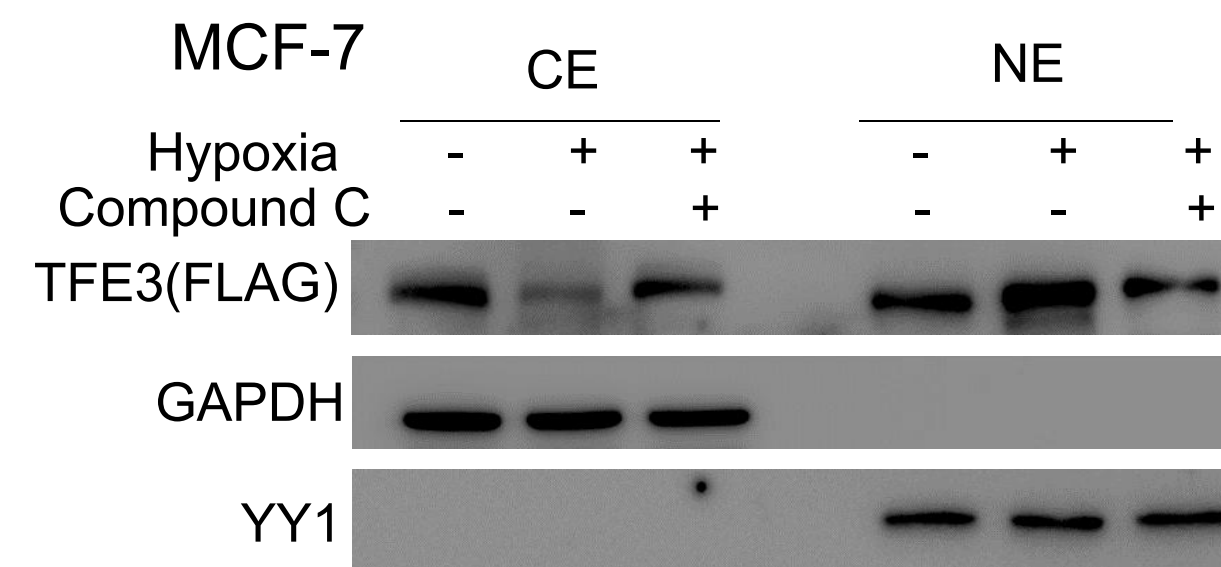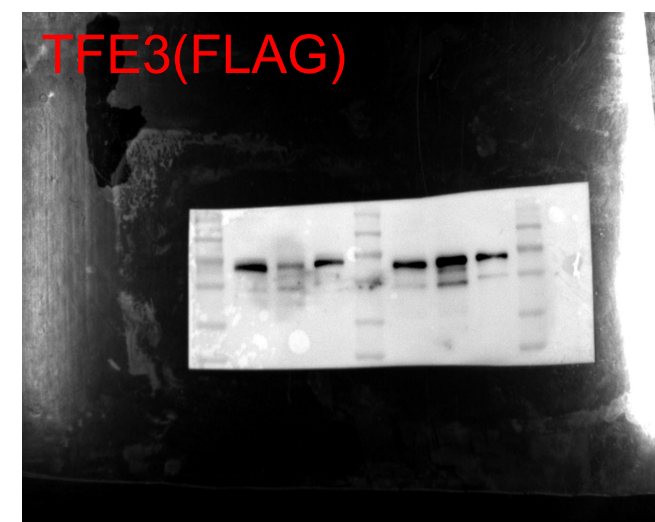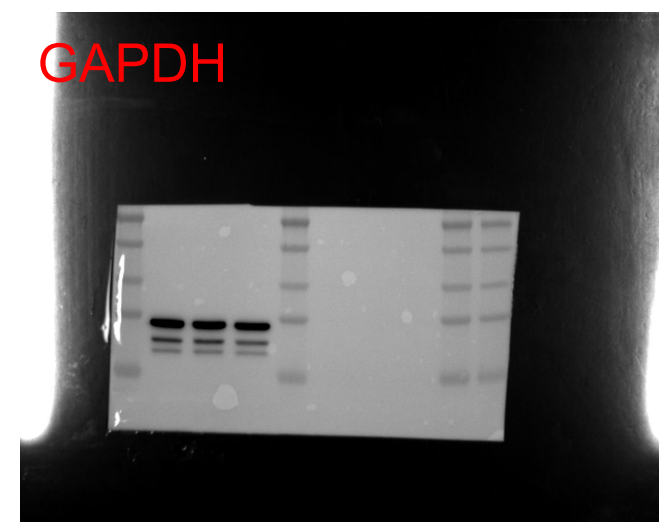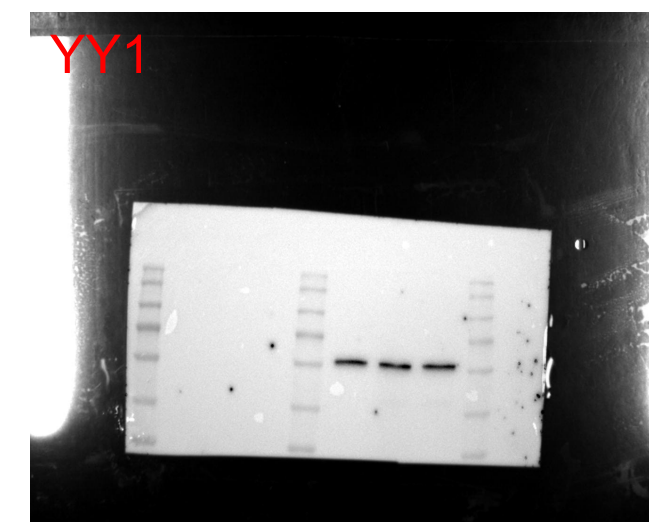

Figure 5C

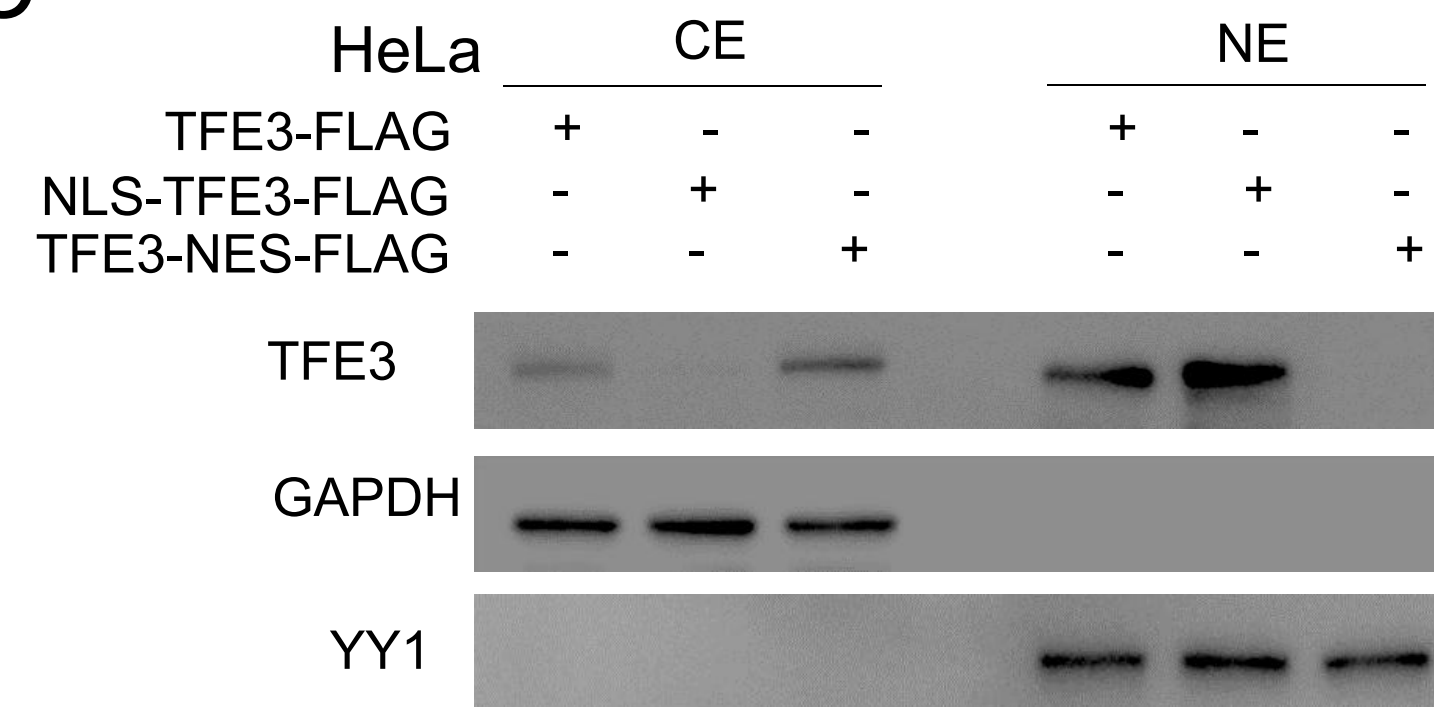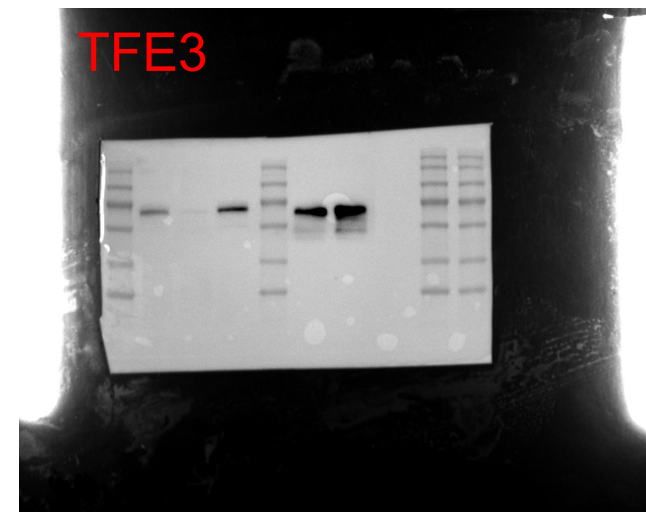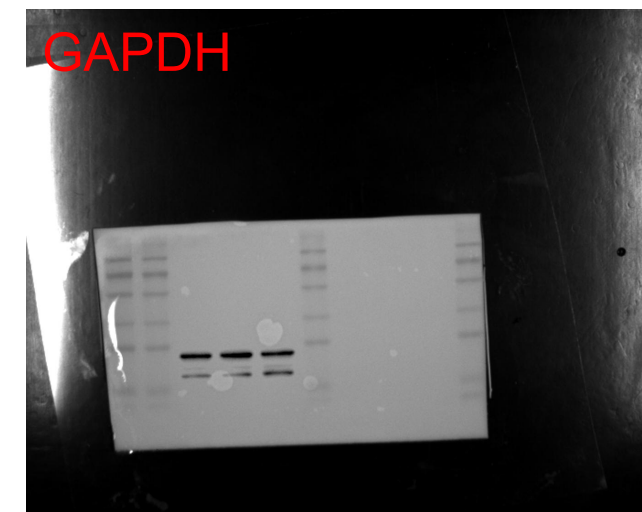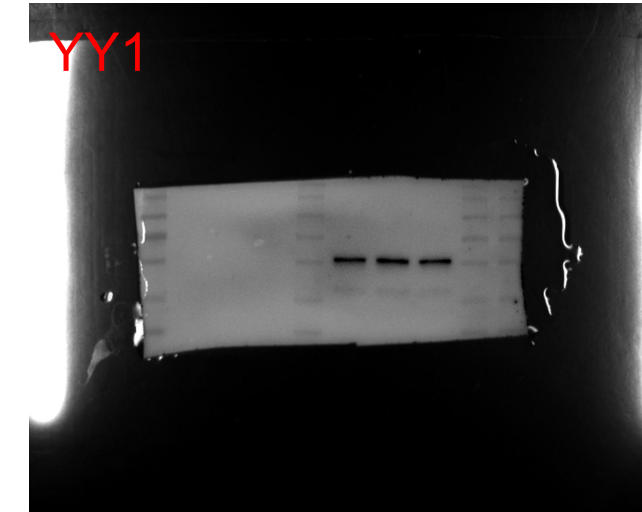

Figure 5D

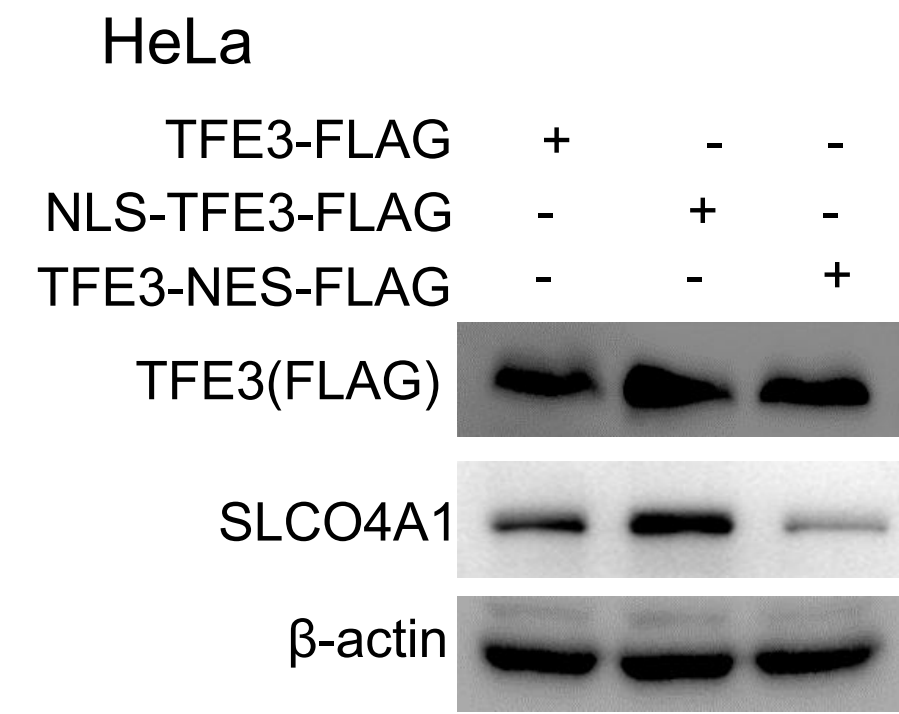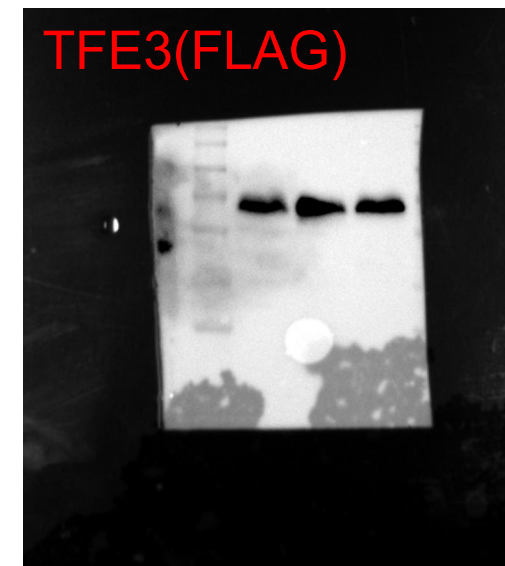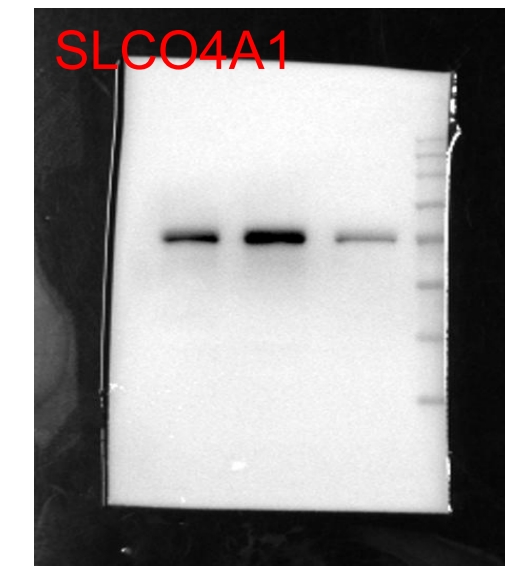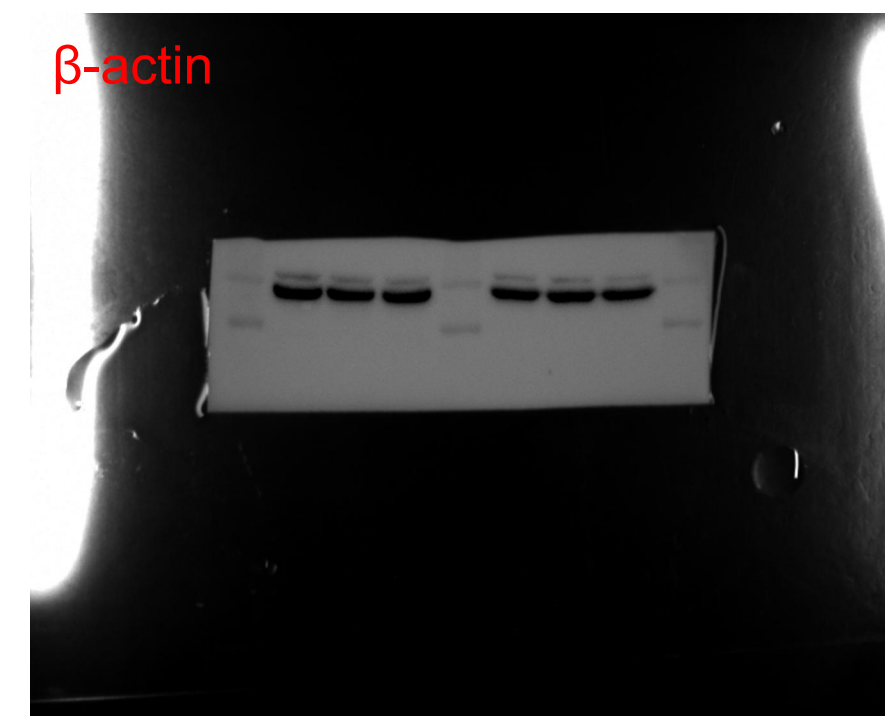

Figure 5E

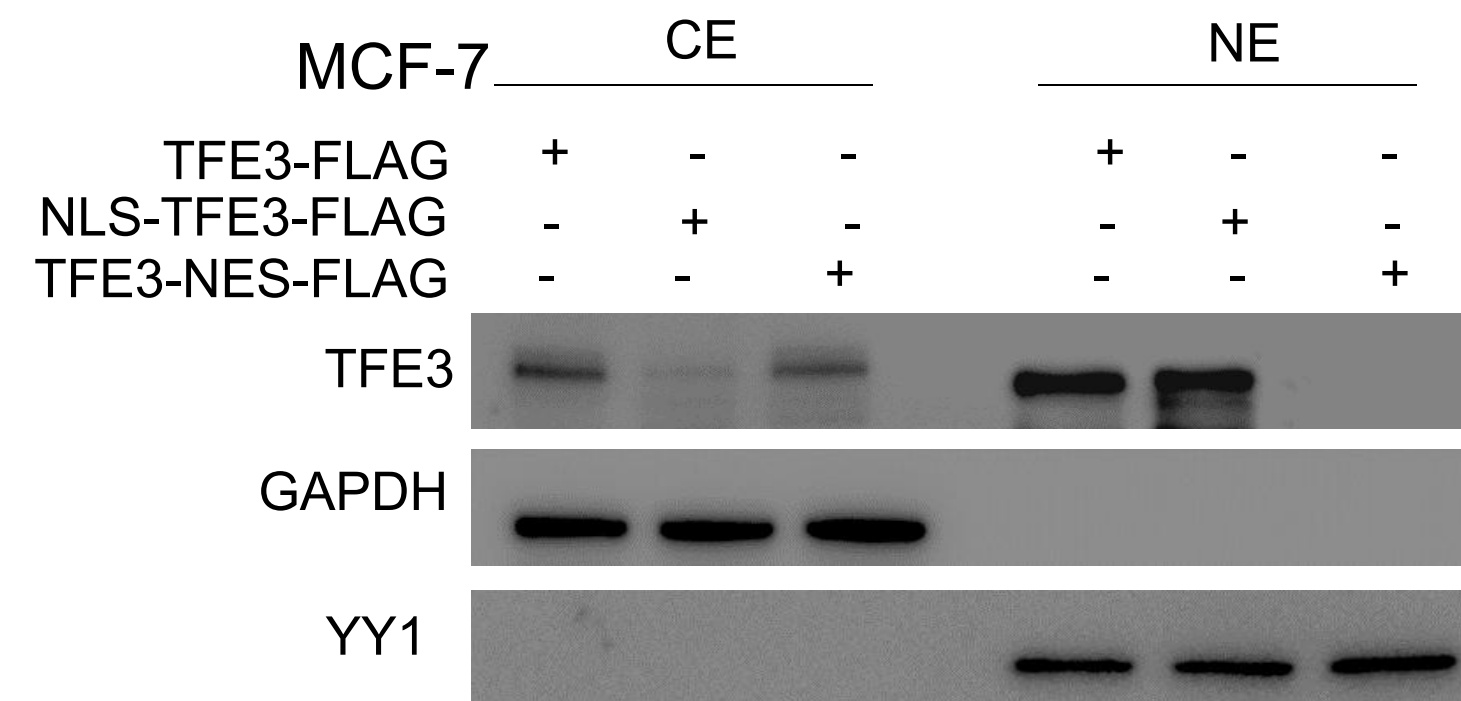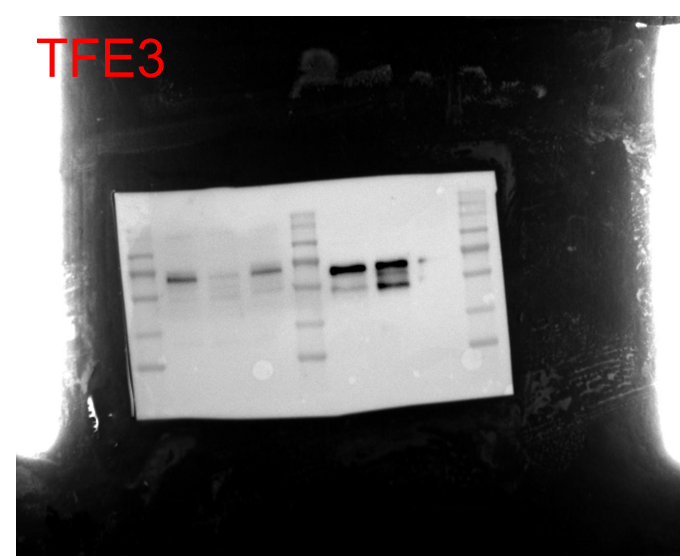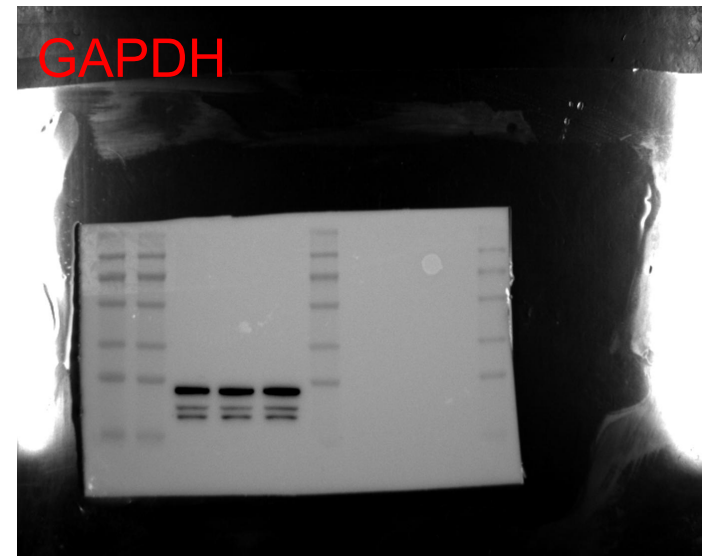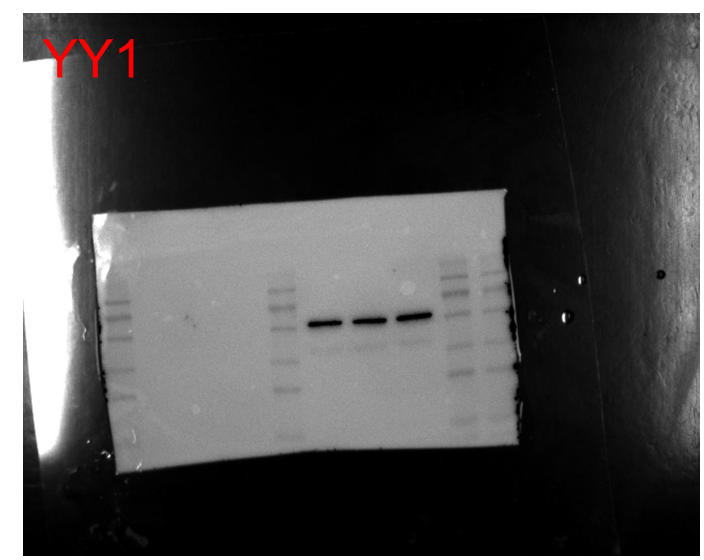

Figure 5F

MCF-7

|               |   |   |   |
|---------------|---|---|---|
| TFE3-FLAG     | + | - | - |
| NLS-TFE3-FLAG | - | + | - |
| TFE3-NES-FLAG | - | - | + |

  

|                |                                                                                     |                                                                                     |                                                                                     |
|----------------|-------------------------------------------------------------------------------------|-------------------------------------------------------------------------------------|-------------------------------------------------------------------------------------|
| TFE3(FLAG)     |  |  |  |
| SLCO4A1        |  |  |  |
| $\beta$ -actin |  |  |  |

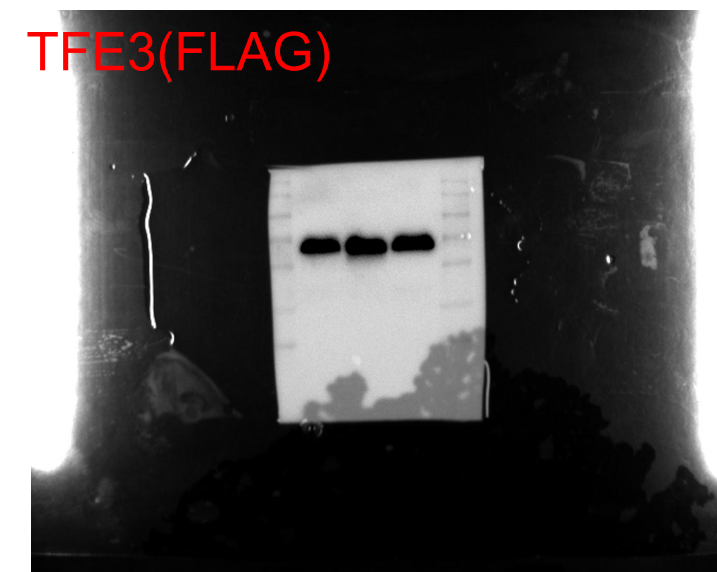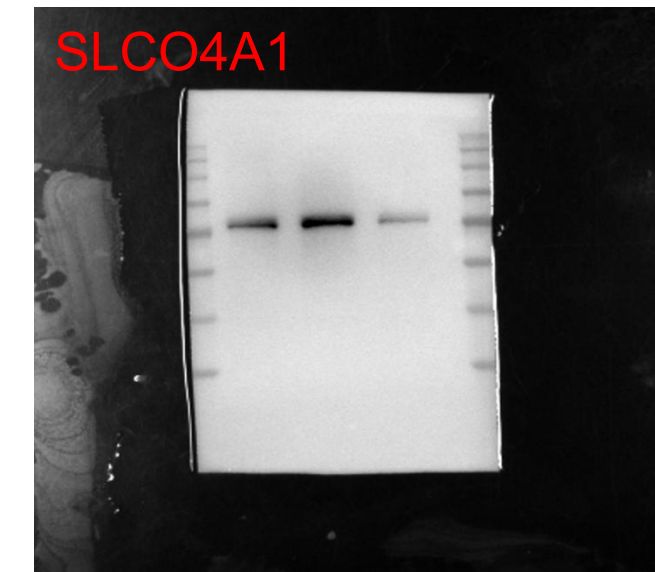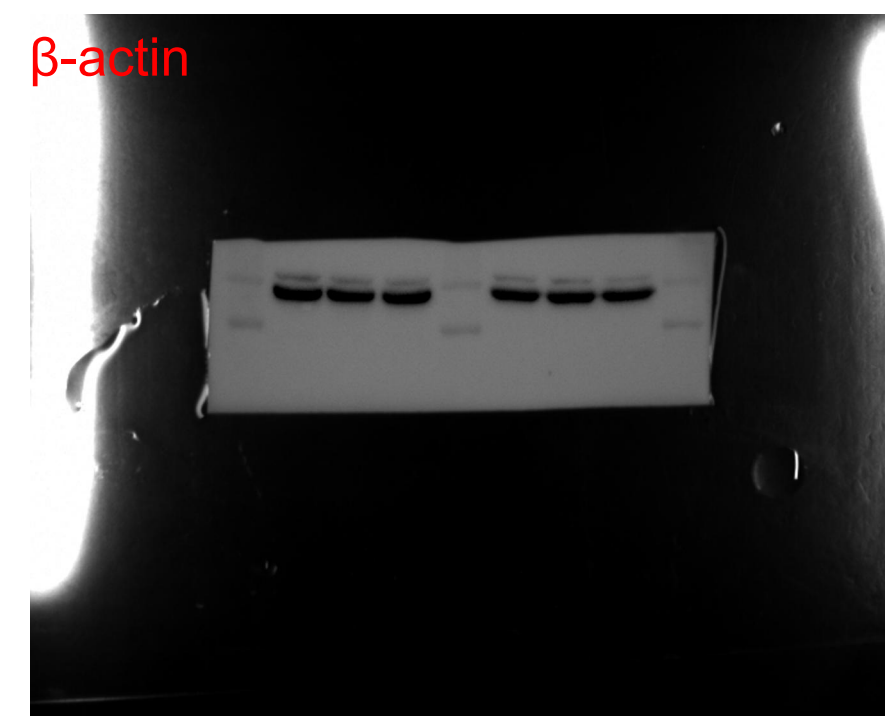

Figure 6A

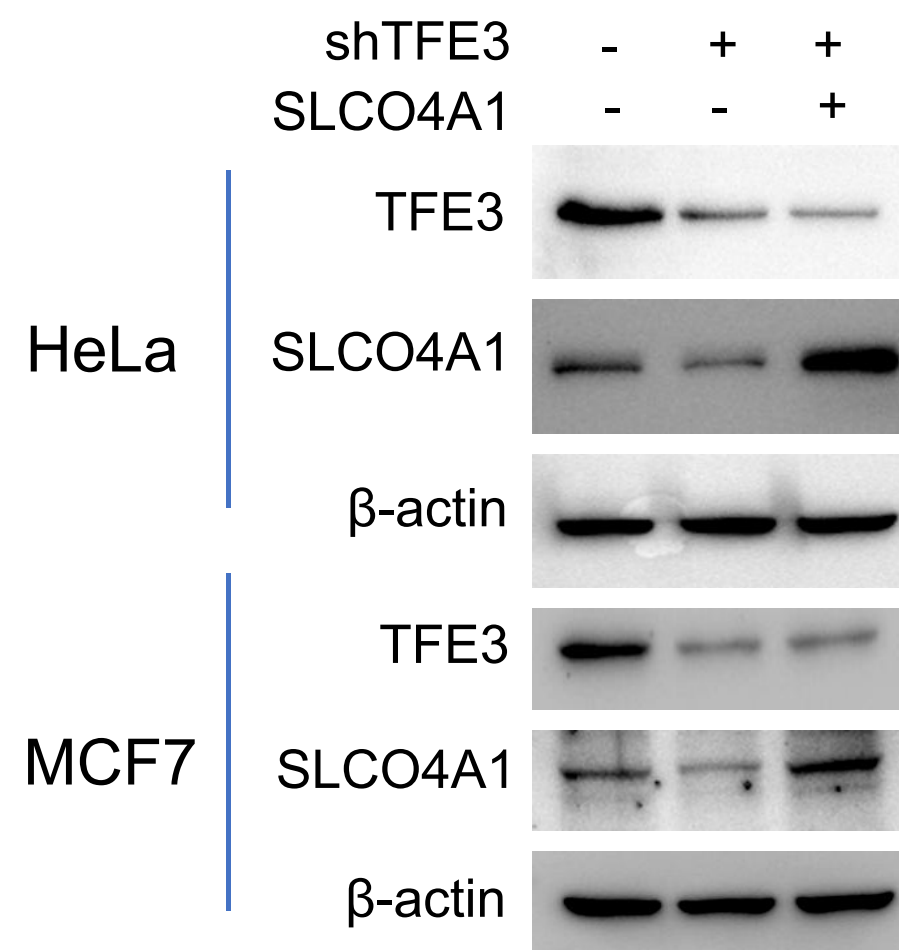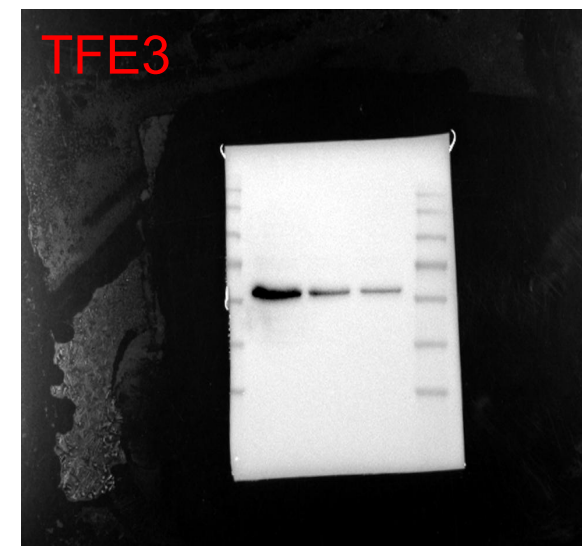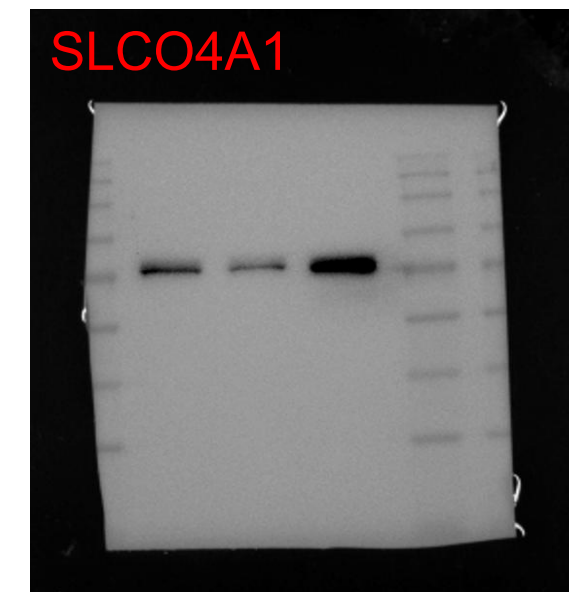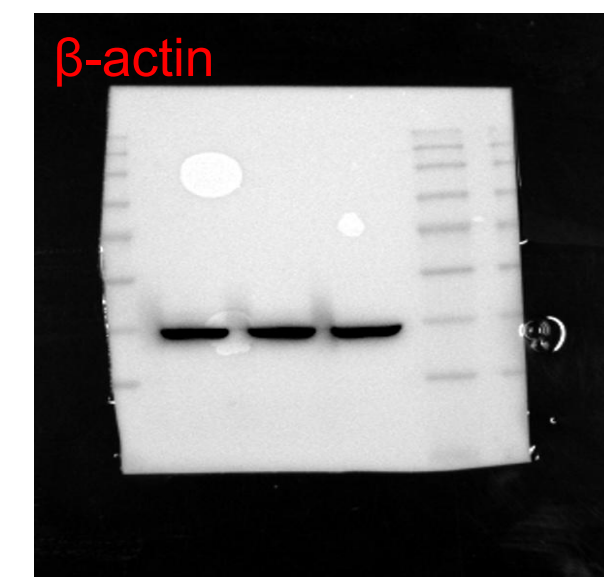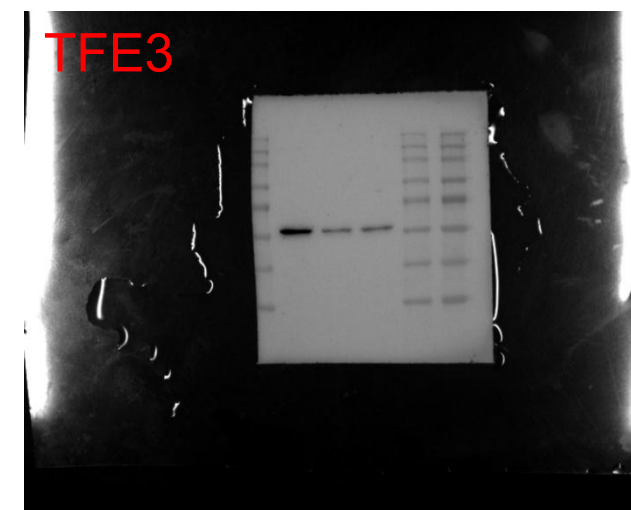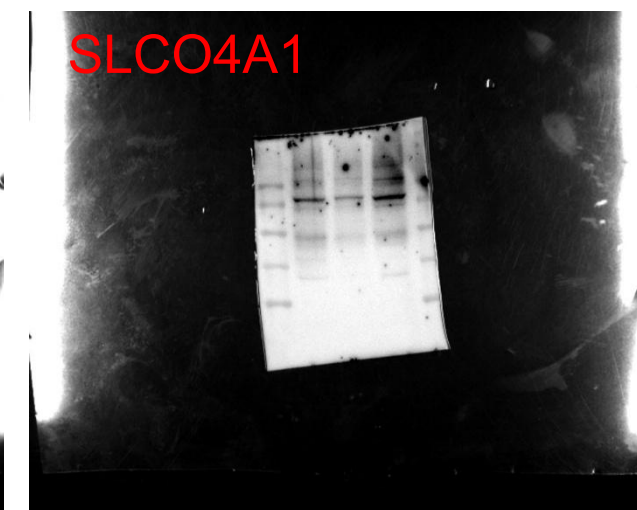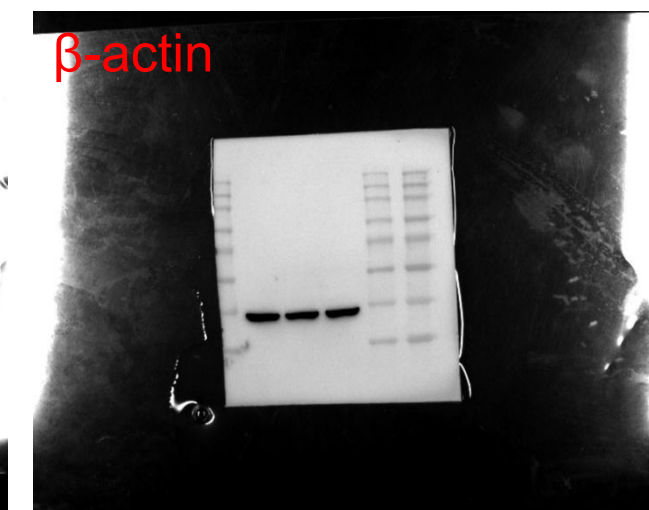

Supplement: Supplementary file 2 [file f620b74052f60b0824655dc5.pdf]
